# Supplementary material for: Leptospira borgpetersenii Leucine-Rich Repeat Proteins Provide Strong Protective Efficacy as Novel Leptospiral Vaccine Candidates
Source: MDPI journal article supplement (doi:10.3390/tropicalmed8010006), 2022-12-22
Supplement: s1 [file s1]

**Supplementary data S2.** BLAST search of the *KU\_R21\_2271* gene (NCBI accession: JX522460) yielded no significant similarity for the alignment with the genome of *L. interrogans* serovar Pomona (taxid:44276). Blast search of the *KU\_R21\_2271* sequence similarities were 75.58% to 78.19% identity with 75 genes from other *L. interrogans* strains.

Your search is limited to records that include: Leptospira interrogans (taxid:173), Leptospira interrogans serovar Pomona (taxid:44276), Leptospira interrogans serovar Pomona str. UT364 (taxid:1049925), Leptospira interrogans serovar Pomona str. Kennewicki LC82-25 (taxid:1049924), Leptospira interrogans serovar Pomona str. CSL4002 (taxid:1240691), Leptospira interrogans serovar Pomona str. Pomona (taxid:1001587), Leptospira interrogans serovar Pomona str. Fox 32256 (taxid:1218574), Leptospira interrogans serovar Pomona str. CSL10083 (taxid:1240692), Leptospira kirschneri serovar Pomona (taxid:561005), Leptospira borgpetersenii serovar Pomona (taxid:1192865), Leptospira borgpetersenii serovar Pomona str. 200901868 (taxid:1192866)

RID: DRCNYJJB01R  
 Job Title:JN627495:Leptospira borgpetersenii serovar...  
 Program: BLASTN  
 Query: Leptospira borgpetersenii serovar Sejroe leucine-rich repeat protein (LRR) gene, partial cds ID: JX522460.1(nucleic acid) Length: 612  
 Database: nt Nucleotide collection (nt)

Sequences producing significant alignments:

|                                                                   |       |        |       |         | Scientific | Common     | Max             |       |        |     |     |
|-------------------------------------------------------------------|-------|--------|-------|---------|------------|------------|-----------------|-------|--------|-----|-----|
| Total Query                                                       | E     | Per.   | Acc.  |         | Name       | Name       | Taxid           | Score |        |     |     |
| Description                                                       | Score | cover  | Value | Ident   | Len        | Accession  |                 |       |        |     |     |
| Leptospira interrogans strain UI29382 chromosome 1, complete...   | 95%   | 7e-135 | 78.19 | 4311919 |            | CP072853.1 | Leptospira i... | NA    | 173    | 482 | 482 |
| Leptospira interrogans serovar Canicola strain 611 chromosome ... | 95%   | 3e-133 | 78.02 | 4255595 |            | CP044513.1 | Leptospira i... | NA    | 211880 | 478 | 478 |
| Leptospira interrogans serovar Canicola strain LJ178 chromosom... | 95%   | 3e-133 | 78.02 | 4259066 |            | CP044509.1 | Leptospira i... | NA    | 211880 | 478 | 478 |
| Leptospira interrogans serovar Canicola strain 114 chromosome ... | 95%   | 3e-133 | 78.02 | 4218946 |            | CP022883.1 | Leptospira i... | NA    | 211880 | 478 | 478 |
| Leptospira interrogans strain FMAS_PN3 chromosome 1, complete...  | 95%   | 3e-133 | 78.02 | 4263490 |            | CP092663.1 | Leptospira i... | NA    | 173    | 478 | 478 |
| Leptospira interrogans strain FMAS_AP1 chromosome 1, complete...  | 95%   | 3e-133 | 78.02 | 4281936 |            | CP092681.1 | Leptospira i... | NA    | 173    | 478 | 478 |
| Leptospira interrogans strain FMAS_AP7 chromosome 1, complete...  | 95%   | 3e-133 | 78.02 | 4298104 |            | CP092152.1 | Leptospira i... | NA    | 173    | 478 | 478 |
| Leptospira interrogans serovar Bataviae strain D64 chromosome ... | 95%   | 3e-133 | 78.02 | 4355742 |            | CP077942.1 | Leptospira i... | NA    | 312175 | 478 | 478 |
| Leptospira interrogans serovar Bataviae strain 1548 chromosome... | 95%   | 3e-133 | 78.02 | 4354848 |            | CP043880.1 | Leptospira i... | NA    | 312175 | 478 | 478 |

|                                                                   |                 |    |        |     |     |
|-------------------------------------------------------------------|-----------------|----|--------|-----|-----|
| Leptospira interrogans serovar Canicola strain RUFN chromosome I  | Leptospira i... | NA | 211880 | 474 | 474 |
| 95% 4e-132 78.02 4208129 CP022885.1                               |                 |    |        |     |     |
| Leptospira interrogans strain FMAS_KW2 chromosome I, complete...  | Leptospira i... | NA | 173    | 473 | 473 |
| 95% 4e-132 77.85 4293951 CP039256.1                               |                 |    |        |     |     |
| Leptospira interrogans serovar Manilae strain UP-MMC-NIID HP...   | Leptospira i... | NA | 214675 | 473 | 473 |
| 95% 4e-132 77.85 4238922 CP011934.1                               |                 |    |        |     |     |
| Leptospira interrogans serovar Manilae strain UP-MMC-NIID LP...   | Leptospira i... | NA | 214675 | 473 | 473 |
| 95% 4e-132 77.85 4238972 CP011931.1                               |                 |    |        |     |     |
| Leptospira interrogans strain FMAS_RT2 chromosome 1, complete...  | Leptospira i... | NA | 173    | 473 | 473 |
| 95% 4e-132 77.85 4342805 CP092166.1                               |                 |    |        |     |     |
| Leptospira interrogans strain FMAS_PN2 chromosome 1, complete...  | Leptospira i... | NA | 173    | 473 | 473 |
| 95% 4e-132 77.85 4302184 CP092151.1                               |                 |    |        |     |     |
| Leptospira interrogans serovar Canicola strain 782 chromosome ... | Leptospira i... | NA | 211880 | 473 | 473 |
| 95% 4e-132 77.85 4556406 CP043884.1                               |                 |    |        |     |     |
| Leptospira interrogans serovar Copenhageni strain SK1 chromoso... | Leptospira i... | NA | 44275  | 469 | 469 |
| 95% 2e-130 77.68 4279936 CP048830.1                               |                 |    |        |     |     |
| Leptospira interrogans strain R12 chromosome 1                    | Leptospira i... | NA | 173    | 469 | 469 |
| 95% 2e-130 77.68 4223477 CP047508.1                               |                 |    |        |     |     |
| Leptospira interrogans strain R19 chromosome 1                    | Leptospira i... | NA | 173    | 469 | 469 |
| 95% 2e-130 77.68 4213431 CP047514.1                               |                 |    |        |     |     |
| Leptospira interrogans strain R7 chromosome 1                     | Leptospira i... | NA | 173    | 469 | 469 |
| 95% 2e-130 77.68 4212939 CP047512.1                               |                 |    |        |     |     |
| Leptospira interrogans strain R11 chromosome 1                    | Leptospira i... | NA | 173    | 469 | 469 |
| 95% 2e-130 77.68 4214328 CP047510.1                               |                 |    |        |     |     |
| Leptospira interrogans strain R13-L chromosome 1                  | Leptospira i... | NA | 173    | 469 | 469 |
| 95% 2e-130 77.68 4233607 CP047518.1                               |                 |    |        |     |     |
| Leptospira interrogans strain R17 chromosome 1                    | Leptospira i... | NA | 173    | 469 | 469 |
| 95% 2e-130 77.68 4213733 CP047500.1                               |                 |    |        |     |     |
| Leptospira interrogans strain R13 chromosome 1                    | Leptospira i... | NA | 173    | 469 | 469 |
| 95% 2e-130 77.68 4214175 CP047506.1                               |                 |    |        |     |     |
| Leptospira interrogans strain R22 chromosome 1                    | Leptospira i... | NA | 173    | 469 | 469 |
| 95% 2e-130 77.68 4206042 CP047496.1                               |                 |    |        |     |     |
| Leptospira interrogans strain R21 chromosome 1                    | Leptospira i... | NA | 173    | 469 | 469 |
| 95% 2e-130 77.68 4214555 CP047498.1                               |                 |    |        |     |     |
| Leptospira interrogans strain R16 chromosome 1                    | Leptospira i... | NA | 173    | 469 | 469 |
| 95% 2e-130 77.68 4213648 CP047502.1                               |                 |    |        |     |     |
| Leptospira interrogans serovar Hardjo strain L53 chromosome 1,... | Leptospira i... | NA | 176    | 469 | 469 |
| 95% 2e-130 77.68 4355568 CP043041.1                               |                 |    |        |     |     |
| Leptospira interrogans strain FMAS_KW1 chromosome I, complete...  | Leptospira i... | NA | 173    | 469 | 469 |
| 95% 2e-130 77.68 4306144 CP039258.1                               |                 |    |        |     |     |
| Leptospira interrogans strain FMAS_AW1 chromosome I, complete...  | Leptospira i... | NA | 173    | 469 | 469 |
| 95% 2e-130 77.68 4497709 CP039283.1                               |                 |    |        |     |     |
| Leptospira interrogans serovar Copenhageni strain FDAARGOS_203... | Leptospira i... | NA | 44275  | 469 | 469 |
| 95% 2e-130 77.68 4280582 CP020414.2                               |                 |    |        |     |     |
| Leptospira interrogans strain RCA chromosome I                    | Leptospira i... | NA | 173    | 469 | 469 |
| 95% 2e-130 77.68 4241665 CP022538.1                               |                 |    |        |     |     |

|                                                                   |                 |    |         |     |     |
|-------------------------------------------------------------------|-----------------|----|---------|-----|-----|
| Leptospira interrogans serovar Hardjo-prajitno strain...          | Leptospira i... | NA | 38347   | 469 | 469 |
| 95% 2e-130 77.68 4339653 CP013147.1                               |                 |    |         |     |     |
| Leptospira interrogans serovar Hardjo str. Norma chromosome I,... | Leptospira i... | NA | 1279460 | 469 | 469 |
| 95% 2e-130 77.68 4406718 CP012603.1                               |                 |    |         |     |     |
| Leptospira interrogans serovar Bratislava strain PigK151...       | Leptospira i... | NA | 338215  | 469 | 469 |
| 95% 2e-130 77.68 4370471 CP011410.1                               |                 |    |         |     |     |
| Leptospira interrogans serovar Linhai str. 56609 chromosome 1,... | Leptospira i... | NA | 1395589 | 469 | 469 |
| 95% 2e-130 77.68 4331770 CP006723.1                               |                 |    |         |     |     |
| Leptospira interrogans strain KR40 chromosome 1, complete...      | Leptospira i... | NA | 173     | 469 | 469 |
| 95% 2e-130 77.68 4315670 CP096129.2                               |                 |    |         |     |     |
| Leptospira interrogans strain N 116 chromosome 1, complete...     | Leptospira i... | NA | 173     | 469 | 469 |
| 95% 2e-130 77.68 4312952 CP097315.1                               |                 |    |         |     |     |
| Leptospira interrogans strain NEG7 chromosome I                   | Leptospira i... | NA | 173     | 469 | 469 |
| 95% 2e-130 77.68 4297584 CP093938.1                               |                 |    |         |     |     |
| Leptospira interrogans strain FMAS_KG2 chromosome 1, complete...  | Leptospira i... | NA | 173     | 469 | 469 |
| 95% 2e-130 77.68 4721761 CP092985.1                               |                 |    |         |     |     |
| Leptospira interrogans strain FMAS_PD1 chromosome 1, complete...  | Leptospira i... | NA | 173     | 469 | 469 |
| 95% 2e-130 77.68 4503505 CP092743.1                               |                 |    |         |     |     |
| Leptospira interrogans strain FMAS_AW2 chromosome 1, complete...  | Leptospira i... | NA | 173     | 469 | 469 |
| 95% 2e-130 77.68 4634565 CP092739.1                               |                 |    |         |     |     |
| Leptospira interrogans strain FMAS_AW3 chromosome 1, complete...  | Leptospira i... | NA | 173     | 469 | 469 |
| 95% 2e-130 77.68 4526110 CP092676.1                               |                 |    |         |     |     |
| Leptospira interrogans strain FMAS_KG1 chromosome 1, complete...  | Leptospira i... | NA | 173     | 469 | 469 |
| 95% 2e-130 77.68 4458643 CP092672.1                               |                 |    |         |     |     |
| Leptospira interrogans strain FMAS_AP6 chromosome 1, complete...  | Leptospira i... | NA | 173     | 469 | 469 |
| 95% 2e-130 77.68 4525852 CP092156.1                               |                 |    |         |     |     |
| Leptospira interrogans strain FMAS_AP5 chromosome 1, complete...  | Leptospira i... | NA | 173     | 469 | 469 |
| 95% 2e-130 77.68 4478874 CP092161.1                               |                 |    |         |     |     |
| Leptospira interrogans serovar Bataviae strain 1489 chromosome... | Leptospira i... | NA | 312175  | 469 | 469 |
| 95% 2e-130 77.68 4431091 CP043893.1                               |                 |    |         |     |     |
| Leptospira interrogans serovar Icterohaemorrhagiae strain 898...  | Leptospira i... | NA | 90062   | 469 | 469 |
| 95% 2e-130 77.68 4280412 CP043891.1                               |                 |    |         |     |     |
| Leptospira interrogans serovar Icterohaemorrhagiae strain...      | Leptospira i... | NA | 90062   | 469 | 469 |
| 95% 2e-130 77.68 4367462 CP043876.1                               |                 |    |         |     |     |
| Leptospira interrogans serovar Lai str. IPAV chromosome 1,...     | Leptospira i... | NA | 573825  | 469 | 469 |
| 95% 2e-130 77.68 4349158 CP001221.1                               |                 |    |         |     |     |
| Leptospira interrogans serovar Lai str. 56601 chromosome I,...    | Leptospira i... | NA | 189518  | 469 | 469 |
| 95% 2e-130 77.68 4338762 AE010300.2                               |                 |    |         |     |     |
| Leptospira interrogans serovar Copenhageni str. Fiocruz L1-130... | Leptospira i... | NA | 267671  | 469 | 469 |
| 95% 2e-130 77.68 4277185 AE016823.1                               |                 |    |         |     |     |
| Leptospira interrogans serovar Copenhageni/Icterohaemorrhagiae... | Leptospira i... | NA | 766041  | 465 | 465 |
| 95% 2e-129 77.68 4221879 CP018146.1                               |                 |    |         |     |     |
| Leptospira interrogans serovar Canicola leucine-rich repeat...    | Leptospira i... | NA | 211880  | 325 | 325 |
| 66% 1e-87 77.78 410 JX426070.1                                    |                 |    |         |     |     |
| Leptospira interrogans serovar Autumnalis leucine-rich repeat...  | Leptospira i... | NA | 174157  | 321 | 321 |
| 66% 5e-86 77.53 411 JX426069.1                                    |                 |    |         |     |     |

|                                                                  |                    |        |     |     |
|------------------------------------------------------------------|--------------------|--------|-----|-----|
| Leptospira interrogans serovar Hebdomadis leucine-rich repeat... | Leptospira i... NA | 211881 | 259 | 259 |
| 47% 1e-67 79.86 303 JX426072.1                                   |                    |        |     |     |
| Leptospira interrogans serovar Pyrogenes leucine-rich repeat...  | Leptospira i... NA | 280500 | 214 | 214 |
| 49% 5e-54 75.58 312 JX426071.1                                   |                    |        |     |     |

## Alignments:

>Leptospira interrogans strain UI29382 chromosome 1, complete sequence  
Sequence ID: CP072853.1 Length: 4311919  
Range 1: 1377193 to 1377779

Score:482 bits(534), Expect:7e-135,  
Identities:459/587(78%), Gaps:0/587(0%), Strand: Plus/Plus

|       |         |                                                                |         |
|-------|---------|----------------------------------------------------------------|---------|
| Query | 26      | TCGACTGTAAAAAGAATGCGGAAGAGATTTTGGGAGAGGCAAAGGCAAAACCGGAATTGG   | 85      |
|       |         |                                                                |         |
| Sbjct | 1377193 | TCGATTGTAAAAAAACGCGGTAGAGATTTTAGAAGAAGCAAAGAGAAAATCGGAATCGA    | 1377252 |
| Query | 86      | TTCAAACCTTTGGATTTTGGGAATGCAGAAGTTGTCCACGGTTCCGGAAGAAGTTTGCGGTT | 145     |
|       |         |                                                                |         |
| Sbjct | 1377253 | TTCAATCTTAGATTTAGGAATGCAAAGTTAACCTCGATTCCAGAAGGAGTTTGCTCTT     | 1377312 |
| Query | 146     | TTCCGAATTTAACCAAGTTGGATCTTCGTTTAAACAGTTTGACTTTTCTTCCGGAATTTA   | 205     |
|       |         |                                                                |         |
| Sbjct | 1377313 | TTCCGAATTTGACTCAGCTGGATTTACGTTTGAACAGTTTGAATTCTCTTCTGTTGGA     | 1377372 |
| Query | 206     | TCGGAGAATGTAAACGCCTTGAACAACCTTAATCTTTTCGGGAACGACCTTACAACATTTTC | 265     |
|       |         |                                                                |         |
| Sbjct | 1377373 | TTGGAGCTTGTA AAAATCTGGAACAAATTAACCTTTTCGGAAATGATCTAAATACGGTTC  | 1377432 |
| Query | 266     | CGTCTACGTTTTCTAAATTA AAAAATCTGAAAGTGTTACTGGCGGGAAATAACGATTTTA  | 325     |
|       |         |                                                                |         |
| Sbjct | 1377433 | CATCTTCTTTTTCTAAATTAAGAATTTGAAAGTATTGCTCTTGGGTAATAACGATTTTA    | 1377492 |
| Query | 326     | CGATTCTACCCTCCGAACCTTTTGTTCCTTCCGTTGATCAAAATTCTATACGTAGATCGGA  | 385     |
|       |         |                                                                |         |
| Sbjct | 1377493 | CTTTTCTACCTTCGGAACCTTTTGTTCCTGCCTTTGATTAAACCCTGTACTTGGATCAAA   | 1377552 |
| Query | 386     | ATAAATTAACCTCTAACGGAAACGGATGTGGAAATTCTCGCTTCTCTTTCTCCTTGGAGG   | 445     |
|       |         |                                                                |         |
| Sbjct | 1377553 | ACAAGCTTACGTTGACCGAAACGGATGTTGAAATTCTAGCTTCTCTTTCCAGTTTGGAAG   | 1377612 |
| Query | 446     | AATTGGATCTGAGTCTGAATTCGGGGATTAAGGCGCTCCCTTTTAATTACGAAAACTTG    | 505     |
|       |         |                                                                |         |
| Sbjct | 1377613 | AATTGGATCTTAATTTGAACCTCTGGAATTAAGTGCTTCCTTCTAACTATAATAAATTGA   | 1377672 |
| Query | 506     | TAAATCTCATTAATCTAAAAAGATTGAATATTaaaaaaaCTTCATTAAAGGGAGAGGATG   | 565     |
|       |         |                                                                |         |
| Sbjct | 1377673 | AAAATCTGACTCATTTAAAAAGATTGAATATTA AAAAATTCATTAAAGGGGAAGATG     | 1377732 |
| Query | 566     | CAGATAAATTGCAGGCGATTCTTCCAAATACCAAAATCGACTACTGA                | 612     |
|       |         |                                                                |         |
| Sbjct | 1377733 | CTGATAAATTACAAGCAGTTCTCCCAAATACAAAATAGACTATTGA                 | 1377779 |

>Leptospira interrogans serovar Canicola strain 611 chromosome 1, complete sequence  
Sequence ID: CP044513.1 Length: 4255595  
Range 1: 1351973 to 1352559

Score:478 bits(529), Expect:3e-133,  
Identities:458/587(78%), Gaps:0/587(0%), Strand: Plus/Plus

|       |         |                                                              |         |
|-------|---------|--------------------------------------------------------------|---------|
| Query | 26      | TCGACTGTAAAAAGAATGCGGAAGAGATTTTGGGAGAGGCAAAGGCAAAACCGGAATTGG | 85      |
|       |         |                                                              |         |
| Sbjct | 1351973 | TCGATTGTAAAAAAACGCGGTAGAGATTTTAGAAGAAGCAAAAAGAAAATCGGAATCGA  | 1352032 |

|       |         |                                                                   |         |
|-------|---------|-------------------------------------------------------------------|---------|
| Query | 26      | TCGACTGTAAAAAAGAAATGCGGAAGAGATTTTGGGAGAGGCCAAAAGGCCAAAACCGGAATTGG | 85      |
|       |         |                                                                   |         |
| Sbjct | 1357390 | TCGATTGTAAAAAAAACGCGGTAGAGATTTTAGAAGAAGCAAAAAGAAAATCGGAATCGA      | 1357449 |
| Query | 86      | TTCAAACCTTTGGATTTTGGAAATGCAGAAGTTGTCCACGGTTCGGAAGAAGTTTGC GGTT    | 145     |
|       |         |                                                                   |         |
| Sbjct | 1357450 | TTCAAATCTTAGATTTAGGAATGCAAAAGTTAACCTCGATTCCAGAAGGAGTTTGCCTCTT     | 1357509 |
| Query | 146     | TTCCGAATTTAAACCAAGTTGGATCTTCGTTTAAACAGTTTGACTTTTCTTCCGGAATTTA     | 205     |
|       |         |                                                                   |         |
| Sbjct | 1357510 | TTCCGAATTTGACTCAGCTGGATTTACGTTTGAACAGTTTGAATTCTCTTCTCGGTTGGA      | 1357569 |
| Query | 206     | TCGGAGAATGTAAACGCCTTGAACAACCTTAATCTTTTCGGGAACGACCTTACAACATTTTC    | 265     |
|       |         |                                                                   |         |
| Sbjct | 1357570 | TTGGAGCTTGTAAAAATCTGGAACAAATTAACCTTTTCGGAATGATCTAAATACGGTTTC      | 1357629 |
| Query | 266     | CGTCTACGTTTTTCTAAATTAAAAAATCTGAAAGTGTTACTGGCGGGAAATAACGATTTTA     | 325     |

|       |         |                                                              |         |
|-------|---------|--------------------------------------------------------------|---------|
| Sbjct | 1357630 | CATCTTCTTTTTCTAAATTAAAGAATTTGAAAGTATTGCTCTTGGGTAATAACGATTTTA | 1357689 |
| Query | 326     | CGATTCTACCCCTCCGAACTTTGTTCCTTCCGTTGATCAAAATTCTATACGTAGATCGGA | 385     |
| Sbjct | 1357690 | CTTTTCTACCTTCGGAACTTTGTTCCTGCCTTTGATTAAAACCTGTACTTGGATCAAA   | 1357749 |
| Query | 386     | ATAAATTAACCTCTAACGGAAACGGATGTGGAAATTCTCGCTTCTCTTTCCCTTGGAGG  | 445     |
| Sbjct | 1357750 | ACAAGCTTACGTTGACCGAAACGGATGTTGAAATTCTAGCTTCTCTTTCCAGTTTGAAG  | 1357809 |
| Query | 446     | AATTGGATCTGAGTCTGAATTCGGGGATTAAGGCGCTCCCTTTTAATTACGAAAAACTTG | 505     |
| Sbjct | 1357810 | AATTGGATCTTAATTTGAACTCTGGAATTAAAGTGCTTCTTCTAACTATAATAAATTGA  | 1357869 |
| Query | 506     | TAAATCTCATTAATCTAAAAAGATTGAATATTaaaaaaCTTCATTAAAGGGAGAGGATG  | 565     |
| Sbjct | 1357870 | AAAATCTGACTCATTTAAAAAGATTGAATATTAAAAAACTTCATTAAAGGGAGAAGATG  | 1357929 |
| Query | 566     | CAGATAAAATTGCAGGCGATTCTTCCAAATACCAAAATCGACTACTGA             | 612     |
| Sbjct | 1357930 | CTGATAAAATTACAAGCAGTTCTCCCAAAATACAAGAATAGACTATTGA            | 1357976 |

[illegible]

|       |         |                                                              |         |
|-------|---------|--------------------------------------------------------------|---------|
| Sbjct | 3467444 | AATTGGATCTTAATTTGAACTCTGGAATTAAGTGCTTCCTTCTAACTATAATAAATTGA  | 3467503 |
| Query | 506     | TAAATCTCATTAATCTAAAAAGATTGAATATTaaaaaaaCTTCATTAAAGGGAGAGGATG | 565     |
|       |         |                                                              |         |
| Sbjct | 3467504 | AAAATCTGACTCATTTAAAAAGATTGAATATTAAAAAAACTTCATTAAAGGGAGAAGATG | 3467563 |
| Query | 566     | CAGATAAATTGCAGGCGATTCTTCCAAATACCAAATCGACTACTGA               | 612     |
|       |         |                                                              |         |
| Sbjct | 3467564 | CTGATAAATTACAAGCAGTTCTCCCAAATACAAGAATAGACTATTGA              | 3467610 |

>Leptospira interrogans strain FMAS\_PN3 chromosome 1, complete sequence  
Sequence ID: CP092663.1 Length: 4263490  
Range 1: 2862050 to 2862636

Score:478 bits(529), Expect:3e-133,  
Identities:458/587(78%), Gaps:0/587(0%), Strand: Plus/Minus

|       |         |                                                                |         |
|-------|---------|----------------------------------------------------------------|---------|
| Query | 26      | TCGACTGTAAAAAGAATGCGGAAGAGATTTTGGGAGAGGCCAAAGGCCAAACCGGAATTGG  | 85      |
|       |         |                                                                |         |
| Sbjct | 2862636 | TCGATTGTAAAAAAACGCGGTAGAGATTTTAGAAGAAGCAAAAAGAAAATCGGAATCGA    | 2862577 |
| Query | 86      | TTCAAACCTTTGGATTTTGAATGCAGAAGTTGTCCACGGTTCCGGAAGAAGTTTGCGGTT   | 145     |
|       |         |                                                                |         |
| Sbjct | 2862576 | TTCAAATCTTAGATTTAGGAATGCAAAAGTTAACCTCGATTCCAGAAGGAGTTTGCTCTT   | 2862517 |
| Query | 146     | TTCCGAATTTAACCAAGTTGGATCTTCGTTTAAACAGTTTGACTTTTCTTCCGGAATTTA   | 205     |
|       |         |                                                                |         |
| Sbjct | 2862516 | TTCCGAATTTGACTCAGCTGGATTTACGTTTGAACAGTTTGAATTCTCTTCTGTTGGA     | 2862457 |
| Query | 206     | TCGGAGAATGTAAACGCCTTGAACAACCTTAATCTTTTCGGGAACGACCTTACAACATTTTC | 265     |
|       |         |                                                                |         |
| Sbjct | 2862456 | TTGGAGCTTGTA AAAATCTGGAACAAATTAACCTTTTCGGAAATGATCTAAATACGGTTTC | 2862397 |
| Query | 266     | CGTCTACGTTTTTCTAAATTAAAAAATCTGAAAGTGTTACTGGCGGGAAATAACGATTTTA  | 325     |
|       |         |                                                                |         |
| Sbjct | 2862396 | CATCTTCTTTTTTCTAAATTAAAGAATTTGAAAGTATTGCTCTTGGGTAATAACGATTTTA  | 2862337 |
| Query | 326     | CGATTCTACCCTCCGAACCTTTTGTTTCTTCCGTTGATCAAAATTCTATACGTAGATCGGA  | 385     |
|       |         |                                                                |         |
| Sbjct | 2862336 | CTTTTCTACCTTCGGAACCTTTTGTTTCTGCCTTTGATTAAACCCTGTACTTGGATCAAA   | 2862277 |
| Query | 386     | ATAAATTAACCTCTAACGGAAACGGATGTGGAAATTCTCGCTTCTCTTTCTCCTTGGAGG   | 445     |
|       |         |                                                                |         |
| Sbjct | 2862276 | ACAAGCTTACGTTGACCGAAACGGATGTTGAAATTCTAGCTTCTCTTTCCAGTTTGAAG    | 2862217 |
| Query | 446     | AATTGGATCTGAGTCTGAATTCGGGGATTAAGGCGCTCCCTTTTAATTACGAAAACTTG    | 505     |
|       |         |                                                                |         |
| Sbjct | 2862216 | AATTGGATCTTAATTTGAACTCTGGAATCAAAGTGCTTCCTTCTAATTATAATAAATTGA   | 2862157 |
| Query | 506     | TAAATCTCATTAATCTAAAAAGATTGAATATTaaaaaaaCTTCATTAAAGGGAGAGGATG   | 565     |
|       |         |                                                                |         |
| Sbjct | 2862156 | AAAATCTGACTCATTTAAAAAGATTGAATATTAAAAAAACTTCATTAAAGGGGAGGATG    | 2862097 |
| Query | 566     | CAGATAAATTGCAGGCGATTCTTCCAAATACCAAATCGACTACTGA                 | 612     |
|       |         |                                                                |         |
| Sbjct | 2862096 | CTGATAAATTACAAGCAGTTCTCCCAAATACAAGAATAGACTATTGA                | 2862050 |



>Leptospira interrogans strain FMAS\_AP1 chromosome 1, complete sequence

Sequence ID: CP092681.1 Length: 4281936

Range 1: 2877199 to 2877785

Score:478 bits(529), Expect:3e-133,  
Identities:458/587(78%), Gaps:0/587(0%), Strand: Plus/Minus

|       |         |                                                               |         |
|-------|---------|---------------------------------------------------------------|---------|
| Query | 26      | TCGACTGTAAAAAGAATGCGGAAGAGATTTTGGGAGAGGCAAAGGCAAAACCGGAATTGG  | 85      |
|       |         |                                                               |         |
| Sbjct | 2877785 | TCGATTGTAAAAAAAACGCGGTAGAGATTTTAGAAGAAGCAAAAAGAAAATCGGAATCGA  | 2877726 |
| Query | 86      | TTCAAACCTTTGGATTTTGAATGCAGAAGTTGTCCACGGTTCCGGAAGAAGTTTGC GGTT | 145     |
|       |         |                                                               |         |
| Sbjct | 2877725 | TTCAAATCTTAGATTTAGGAATGCAAAAGTTAACCTCGATTCCAGAAGGAGTTTGCTCTT  | 2877666 |
| Query | 146     | TTCCGAATTTAACCAAGTTGGATCTTCGTTTAAACAGTTTGACTTTTCTTCCGGAATTTA  | 205     |
|       |         |                                                               |         |
| Sbjct | 2877665 | TTCCGAATTTGACTCAGCTGGATTTACGTTTGAACAGTTTGAATTCTCTTCTCGTTTGA   | 2877606 |
| Query | 206     | TCGGAGAATGTAAACGCCTTGAACAACCTTAATCTTTTCGGGAACGACCTTACAACATTTT | 265     |
|       |         |                                                               |         |
| Sbjct | 2877605 | TTGGAGCTTGTA AAAATCTGGAACAAATTAACCTTTTCGGAAATGATCTAAATACGGTTC | 2877546 |
| Query | 266     | CGTCTACGTTTTCTAAATTAAAAAATCTGAAAGTGTTACTGGCGGGAAATAACGATTTTA  | 325     |
|       |         |                                                               |         |
| Sbjct | 2877545 | CATCTTCTTTTTCTAAATTAAAGAATTTGAAAGTATTGCTCTTGGGTAATAACGATTTTA  | 2877486 |
| Query | 326     | CGATTCTACCCTCCGAACCTTTGTTTCTTCGTTGATCAAAATTCTATACGTAGATCGGA   | 385     |
|       |         |                                                               |         |
| Sbjct | 2877485 | CTTTTCTACCTTCGGAACCTTTGTTTCTGCCTTTGATTAAACCCTGTACTTGGATCAAA   | 2877426 |
| Query | 386     | ATAAATTAACCTCTAACGGAAACGGATGTGGAAATTCTCGCTTCTCTTTCCTCCTTGGAGG | 445     |
|       |         |                                                               |         |
| Sbjct | 2877425 | ACAAGCTTACGTTGACCGAAACGGATGTTGAAATTCTAGCTTCTCTTTCAGTTTGAAG    | 2877366 |
| Query | 446     | AATTGGATCTGAGTCTGAATTCGGGGATTAAGGCGCTCCCTTTTAATTACGAAAACTTG   | 505     |
|       |         |                                                               |         |
| Sbjct | 2877365 | AATTGGATCTTAATTTGAACCTCTGGAATCAAGTGCTTCCTTCTAATTATAATAAATTGA  | 2877306 |
| Query | 506     | TAAATCTCATTAATCTAAAAAGATTGAATATTaaaaaaCTTCATTAAAGGGAGAGGATG   | 565     |
|       |         |                                                               |         |
| Sbjct | 2877305 | AAAATCTGACTCATTTAAAAAGATTGAATATTAAAAAACTTCATTAAAGGGGGAGGATG   | 2877246 |
| Query | 566     | CAGATAAATTGCAGGCGATTCTTCCAAATACCAAAATCGACTACTGA               | 612     |
|       |         |                                                               |         |
| Sbjct | 2877245 | CTGATAAATTACAAGCAGTTCTCCCAAATACAAGAATAGACTATTGA               | 2877199 |

>Leptospira interrogans strain FMAS\_AP7 chromosome 1, complete sequence

Sequence ID: CP092152.1 Length: 4298104

Range 1: 4193201 to 4193787

Score:478 bits(529), Expect:3e-133,  
Identities:458/587(78%), Gaps:0/587(0%), Strand: Plus/Minus

|       |         |                                                               |         |
|-------|---------|---------------------------------------------------------------|---------|
| Query | 26      | TCGACTGTAAAAAGAATGCGGAAGAGATTTTGGGAGAGGCAAAGGCAAAACCGGAATTGG  | 85      |
|       |         |                                                               |         |
| Sbjct | 4193787 | TCGATTGTAAAAAAAACGCGGTAGAGATTTTAGAAGAAGCAAAAAGAAAATCGGAATCGA  | 4193728 |
| Query | 86      | TTCAAACCTTTGGATTTTGAATGCAGAAGTTGTCCACGGTTCCGGAAGAAGTTTGC GGTT | 145     |
|       |         |                                                               |         |

|       |         |                                                               |         |
|-------|---------|---------------------------------------------------------------|---------|
| Sbjct | 4193727 | TTCAAATCTTAGATTTAGGAATGCAAAAGTTAACCTCGATTCCAGAAGGAGTTTGCTCTT  | 4193668 |
| Query | 146     | TTCCGAATTTAACCAAGTTGGATCTTCGTTTAAACAGTTTGACTTTTCTTCCGAATTTA   | 205     |
|       |         |                                                               |         |
| Sbjct | 4193667 | TTCCGAATTTGACTCAGCTGGATTTACGTTTGAACAGTTTGAATTCTCTTCTGTTGGA    | 4193608 |
| Query | 206     | TCGGAGAATGTAAACGCCTTGAACAACCTTAATCTTTTCGGGAACGACCTTACAACATTTT | 265     |
|       |         |                                                               |         |
| Sbjct | 4193607 | TTGGAGCTTGTA AAAATCTGGAACAAATTAACCTTTTCGGAAATGATCTAAATACGGTTC | 4193548 |
| Query | 266     | CGTCTACGTTTTCTAAATTA AAAAATCTGAAAGTGTTACTGGCGGGAAATAACGATTTTA | 325     |
|       |         |                                                               |         |
| Sbjct | 4193547 | CATCTTCTTTTCTAAATTAAGAATTTGAAAGTATTGCTCTTGGGTAATAACGATTTTA    | 4193488 |
| Query | 326     | CGATTCTACCCTCCGAACCTTTGTTTCTTCGTTGATCAAAATTCTATACGTAGATCGGA   | 385     |
|       |         |                                                               |         |
| Sbjct | 4193487 | CTTTTCTACCTTCGGAACCTTTGTTTCTGCCTTTGATTAAACCCTGTACTTGGATCAAA   | 4193428 |
| Query | 386     | ATAAATTAACCTCTAACGGAAACGGATGTGGAAATTCTCGCTTCTCTTCTCCTTGGAGG   | 445     |
|       |         |                                                               |         |
| Sbjct | 4193427 | ACAAGCTTACGTTGACCGAAACGGATGTTGAAATTCTAGCTTCTCTTCCAGTTTGGAAG   | 4193368 |
| Query | 446     | AATTGGATCTGAGTCTGAATTCGGGGATTAAGGCGCTCCCTTTTAATTACGAAAACTTG   | 505     |
|       |         |                                                               |         |
| Sbjct | 4193367 | AATTGGATCTTAATTTGAACCTCTGGAATCAAAGTGCTTCTCTTAATTATAATAAATTGA  | 4193308 |
| Query | 506     | TAAATCTCATTAAATCTAAAAAGATTGAATATTaaaaaaCTTCATTAAAGGGAGAGGATG  | 565     |
|       |         |                                                               |         |
| Sbjct | 4193307 | AAAATCTGACTCATTTAAAAAGATTGAATATTAAAAAACTTCATTAAAGGGGGAGGATG   | 4193248 |
| Query | 566     | CAGATAAATTGCAGGCGATTCTTCCAAATACCAAATCGACTACTGA                | 612     |
|       |         |                                                               |         |
| Sbjct | 4193247 | CTGATAAATTACAAGCAGTTCTCCCAAATACAAGAATAGACTATTGA               | 4193201 |

>Leptospira interrogans serovar Bataviae strain D64 chromosome I, complete sequence  
Sequence ID: CP077942.1 Length: 4355742  
Range 1: 1430617 to 1431203

Score:478 bits(529), Expect:3e-133,  
Identities:458/587(78%), Gaps:0/587(0%), Strand: Plus/Plus

|       |         |                                                               |         |
|-------|---------|---------------------------------------------------------------|---------|
| Query | 26      | TCGACTGTAAAAAGAATGCGGAAGAGATTTGGGAGAGGCAAAGGCAAAACCGGAATTGG   | 85      |
|       |         |                                                               |         |
| Sbjct | 1430617 | TCGATTGTAAAAAAACGCGGTAGAGATTTAGAGAAGCAAAAAGAAAATCGGAATCGA     | 1430676 |
| Query | 86      | TTCAAACCTTTGGATTTTGAATGCAGAAGTTGTCCACGGTTCCGGAAGAAGTTTGCGGTT  | 145     |
|       |         |                                                               |         |
| Sbjct | 1430677 | TTCAAATCTTAGATTTAGGAATGCAAAAGTTAACCTCGATTCCAGAAGGAGTTTGCTCTT  | 1430736 |
| Query | 146     | TTCCGAATTTAACCAAGTTGGATCTTCGTTTAAACAGTTTGACTTTTCTTCCGAATTTA   | 205     |
|       |         |                                                               |         |
| Sbjct | 1430737 | TTCCGAATTTGACTCAGCTGGATTTACGTTTGAACAGTTTGAATTCTCTTCTGTTGGA    | 1430796 |
| Query | 206     | TCGGAGAATGTAAACGCCTTGAACAACCTTAATCTTTTCGGGAACGACCTTACAACATTTT | 265     |
|       |         |                                                               |         |
| Sbjct | 1430797 | TTGGAGCTTGTA AAAATCTGGAACAAATTAACCTTTTCGGAAATGATCTAAATACGGTTC | 1430856 |
| Query | 266     | CGTCTACGTTTTCTAAATTA AAAAATCTGAAAGTGTTACTGGCGGGAAATAACGATTTTA | 325     |
|       |         |                                                               |         |
| Sbjct | 1430857 | CATCTTCTTTTCTAAATTAAGAATTTGAAAGTATTGCTCTTGGGTAATAACGATTTTA    | 1430916 |

|       |         |                                                                 |         |
|-------|---------|-----------------------------------------------------------------|---------|
| Query | 326     | CGATTCTACCCTCCGAAC TTTTGT TTTCTTCCGTTGATCAAAATTCTATACGTAGATCGGA | 385     |
|       |         |                                                                 |         |
| Sbjct | 1430917 | CTTTTCTACCCTCGGAAC TTTTGT TTTCTGCCTTTGATTA AAACCTGTACTTGGATCAAA | 1430976 |
| Query | 386     | ATAAATTAAC TCTAACGGAACGGATGTGGAAATTCTCGCTTCTCTTTCTCCTTGGAGG     | 445     |
|       |         |                                                                 |         |
| Sbjct | 1430977 | ACAAGCTTACGTTGACCGAAACGGATGTTGAAATTCTAGCTTCTCTTTCCAGTTTGAAG     | 1431036 |
| Query | 446     | AATTGGATCTGAGTCTGAATTCGGGGATTAAGGCGCTCCCTTTTAATTACGAAAACTTG     | 505     |
|       |         |                                                                 |         |
| Sbjct | 1431037 | AATTGGATCTTAATTTGAACTCTGGAATCAAAGTGCTTCCTTCTAACTATAATAAATTGA    | 1431096 |
| Query | 506     | TAAATCTCATTAATCTAAAAAGATTGAATATTaaaaaaaCTTCATTAAAGGGAGAGGATG    | 565     |
|       |         |                                                                 |         |
| Sbjct | 1431097 | AAAATCTGACTCATTTAAAAAGATTGAATATTAAAAAACTTCATTAAAGGGGGAGGATG     | 1431156 |
| Query | 566     | CAGATAAATTGCAGGCGATTCTTCCAAATACCAAATCGACTACTGA                  | 612     |
|       |         |                                                                 |         |
| Sbjct | 1431157 | CTGATAAATTACAAGCAGTTCTCCCAAATACAAGAATAGACTATTGA                 | 1431203 |

>Leptospira interrogans serovar Bataviae strain 1548 chromosome, complete genome  
Sequence ID: CP043880.1 Length: 4354848  
Range 1: 1430028 to 1430614

Score:478 bits(529), Expect:3e-133,  
Identities:458/587(78%), Gaps:0/587(0%), Strand: Plus/Plus

|       |         |                                                                 |         |
|-------|---------|-----------------------------------------------------------------|---------|
| Query | 26      | TCGACTGTAAAAAG AATGCGGAAGAGATTTTGGGAGAGGCCAAAGGCAAACCGGAATTGG   | 85      |
|       |         |                                                                 |         |
| Sbjct | 1430028 | TCGATTGTAAAAAAACGCGGTAGAGATTTTAGAAGAAGCAAAAAGAAAATCGGAATCGA     | 1430087 |
| Query | 86      | TTCAAAC TTTGGATTTTGG AATGCAGAAGTTGTCCACGGTTCCGGAAGAAGTTTGC GGTT | 145     |
|       |         |                                                                 |         |
| Sbjct | 1430088 | TTCAAATCTTAGATTTAGGAATGCAAAGTTAACCTCGATTCCAGAAGGAGTTTGCTCTT     | 1430147 |
| Query | 146     | TTCCGAATTTTAACCAAGTTGGATCTTCGTTTAAACAGTTTGACTTTTCTTCCGGAATTTA   | 205     |
|       |         |                                                                 |         |
| Sbjct | 1430148 | TTCCGAATTTGACTCAGCTGGATTTACGTTTGAACAGTTTGAATTCTCTTCTGTTGGA      | 1430207 |
| Query | 206     | TCGGAGAATGTAAACGCCTTGAACAAC TTAATCTTTTCGGGAACGACCTTACAACATTTTC  | 265     |
|       |         |                                                                 |         |
| Sbjct | 1430208 | TTGGAGCTTGTA AAAATCTGGAACAAATTAAC TTTTCGGAAATGATCTAAATACGGTTC   | 1430267 |
| Query | 266     | CGTCTACGTTTTTCTAAATTA AAAAATCTGAAAGTGTTACTGGCGGGAAATAACGATTTTA  | 325     |
|       |         |                                                                 |         |
| Sbjct | 1430268 | CATCTTCTTTTTTCTAAATTAAGAATTTGAAAGTATTGCTCTTGGGTAATAACGATTTTA    | 1430327 |
| Query | 326     | CGATTCTACCCTCCGAAC TTTTGT TTTCTTCCGTTGATCAAAATTCTATACGTAGATCGGA | 385     |
|       |         |                                                                 |         |
| Sbjct | 1430328 | CTTTTCTACCCTCGGAAC TTTTGT TTTCTGCCTTTGATTA AAACCTGTACTTGGATCAAA | 1430387 |
| Query | 386     | ATAAATTAAC TCTAACGGAACGGATGTGGAAATTCTCGCTTCTCTTTCTCCTTGGAGG     | 445     |
|       |         |                                                                 |         |
| Sbjct | 1430388 | ACAAGCTTACGTTGACCGAAACGGATGTTGAAATTCTAGCTTCTCTTTCCAGTTTGAAG     | 1430447 |
| Query | 446     | AATTGGATCTGAGTCTGAATTCGGGGATTAAGGCGCTCCCTTTTAATTACGAAAACTTG     | 505     |
|       |         |                                                                 |         |
| Sbjct | 1430448 | AATTGGATCTTAATTTGAACTCTGGAATCAAAGTGCTTCCTTCTAACTATAATAAATTGA    | 1430507 |

|       |         |                                                                 |         |
|-------|---------|-----------------------------------------------------------------|---------|
| Query | 506     | TAAATCTCATTAATCTAAAAAGATTGAATATTaaaaaaaCTTCATTAAAGGGGAGAGGATG   | 565     |
| Sbjct | 1430508 | AAAATCTGACTCATTATAAAAAAGATTGAATATTAAAAAAAACTTCATTAAAGGGGGAGGATG | 1430567 |
| Query | 566     | CAGATAAATTGCAGGCGATTCTTCCAAATACCAAAATCGACTACTGA                 | 612     |
| Sbjct | 1430568 | CTGATAAATTACAAGCAGTTCTCCCAAATACAAGAATAGACTATTGA                 | 1430614 |

Score:474 bits(525), Expect:4e-132,  
Identities:458/587(78%), Gaps:1/587(0%), Strand: Plus/Plus

>Leptospira interrogans strain FMAS\_KW2 chromosome I, complete sequence  
Sequence ID: CP039256.1 Length: 4293951



|       |         |                                                                |         |
|-------|---------|----------------------------------------------------------------|---------|
| Query | 146     | TTCCGAATTTTAACCAAGTTGGATCTTCGTTTAAACAGTTTGACTTTTCTTCCGGAATTTA  | 205     |
|       |         |                                                                |         |
| Sbjct | 2850819 | TTCCGAATTTGACTCAGCTGGATTTACGTTTGAACAGTTTGAATTCTCTTCCTGGTTGGA   | 2850760 |
| Query | 206     | TCGGAGAATGTAAACGCCTTGAACAACCTTAATCTTTTCGGGAACGACCTTACAACATTTTC | 265     |
|       |         |                                                                |         |
| Sbjct | 2850759 | TTGGAGCTTGTA AAAATCTGGAACAAATTAACCTTTTCGGAAATGATCTAAATACTGTTC  | 2850700 |
| Query | 266     | CGTCTACGTTTTCTAAATTA AAAAATCTGAAAGTGTTACTGGCGGGAAATAACGATTTTA  | 325     |
|       |         |                                                                |         |
| Sbjct | 2850699 | CATCTTCTTTTTCTAAATTAAGAATTTGAAAGTATTGCTCTTGGGTAATAACGATTTTA    | 2850640 |
| Query | 326     | CGATTCTACCCTCCGAACCTTTTGTTTCTTCCGTTGATCAAAATTCTATACGTAGATCGGA  | 385     |
|       |         |                                                                |         |
| Sbjct | 2850639 | CTTTTCTACCCTCGGAACCTTTTGTTTCTGCCTTTGCTTAAACCCTGTACTTGGATCAAA   | 2850580 |
| Query | 386     | ATAAATTAACCTCTAACGGAAACGGATGTGGAAATTCTCGCTTCTCTTTCTCCTTGGAGG   | 445     |
|       |         |                                                                |         |
| Sbjct | 2850579 | ACAAGCTTACGTTGACTGAAACGGATGTTGAAATTCTAGCTTCTCTTTTCAGTTTGGAAG   | 2850520 |
| Query | 446     | AATTGGATCTGAGTCTGAATTCGGGGATTAAGGCGCTCCCTTTTAATTACGAAAACTTG    | 505     |
|       |         |                                                                |         |
| Sbjct | 2850519 | AATTGGATCTTAATTTGAACTCTGGAATCAAAGTGCTTCCTTCTAACTATAATAAATTGA   | 2850460 |
| Query | 506     | TAAATCTCATTAATCTAAAAAGATTGAATATTaaaaaaaCTTCATTAAAGGGAGAGGATG   | 565     |
|       |         |                                                                |         |
| Sbjct | 2850459 | AAAATCTGACTCATTTAAAAAGATTGAATATTAAAAAACTTCATTAAAGGGGGAGGATG    | 2850400 |
| Query | 566     | CAGATAAATTGCAGGCGATTCTTCCAAATACCAAATCGACTACTGA                 | 612     |
|       |         |                                                                |         |
| Sbjct | 2850399 | CTGATAAATTACAAGCAGTTCTCCCAAATACAAAATAGACTATTGA                 | 2850353 |

>Leptospira interrogans serovar Manilae strain UP-MMC-NIID LP chromosome 1, complete sequence

Sequence ID: CP011931.1 Length: 4238972

Range 1: 2850352 to 2850938

Score:473 bits(524), Expect:4e-132,  
Identities:457/587(78%), Gaps:0/587(0%), Strand: Plus/Minus

|       |         |                                                                |         |
|-------|---------|----------------------------------------------------------------|---------|
| Query | 26      | TCGACTGTAAAAAGAATGCGGAAGAGATTTTGGGAGAGGCAAAGGCAAAACCGGAATTGG   | 85      |
|       |         |                                                                |         |
| Sbjct | 2850938 | TCGATTGTAAAAAAACGCGGTAGAGATTTTAGAAGAAGCAAAAAGAAAATCGGAATCGA    | 2850879 |
| Query | 86      | TTCAAACCTTTGGATTTTGAATGCAGAAGTTGTCCACGGTTCCGGAAGAAGTTTGCGGTT   | 145     |
|       |         |                                                                |         |
| Sbjct | 2850878 | TTCAAATCTTAGATTTAGGAATGCAAAAGTTAACCTCGATTCCAGAAGGAGTTTGCTCTT   | 2850819 |
| Query | 146     | TTCCGAATTTTAACCAAGTTGGATCTTCGTTTAAACAGTTTGACTTTTCTTCCGGAATTTA  | 205     |
|       |         |                                                                |         |
| Sbjct | 2850818 | TTCCGAATTTGACTCAGCTGGATTTACGTTTGAACAGTTTGAATTCTCTTCCTGGTTGGA   | 2850759 |
| Query | 206     | TCGGAGAATGTAAACGCCTTGAACAACCTTAATCTTTTCGGGAACGACCTTACAACATTTTC | 265     |
|       |         |                                                                |         |
| Sbjct | 2850758 | TTGGAGCTTGTA AAAATCTGGAACAAATTAACCTTTTCGGAAATGATCTAAATACTGTTC  | 2850699 |
| Query | 266     | CGTCTACGTTTTCTAAATTA AAAAATCTGAAAGTGTTACTGGCGGGAAATAACGATTTTA  | 325     |
|       |         |                                                                |         |
| Sbjct | 2850698 | CATCTTCTTTTTCTAAATTAAGAATTTGAAAGTATTGCTCTTGGGTAATAACGATTTTA    | 2850639 |

|       |         |                                                               |         |
|-------|---------|---------------------------------------------------------------|---------|
| Query | 326     | CGATTCTACCCTCCGAAC TTTTGTTCCTCCGTTGATCAAAATTCTATACGTAGATCGGA  | 385     |
|       |         |                                                               |         |
| Sbjct | 2850638 | CTTTTCTACCCTCGGAAC TTTTGTTCCTGCCTTTGCTTAAACCCCTGTACTTGGATCAAA | 2850579 |
| Query | 386     | ATAAATTAAC TCTAACGGAAACGGATGTGGAAATTCTCGCTTCTCTTTCTCCTTGGAGG  | 445     |
|       |         |                                                               |         |
| Sbjct | 2850578 | ACAAGCTTACGTTGACTGAAACGGATGTTGAAATTCTAGCTTCTCTTTTCAGTTTGAAG   | 2850519 |
| Query | 446     | AATTGGATCTGAGTCTGAATTCGGGGATTAAGGCGCTCCCTTTTAATTACGAAAACTTG   | 505     |
|       |         |                                                               |         |
| Sbjct | 2850518 | AATTGGATCTTAATTTGAACTCTGGAATCAAAGTGCTTCCTTCTAACTATAATAAATTGA  | 2850459 |
| Query | 506     | TAAATCTCATTAATCTAAAAAGATTGAATATTaaaaaaaCTTCATTAAAGGGAGAGGATG  | 565     |
|       |         |                                                               |         |
| Sbjct | 2850458 | AAAATCTGACTCATTTAAAAAGATTGAATATTAAAAAACTTCATTAAAGGGGGAGGATG   | 2850399 |
| Query | 566     | CAGATAAATTGCAGGCGATTCTTCCAAATACCAAATCGACTACTGA                | 612     |
|       |         |                                                               |         |
| Sbjct | 2850398 | CTGATAAATTACAAGCAGTTCTCCCAAATACAAAATAGACTATTGA                | 2850352 |

>Leptospira interrogans strain FMAS\_RT2 chromosome 1, complete sequence  
Sequence ID: CP092166.1 Length: 4342805  
Range 1: 2179558 to 2180144

Score:473 bits(524), Expect:4e-132,  
Identities:457/587(78%), Gaps:0/587(0%), Strand: Plus/Minus

|       |         |                                                                 |         |
|-------|---------|-----------------------------------------------------------------|---------|
| Query | 26      | TCGACTGTAAAAAGAATGCGGAAGAGATTTTGGGAGAGGCCAAAGGCAAACCGGAATTGG    | 85      |
|       |         |                                                                 |         |
| Sbjct | 2180144 | TCGATTGTAAAAAAACGCGGTAGAGATTTTAGAAGAAGCAAAAAGAAAATCGGAATCGA     | 2180085 |
| Query | 86      | TTCAAAC TTTGGATTTTGGGAATGCAGAAGTTGTCCACGGTTCCGGAAGAAGTTTGC GGTT | 145     |
|       |         |                                                                 |         |
| Sbjct | 2180084 | TTCAAATCTTAGATTTAGGAATGCAAAAGTTAACCTCGATTCCAGAAGGAGTTTGCTCTT    | 2180025 |
| Query | 146     | TTCCGAATTTTAACCAAGTTGGATCTTCGTTTAAACAGTTTGACTTTTCTTCCGGAATTTA   | 205     |
|       |         |                                                                 |         |
| Sbjct | 2180024 | TTCCGAATTTGACTCAGCTGGATTTACGTTTGAACAGTTTGAATTCTCTTCTGTTGGA      | 2179965 |
| Query | 206     | TCGGAGAATGTAAACGCCTTGAACAAC TTAATCTTTTCGGGAACGACCTTACAACATTTTC  | 265     |
|       |         |                                                                 |         |
| Sbjct | 2179964 | TTGGAGCTTGTA AAAATCTGGAACAAATTAAC TTTTCGGAAATGATCTAAATACGGTTC   | 2179905 |
| Query | 266     | CGTCTACGTTTTCTAAATTA AAAAATCTGAAAGTGTTACTGGCGGGAAATAACGATTTTA   | 325     |
|       |         |                                                                 |         |
| Sbjct | 2179904 | CATCTTCTTTTCTAAATTAAGAATTTGAAAGTATTGCTCTTGGGTAATAACGATTTTA      | 2179845 |
| Query | 326     | CGATTCTACCCTCCGAAC TTTTGTTCCTCCGTTGATCAAAATTCTATACGTAGATCGGA    | 385     |
|       |         |                                                                 |         |
| Sbjct | 2179844 | CTTTTCTACCTTCGGAAC TTTTGTTCCTGCCTTTGATTA AAACCCCTGTACTTGGATCAAA | 2179785 |
| Query | 386     | ATAAATTAAC TCTAACGGAAACGGATGTGGAAATTCTCGCTTCTCTTTCTCCTTGGAGG    | 445     |
|       |         |                                                                 |         |
| Sbjct | 2179784 | ACAAGCTTACGTTGACTGAAACGGATGTTGAAATTCTAGCTTCTCTTTCCAGTTTGAAG     | 2179725 |
| Query | 446     | AATTGGATCTGAGTCTGAATTCGGGGATTAAGGCGCTCCCTTTTAATTACGAAAACTTG     | 505     |
|       |         |                                                                 |         |
| Sbjct | 2179724 | AATTGGATCTTAATTTGAACTCTGGAATCAAAGTGCTTCCTTCTAATTATAATAAATTGA    | 2179665 |

|       |         |                                                                |         |
|-------|---------|----------------------------------------------------------------|---------|
| Query | 506     | TAAATCTCATTAATCTAAAAAGATTGAATATTaaaaaaaCTTCATTAAAGGGGAGAGGATG  | 565     |
| Sbjct | 2179664 | AAAATCTGACTCATT'TAAAAAGATTGAATATTAAAAAAAACTTCATTAAAGGGGGAGGACG | 2179605 |
| <br>  |         |                                                                |         |
| Query | 566     | CAGATAAATTGCAGGCCGATTCTTCCAAATACC AAAATCGACTACTGA              | 612     |
| Sbjct | 2179604 | CTGATAAATTACAAGCAGTTCTCCCAAATACAAGAATAGACTATTGA                | 2179558 |





|       |         |                                                                |         |
|-------|---------|----------------------------------------------------------------|---------|
| Query | 146     | TTCCGAATTTAACCAAGTTGGATCTTCGTTTAAACAGTTTGACTTTTCTTCCGGAATTTA   | 205     |
|       |         |                                                                |         |
| Sbjct | 2909862 | TTCCGAATTTGACTCAGCTGGATTTACGTTTGAACAGTTTGAATTCTCTTCCTGTTTGA    | 2909803 |
| Query | 206     | TCGGAGAATGTAAACGCCTTGAACAACCTTAATCTTTTCGGGAACGACCTTACAACATTTTC | 265     |
|       |         |                                                                |         |
| Sbjct | 2909802 | TTGGAGCTTGTA AAAATCTGGAACAAATTAACCTTTTCGGAAATGATCTAAATACGGTTC  | 2909743 |
| Query | 266     | CGTCTACGTTTTCTAAATTA AAAAATCTGAAAGTGTTACTGGCGGGAAATAACGATTTTA  | 325     |
|       |         |                                                                |         |
| Sbjct | 2909742 | CATCTTCTTTTTCTAAATTAAGAATTTGAAAGTATTACTCTTGGGTAATAACGATTTTA    | 2909683 |
| Query | 326     | CGATTCTACCCTCCGAAC TTTTGTTTCTTCGTTGATCAAAATTCTATACGTAGATCGGA   | 385     |
|       |         |                                                                |         |
| Sbjct | 2909682 | CTTTTCTACCTTCGGAAC TTTTGTTTCTGCCTTTGCTTAAACCTGTATTTGGATCAAA    | 2909623 |
| Query | 386     | ATAAATTAACCTCTAACGGAAACGGATGTGGAAATTCTCGCTTCTCTTTCTCCTTGGAGG   | 445     |
|       |         |                                                                |         |
| Sbjct | 2909622 | ACAAGCTTACGTTGACTGAAACGGATGTTGAAATTCTAGCTTCTCTTTCCAGTTTGGAAG   | 2909563 |
| Query | 446     | AATTGGATCTGAGTCTGAATTCGGGGATTAAGGCGCTCCCTTTTAATTACGAAAACTTG    | 505     |
|       |         |                                                                |         |
| Sbjct | 2909562 | AATTGGATCTTAATTTGAACTCTGGAATCAAAGTGCTTCCTTCTAACTATAATAAATTGA   | 2909503 |
| Query | 506     | TAAATCTCATTAATCTAAAAAGATTGAATATTaaaaaaaCTTCATTAAAGGGAGAGGATG   | 565     |
|       |         |                                                                |         |
| Sbjct | 2909502 | AAAATCTGACTCATTTAAAAAGATTGAATATTAAAAAACTTCATTAAAGGGGGAGGATG    | 2909443 |
| Query | 566     | CAGATAAATTGCAGGCGATTCTTCCAAATACCAAATCGACTACTGA                 | 612     |
|       |         |                                                                |         |
| Sbjct | 2909442 | CTGATAAATTACAAGCAGTTCTCCCAAATACAAGAATAGACTATTGA                | 2909396 |

>Leptospira interrogans strain R12 chromosome 1  
Sequence ID: CP047508.1 Length: 4223477  
Range 1: 2872427 to 2873013

Score:469 bits(519), Expect:2e-130,  
Identities:456/587(78%), Gaps:0/587(0%), Strand: Plus/Minus

|       |         |                                                                |         |
|-------|---------|----------------------------------------------------------------|---------|
| Query | 26      | TCGACTGTAAAAAGAAATGCGGAAGAGATTTTGGGAGAGGCCAAAGGCAAAACCGGAATTGG | 85      |
|       |         |                                                                |         |
| Sbjct | 2873013 | TCGATTGTAAAAAAAACGCGGTAGAGATTTTAGAAGAAGCAAAAAGAAAATCGGAATCGA   | 2872954 |
| Query | 86      | TTCAAAC TTTGGATTTTGGAAATGCAGAAGTTGTCCACGGTTCCGGAAGAAGTTTGCGGTT | 145     |
|       |         |                                                                |         |
| Sbjct | 2872953 | TTCAAATCTTAGATTTAGGAATGCAAAAGTTAACCTCGATTCCAGAAGGAGTTTGCTCTT   | 2872894 |
| Query | 146     | TTCCGAATTTAACCAAGTTGGATCTTCGTTTAAACAGTTTGACTTTTCTTCCGGAATTTA   | 205     |
|       |         |                                                                |         |
| Sbjct | 2872893 | TTCCGAATTTGACTCAGCTGGATTTACGTTTGAACAGTTTGAATTCTCTTCCTGTTTGA    | 2872834 |
| Query | 206     | TCGGAGAATGTAAACGCCTTGAACAACCTTAATCTTTTCGGGAACGACCTTACAACATTTTC | 265     |
|       |         |                                                                |         |
| Sbjct | 2872833 | TTGGAGCTTGTA AAAATCTGGAACAAATTAACCTTTTCGGAAATGATCTAAATACGGTTC  | 2872774 |
| Query | 266     | CGTCTACGTTTTCTAAATTA AAAAATCTGAAAGTGTTACTGGCGGGAAATAACGATTTTA  | 325     |
|       |         |                                                                |         |
| Sbjct | 2872773 | CATCTTCTTTTTCTAAATTAAGAATTTGAAAGTATTACTCTTGGGTAATAACGATTTTA    | 2872714 |
| Query | 326     | CGATTCTACCCTCCGAAC TTTTGTTTCTTCGTTGATCAAAATTCTATACGTAGATCGGA   | 385     |

|       |         |                                                              |         |
|-------|---------|--------------------------------------------------------------|---------|
| Sbjct | 2872713 | CTTTTCTACCTTCGGAACCTTTTGTCTGCCTTTGCTTAAACCCCTGTATTTGGATCAAA  | 2872654 |
| Query | 386     | ATAAATTAACCTCTAACGGAAACGGATGTGGAAATTCTCGCTTCTCTTTCTCCTTGGAGG | 445     |
| Sbjct | 2872653 | ACAAGCTTACGTTGACTGAAACGGATGTTGAAATTCTAGCTTCTCTTTCCAGTTTGGAAG | 2872594 |
| Query | 446     | AATTGGATCTGAGTCTGAATTCGGGGATTAAGGCGCTCCCTTTTAATTACGAAAACTTG  | 505     |
| Sbjct | 2872593 | AATTGGATCTTAATTTGAACTCTGGAATCAAAGTGCTTCCTTCTAACTATAATAAATTGA | 2872534 |
| Query | 506     | TAAATCTCATTAATCTAAAAAGATTGAATATTaaaaaaaCTTCATTAAAGGGAGAGGATG | 565     |
| Sbjct | 2872533 | AAAATCTGACTCATTTAAAAAGATTGAATATTAAAAAACTTCATTAAAGGGGGAGGATG  | 2872474 |
| Query | 566     | CAGATAAATTGCAGGCGATTCTTCCAAATACCAAATCGACTACTGA               | 612     |
| Sbjct | 2872473 | CTGATAAATTACAAGCAGTTCTCCCAAATACAAGAATAGACTATTGA              | 2872427 |

>Leptospira interrogans strain R19 chromosome 1  
Sequence ID: CP047514.1 Length: 4213431  
Range 1: 2873903 to 2874489

Score:469 bits(519), Expect:2e-130,  
Identities:456/587(78%), Gaps:0/587(0%), Strand: Plus/Minus

|       |         |                                                               |         |
|-------|---------|---------------------------------------------------------------|---------|
| Query | 26      | TCGACTGTAAAAAGAATGCGGAAGAGATTTTGGGAGAGGCCAAAGGCAAACCGGAATTGG  | 85      |
| Sbjct | 2874489 | TCGATTGTAAAAAAACGCGGTAGAGATTTTAGAAGAAGCAAAAAGAAAATCGGAATCGA   | 2874430 |
| Query | 86      | TTCAAACCTTTGGATTTTGAATGCAGAAGTTGTCCACGGTTCCGGAAGAAGTTTGCGGTT  | 145     |
| Sbjct | 2874429 | TTCAAATCTTAGATTTAGGAATGCAAAAGTTAACCTCGATTCCAGAAGGAGTTTGCTCTT  | 2874370 |
| Query | 146     | TTCCGAATTTAACCAAGTTGGATCTTCGTTTAAACAGTTTGACTTTTCTTCCGGAATTTA  | 205     |
| Sbjct | 2874369 | TTCCGAATTTGACTCAGCTGGATTTACGTTTGAACAGTTTGAATTCTCTTCTGTTGGA    | 2874310 |
| Query | 206     | TCGGAGAATGTAAACGCCTTGAACAACCTTAATCTTTTCGGGAACGACCTTACAACATTTT | 265     |
| Sbjct | 2874309 | TTGGAGCTTGTA AAAATCTGGAACAAATTAACCTTTTCGGAAATGATCTAAATACGGTTC | 2874250 |
| Query | 266     | CGTCTACGTTTTCTAAATTA AAAAATCTGAAAGTGTTACTGGCGGGAAATAACGATTTTA | 325     |
| Sbjct | 2874249 | CATCTTCTTTTCTAAATTAAGAATTTGAAAGTATTACTCTTGGGTAATAACGATTTTA    | 2874190 |
| Query | 326     | CGATTCTACCCTCCGAACCTTTTGTCTTCCGTTGATCAAAATTCTATACGTAGATCGGA   | 385     |
| Sbjct | 2874189 | CTTTTCTACCTTCGGAACCTTTTGTCTTGCCTTTGCTTAAACCCCTGTATTTGGATCAAA  | 2874130 |
| Query | 386     | ATAAATTAACCTCTAACGGAAACGGATGTGGAAATTCTCGCTTCTCTTTCTCCTTGGAGG  | 445     |
| Sbjct | 2874129 | ACAAGCTTACGTTGACTGAAACGGATGTTGAAATTCTAGCTTCTCTTTCCAGTTTGGAAG  | 2874070 |
| Query | 446     | AATTGGATCTGAGTCTGAATTCGGGGATTAAGGCGCTCCCTTTTAATTACGAAAACTTG   | 505     |
| Sbjct | 2874069 | AATTGGATCTTAATTTGAACTCTGGAATCAAAGTGCTTCCTTCTAACTATAATAAATTGA  | 2874010 |
| Query | 506     | TAAATCTCATTAATCTAAAAAGATTGAATATTaaaaaaaCTTCATTAAAGGGAGAGGATG  | 565     |

|       |         |                                                                |         |
|-------|---------|----------------------------------------------------------------|---------|
| Sbjct | 2874009 | AAAAATCTGACTCATTTTAAAAAAGATTGAATATTAAAAAACTTCATTAAAGGGGGAGGATG | 2873950 |
| Query | 566     | CAGATAAAATTGCAGGCGATTCTTCCAAAATACCAAAATCGACTACTGA              | 612     |
|       |         |                                                                |         |
| Sbjct | 2873949 | CTGATAAAATTACAAGCAGTTCTCCCAAATACAAGAATAGACTATTGA               | 2873903 |

Score:469 bits(519), Expect:2e-130,  
Identities:456/587(78%), Gaps:0/587(0%), Strand: Plus/Minus

```
>Leptospira interrogans strain R11 chromosome 1
Sequence ID: CP047510.1 Length: 4214328
Range 1: 2865468 to 2866054
```

|       |         |                                                                    |         |
|-------|---------|--------------------------------------------------------------------|---------|
| Query | 26      | TCGACTGTAAAAAGAATGCGGAAGAGATTTTGGGAGAGGCCAAAGGCCAAAACCGGAATTGG<br> | 85      |
| Sbjct | 2866054 | TCGATTGTAAAAAAAACGCGGTAGAGATTTTAGAAGAAGCAAAAAGAAAATCGGAATCGA       | 2865995 |
| Query | 86      | TTCAAACTTTGGATTTTGGGAATGCAGAAGTTGTCCACGGTTCCGGAAGAAGTTTGCGGTT<br>  | 145     |
| Sbjct | 2865994 | TTCAAATCTTAGATTTAGGAATGCAAAAGTTAACCTCGATTCCAGAAGGAGTTTGCTCTT       | 2865935 |
| Query | 146     | TTCCGAATTTAACCAAGTTGGATCTTCGTTTAAACAGTTTGACTTTTCTTCCGGAATTTA<br>   | 205     |
| Sbjct | 2865934 | TTCCGAATTTGACTCAGCTGGATTTACGTTTGAACAGTTTGAATTCTCTTCCTGGTTGGA       | 2865875 |
| Query | 206     | TCGGAGAATGTAAACGCCTTGAACAACTTAATCTTTTCGGGAACGACCTTACAACATTTTC<br>  | 265     |
| Sbjct | 2865874 | TTGGAGCTTGTAAAAATCTGGAACAAATTAACCTTTTCGGAAATGATCTAAATACGGTTC       | 2865815 |
| Query | 266     | CGTCTACGTTTTCTAAATTAAAAAATCTGAAAGTGTTACTGGCGGGAAATAACGATTTTA<br>   | 325     |
| Sbjct | 2865814 | CATCTTCTTTTTCTAAATTAAAGAATTTGAAAGTATTACTCTTGGGTAATAACGATTTTA       | 2865755 |
| Query | 326     | CGATTCTACCCTCCGAACTTTTGTTTCTTCCGTTGATCAAAATTCTATACGTAGATCGGA<br>   | 385     |
| Sbjct | 2865754 | CTTTTCTACCTTCGGAACTTTTGTTTCTGCCTTTGCTTAAAACCCTGTATTTGGATCAAA       | 2865695 |
| Query | 386     | ATAAATTAACCTCTAACGGAAACGGATGTGGAAATTCCTCGCTTCTCTTTCCTCCTTGGAGG<br> | 445     |
| Sbjct | 2865694 | ACAAGCTTACGTTGACTGAAACGGATGTTGAAATTCCTAGCTTCTCTTTCAGTTTGAAG        | 2865635 |
| Query | 446     | AATTGGATCTGAGTCTGAATTCGGGGATTAAAGGCGCTCCCTTTTAATTACGAAAAACTTG<br>  | 505     |
| Sbjct | 2865634 | AATTGGATCTTAATTTGAACTCTGGAATCAAAGTGC'TTCC'TTCTAACTATAATAAATTGA     | 2865575 |
| Query | 506     | TAAATCTCATTAATCTAAAAAGATTGAATATTaaaaaaaCTTCATTAAAGGGAGAGGATG<br>   | 565     |
| Sbjct | 2865574 | AAAATCTGACTCATTTAAAAAGATTGAATATTAAAAAACTTCATTAAAGGGGGAGGATG        | 2865515 |
| Query | 566     | CAGATAAATTGCAGGCGATTCTTCCAAATACCAAATCGACTACTGA 612<br>             |         |
| Sbjct | 2865514 | CTGATAAATTACAAGCAGTTCTCCCAAATACAAGAATAGACTATTGA 2865468            |         |

>Leptospira interrogans strain R13-L chromosome 1  
Sequence ID: CP047518.1 Length: 4233607  
Range 1: 2882682 to 2883268

|       |         |                                                                |         |
|-------|---------|----------------------------------------------------------------|---------|
| Query | 26      | TCGACTGTAAAAAGAATGCGGAAGAGATTTTGGGAGAGGCCAAAGGCCAAAACCGGAATTGG | 85      |
|       |         |                                                                |         |
| Sbjct | 2883268 | TCGATTGTAAAAAAACGCGGTAGAGATTTTAGAAGAAGCAAAAAGAAAATCGGAATCGA    | 2883209 |
| Query | 86      | TTCAAACCTTTGGATTTTGGAAATGCAGAAGTTGTCCACGGTTCGGAAGAAGTTTGC GGTT | 145     |
|       |         |                                                                |         |
| Sbjct | 2883208 | TTCAAATCTTAGATTTAGGAATGCAAAGTTAACCTCGATTCCAGAAGGAGTTTGCTCTT    | 2883149 |
| Query | 146     | TTCCGAATTTAACCAAGTTGGATCTTCGTTTAAACAGTTTGACTTTTCTCCGGAATTTA    | 205     |
|       |         |                                                                |         |



|       |         |                                                              |         |
|-------|---------|--------------------------------------------------------------|---------|
| Query | 386     | ATAAAATAACTCTAACGGAAACGGATGTGGAAATTCTCGTTCTCTTTCTCCTTGGAGG   | 445     |
|       |         |                                                              |         |
| Sbjct | 2875060 | ACAAGCTTACGTTGACTGAAACGGATGTTGAAATTCTAGCTTCTCTTTCCAGTTTGAAG  | 2875001 |
| Query | 446     | AATTGGATCTGAGTCTGAATTCGGGGATTAAGGCGCTCCCTTTTAATTACGAAAAACTTG | 505     |
|       |         |                                                              |         |
| Sbjct | 2875000 | AATTGGATCTTAATTTGAACTCTGGAATCAAAGTGCTTCTTCTAACTATAATAAATTGA  | 2874941 |
| Query | 506     | TAAATCTCATTAATCTAAAAAGATTGAATATTaaaaaaaCTTCATTAAAGGGAGAGGATG | 565     |
|       |         |                                                              |         |
| Sbjct | 2874940 | AAAATCTGACTCATTTAAAAAGATTGAATATTAAAAAACTTCATTAAAGGGGGAGGATG  | 2874881 |
| Query | 566     | CAGATAAATTGCAGGCGATTCTTCCAAATACCAAAATCGACTACTGA              | 612     |
|       |         |                                                              |         |
| Sbjct | 2874880 | CTGATAAATTACAAGCAGTTCTCCCAAATACAAGAATAGACTATTGA              | 2874834 |

Score:469 bits(519), Expect:2e-130,  
Identities:456/587(78%), Gaps:0/587(0%), Strand: Plus/Minus

```

Query   566      CAGATAAATTGCAGGCGATTCTTCCAAATACCAAATCGACTACTGA   612
          ||||| ||| || ||| ||||| ||| ||| ||||| |||
Sbjct   2865339  CTGATAAATTACAAGCAGTTCTCCCAAATACAAGAATAGACTATTGA   2865293

```

>Leptospira interrogans strain R22 chromosome 1  
Sequence ID: CP047496.1 Length: 4206042  
Range 1: 2873918 to 2874504

Score:469 bits(519), Expect:2e-130,  
Identities:456/587(78%), Gaps:0/587(0%), Strand: Plus/Minus

```

Query   26      TCGACTGTAAAAAGAATGCGGAAGAGATTTTGGGAGAGGCCAAAGGCAAACCGGAATTGG   85
          |||| | ||||| || |||| | ||||| ||| ||| ||||| |||
Sbjct   2874504  TCGATTGTAAAAAAACGCGGTAGAGATTTTAGAAGAAGCAAAAAGAAAATCGGAATCGA   2874445

Query   86      TTCAAACCTTTGGATTTTGAATGCAGAAGTTGTCCACGGTTCCGGAAGAAGTTTGCGGTT   145
          ||||| || ||||| ||||| ||||| ||| ||| ||||| ||||| |||
Sbjct   2874444  TTCAATCTTAGATTTAGGAATGCAAAGTTAACCTCGATTCCAGAAGGAGTTTGCTCTT   2874385

Query   146     TTCCGAATTTAACCAAGTTGGATCTTCGTTTAAACAGTTTGACTTTTCTTCCGGAATTTA   205
          ||||| ||| || ||||| || ||||| ||||| ||| ||||| |||
Sbjct   2874384  TTCCGAATTTGACTCAGCTGGATTTACGTTTGAACAGTTTGAATTCTCTTCTGTTGGA   2874325

Query   206     TCGGAGAATGTAAACGCCTTGAACAACCTAATCTTTTCGGGAACGACCTTACAACATTTT   265
          || |||| | ||||| || ||||| ||| ||||| ||| ||| |||
Sbjct   2874324  TTGGAGCTTGTA AAAATCTGGAACAAATTAACCTTTTCGGAAATGATCTAAATACGGTTC   2874265

Query   266     CGTCTACGTTTTCTAAATTAAAAAATCTGAAAGTGTTACTGGCGGGAAATAACGATTTTA   325
          || ||| | ||||| ||||| ||| ||||| ||||| ||| ||||| |||||
Sbjct   2874264  CATCTTCTTTTTCTAAATTAAAGAATTTGAAAGTATTACTCTTGGGTAATAACGATTTTA   2874205

Query   326     CGATTCTACCCTCCGAACCTTTTGTCTTCCGTTGATCAAAATTCTATACGTAGATCGGA   385
          | ||||| || ||||| ||||| || ||| ||||| ||| ||| |||||
Sbjct   2874204  CTTTTCTACCTTCGGAACCTTTTGTCTTGCCTTTGCTTAAACCCTGTATTTGGATCAAA   2874145

Query   386     ATAAATTAACCTCTAACGGAAACGGATGTGGAAATTCTCGCTTCTCTTTCTCCTTGGAGG   445
          || | || | || ||||| ||||| ||||| ||||| ||||| |||||
Sbjct   2874144  ACAAGCTTACGTTGACTGAAACGGATGTTGAAATTCTAGCTTCTCTTTCCAGTTTGGAAG   2874085

Query   446     AATTGGATCTGAGTCTGAATTCGGGGATTAAGGCGCTCCCTTTTAATTACGAAAACTTG   505
          ||||| ||||| || |||| | ||| ||| ||| ||||| ||| ||| |||
Sbjct   2874084  AATTGGATCTTAATTTGAACCTCTGGAATCAAAGTGCTTCTTCTAACTATAATAAATTGA   2874025

Query   506     TAAATCTCATTAACTCTAAAAAGATTGAATATTaaaaaaaCTTCATTAAAGGGGAGGATG   565
          ||||| || | || ||||| ||||| ||||| ||||| ||||| |||||
Sbjct   2874024  AAAATCTGACTCATTTAAAAAGATTGAATATTAAAAAACTTCATTAAAGGGGGAGGATG   2873965

Query   566      CAGATAAATTGCAGGCGATTCTTCCAAATACCAAATCGACTACTGA   612
          ||||| ||| || ||| ||||| ||| ||| ||||| |||
Sbjct   2873964  CTGATAAATTACAAGCAGTTCTCCCAAATACAAGAATAGACTATTGA   2873918

```

>Leptospira interrogans strain R21 chromosome 1  
Sequence ID: CP047498.1 Length: 4214555  
Range 1: 2874543 to 2875129

Score:469 bits(519), Expect:2e-130,  
Identities:456/587(78%), Gaps:0/587(0%), Strand: Plus/Minus



|       |         |                                                               |         |
|-------|---------|---------------------------------------------------------------|---------|
| Query | 26      | TCGACTGTAAAAAGAATGCGGAAGAGATTTTGGGAGAGGCAAAGGCAAACCGGAATTGG   | 85      |
|       |         |                                                               |         |
| Sbjct | 2875129 | TCGATTGTAAAAAAACGCGGTAGAGATTTTAGAAGAAGCAAAAAGAAAATCGGAATCGA   | 2875070 |
| Query | 86      | TTCAAACCTTTGGATTTTGAATGCAGAAGTTGTCCACGGTTCCGGAAGAAGTTTGCGGTT  | 145     |
|       |         |                                                               |         |
| Sbjct | 2875069 | TTCAAATCTTAGATTTAGGAATGCAAAGTTAACCTCGATTCCAGAAGGAGTTTGCTCTT   | 2875010 |
| Query | 146     | TTCCGAATTTAACCAAGTTGGATCTTCGTTTAAACAGTTTGACTTTTCTTCCGGAATTTA  | 205     |
|       |         |                                                               |         |
| Sbjct | 2875009 | TTCCGAATTTGACTCAGCTGGATTTACGTTTGAACAGTTTGAATTCTCTTCTGTTTGA    | 2874950 |
| Query | 206     | TCGGAGAATGTAAACGCCTTGAACAACCTTAATCTTTTCGGAACGACCTTACAACATTTTC | 265     |
|       |         |                                                               |         |
| Sbjct | 2874949 | TTGGAGCTTGTA AAAATCTGGAACAAATTAACCTTTTCGGAATGATCTAAATACGGTTC  | 2874890 |
| Query | 266     | CGTCTACGTTTTCTAAATTA AAAAATCTGAAAGTGTTACTGGCGGGAAATAACGATTTTA | 325     |
|       |         |                                                               |         |
| Sbjct | 2874889 | CATCTTCTTTTTCTAAATTAAGAATTTGAAAGTATTACTCTTGGGTAATAACGATTTTA   | 2874830 |
| Query | 326     | CGATTCTACCTCCGAACCTTTTGTTTCTTCCGTTGATCAAAATTCTATACGTAGATCGGA  | 385     |
|       |         |                                                               |         |
| Sbjct | 2874829 | CTTTTCTACCTTCGGAACCTTTTGTTTCTGCCTTTGCTTAAACCTGTATTTGGATCAAA   | 2874770 |
| Query | 386     | ATAAATTAACCTCTAACGGAAACGGATGTGGAAATTCTCGCTTCTCTTTCTCCTTGGAGG  | 445     |
|       |         |                                                               |         |
| Sbjct | 2874769 | ACAAGCTTACGTTGACTGAAACGGATGTTGAAATTCTAGCTTCTCTTTCCAGTTTGAAG   | 2874710 |
| Query | 446     | AATTGGATCTGAGTCTGAATTCGGGGATTAAGGCGCTCCCTTTTAATTACGAAAACTTG   | 505     |
|       |         |                                                               |         |
| Sbjct | 2874709 | AATTGGATCTTAATTTGAACTCTGGAATCAAAGTGCTTCCTTCTAACTATAATAAATTGA  | 2874650 |
| Query | 506     | TAAATCTCATTAATCTAAAAAGATTGAATATTaaaaaaaCTTCATTAAAGGGAGAGGATG  | 565     |
|       |         |                                                               |         |
| Sbjct | 2874649 | AAAATCTGACTCATTTAAAAAGATTGAATATTAAAAAACTTCATTAAAGGGGGAGGATG   | 2874590 |
| Query | 566     | CAGATAAATTGCAGGCGATTCTTCCAAATACCAAATCGACTACTGA                | 612     |
|       |         |                                                               |         |
| Sbjct | 2874589 | CTGATAAATTACAAGCAGTTCTCCCAAATACAAGAATAGACTATTGA               | 2874543 |

>Leptospira interrogans strain R16 chromosome 1  
Sequence ID: CP047502.1 Length: 4213648  
Range 1: 2865029 to 2865615

Score:469 bits(519), Expect:2e-130,  
Identities:456/587(78%), Gaps:0/587(0%), Strand: Plus/Minus

|       |         |                                                              |         |
|-------|---------|--------------------------------------------------------------|---------|
| Query | 26      | TCGACTGTAAAAAGAATGCGGAAGAGATTTTGGGAGAGGCAAAGGCAAACCGGAATTGG  | 85      |
|       |         |                                                              |         |
| Sbjct | 2865615 | TCGATTGTAAAAAAACGCGGTAGAGATTTTAGAAGAAGCAAAAAGAAAATCGGAATCGA  | 2865556 |
| Query | 86      | TTCAAACCTTTGGATTTTGAATGCAGAAGTTGTCCACGGTTCCGGAAGAAGTTTGCGGTT | 145     |
|       |         |                                                              |         |
| Sbjct | 2865555 | TTCAAATCTTAGATTTAGGAATGCAAAGTTAACCTCGATTCCAGAAGGAGTTTGCTCTT  | 2865496 |
| Query | 146     | TTCCGAATTTAACCAAGTTGGATCTTCGTTTAAACAGTTTGACTTTTCTTCCGGAATTTA | 205     |
|       |         |                                                              |         |
| Sbjct | 2865495 | TTCCGAATTTGACTCAGCTGGATTTACGTTTGAACAGTTTGAATTCTCTTCTGTTTGA   | 2865436 |

|       |         |                                                               |         |
|-------|---------|---------------------------------------------------------------|---------|
| Query | 206     | TCGAGAGATGTAAACGCCTTGAACAACTTAATCTTTTCGGGAACGACCTTACAACATTTTC | 265     |
|       |         |                                                               |         |
| Sbjct | 2865435 | TTGGAGCTTGTA AAAATCTGGAACAAATTAACCTTTTCGGAATGATCTAAATACGGTTC  | 2865376 |
| Query | 266     | CGTCTACGTTTTCTAAATTAAAAAATCTGAAAAGTGTTACTGGCGGGAAATAACGATTTTA | 325     |
|       |         |                                                               |         |
| Sbjct | 2865375 | CATCTTCTTTTTCTAAATTAAAGAATTTGAAAAGTATTACTCTTGGGTAATAACGATTTTA | 2865316 |
| Query | 326     | CGATTCTACCCTCCGAAC TTTGTTTCTTCCGTTGATCAAAAT TCTATACGTAGATCGGA | 385     |
|       |         |                                                               |         |
| Sbjct | 2865315 | CTTTTCTACCTTCGGAAC TTTGTTTCTGCCTTTGCTTAA AACCTGTATTTGGATCAAA  | 2865256 |
| Query | 386     | ATAAATTAAC TCTAACGGAACGGATGTGGAAAT TCTCGCTTCTCTTTCTCCTTGGAGG  | 445     |
|       |         |                                                               |         |
| Sbjct | 2865255 | ACAAGCTTACGTTGACTGAAACGGATGTGAAAT TCTAGCTTCTCTTTCCAGTTTGAAG   | 2865196 |
| Query | 446     | AATTGGATCTGAGTCTGAATTCGGGGATTAAGGCGCTCCCTTTTAATTACGAAAAACTTG  | 505     |
|       |         |                                                               |         |
| Sbjct | 2865195 | AATTGGATCTTAATTTGAACTCTGGAATCAAAGTGCTTCTTCTAACTATAATAAATTGA   | 2865136 |
| Query | 506     | TAAATCTCATTAATCTAAAAAGATTGAATATTaaaaaaaCTTCATTAAAGGGAGAGGATG  | 565     |
|       |         |                                                               |         |
| Sbjct | 2865135 | AAAATCTGACTCATTTAAAAAGATTGAATATTAAAAAACTTCATTAAAGGGGGAGGATG   | 2865076 |
| Query | 566     | CAGATAAATTGCAGGCGATTCTTCCAAATACCAAAATCGACTACTGA               | 612     |
|       |         |                                                               |         |
| Sbjct | 2865075 | CTGATAAATTACAAGCAGTTCTCCCAAATACAAGAATAGACTATTGA               | 2865029 |

Score:469 bits(519), Expect:2e-130,  
Identities:456/587(78%), Gaps:0/587(0%), Strand: Plus/Plus

|       |         |                                                              |         |
|-------|---------|--------------------------------------------------------------|---------|
| Sbjct | 1437769 | ACAAGCTTACGTTGACCGAAACGGATGTTGAAATTCTAGCTTCTCTTTCCAGTTTGGAAG | 1437828 |
| Query | 446     | AATTGGATCTGAGTCTGAATTCGGGGATTAAGGCGCTCCCTTTTAATTACGAAAACTTG  | 505     |
| Sbjct | 1437829 | AATTGGATCTTAATTTGAACTCTGGAATCAAAGTGCTTCCTTCTAACTATAATAAATTGA | 1437888 |
| Query | 506     | TAAATCTCATTAATCTAAAAAGATTGAATATTaaaaaaaCTTCATTAAAGGGAGAGGATG | 565     |
| Sbjct | 1437889 | AAAATCTGACTCATTTAAAAAGATTGAATATTAAAAAACTTCATTAAAGGGGGAGGATG  | 1437948 |
| Query | 566     | CAGATAAATTGCAGGCGATTCTTCCAAATACCAAATCGACTACTGA               | 612     |
| Sbjct | 1437949 | CTGATAAATTACAAGCAGTTCTCCCAAATACAAGAATAGACTATTGA              | 1437995 |

>Leptospira interrogans strain FMAS\_KW1 chromosome I, complete sequence  
Sequence ID: CP039258.1 Length: 4306144  
Range 1: 1377410 to 1377996

Score:469 bits(519), Expect:2e-130,  
Identities:456/587(78%), Gaps:0/587(0%), Strand: Plus/Plus

|       |         |                                                                |         |
|-------|---------|----------------------------------------------------------------|---------|
| Query | 26      | TCGACTGTAAAAAGAATGCGGAAGAGATTTTGGGAGAGGCCAAAGGCAAAACCGGAATTGG  | 85      |
| Sbjct | 1377410 | TCGATTGTAAAAAAACGCGGTAGAGATTTTAGAAGAAGCAAAAAGAAAATCGGAATCGA    | 1377469 |
| Query | 86      | TTCAAACCTTTGGATTTTGAATGCAGAAGTTGTCCACGGTTCCGGAAGAAGTTTGCGGTT   | 145     |
| Sbjct | 1377470 | TTCAAATCTTAGATTTAGGAATGCAAAAGTTAACCTCGATTCCAGAAGGAGTTTGCTCTT   | 1377529 |
| Query | 146     | TTCCGAATTTAACCAAGTTGGATCTTCGTTTAAACAGTTTGACTTTTCTTCCGGAATTTA   | 205     |
| Sbjct | 1377530 | TTCCGAATTTGACTCAGCTGGATTTACGTTTGAACAGTTTGAATTCTCTTCTGTTGGA     | 1377589 |
| Query | 206     | TCGGAGAATGTAAACGCCTTGAACAACCTTAATCTTTTCGGGAACGACCTTACAACATTTTC | 265     |
| Sbjct | 1377590 | TTGGGGCTTGTA AAAATCTGGAACAAATTAACCTTTTCGGAAATGATCTAAATACGGTTC  | 1377649 |
| Query | 266     | CGTCTACGTTTTCTAAATTAAAAAATCTGAAAGTGTTACTGGCGGGAAATAACGATTTTA   | 325     |
| Sbjct | 1377650 | CATCTTCTTTTTCTAAATTAAAGAATTTGAAAGTATTGCTCTTGGGTAATAACGATTTTA   | 1377709 |
| Query | 326     | CGATTCTACCCTCCGAACCTTTGTTTCTTCGTTGATCAAAATTCTATACGTAGATCGGA    | 385     |
| Sbjct | 1377710 | CTTTTCTACCTTCGGAACCTTTGTTTCTGCCTTTGATTAAACCCTGTACTTGGATCAAA    | 1377769 |
| Query | 386     | ATAAATTAACCTCTAACGGAAACGGATGTGGAAATTCTCGCTTCTCTTTCCTCCTTGGAGG  | 445     |
| Sbjct | 1377770 | ACAAGCTTACGTTGACTGAAACGGATGTTGAAATTCTAGCTTCTCTTTCCAGTTTGGAAG   | 1377829 |
| Query | 446     | AATTGGATCTGAGTCTGAATTCGGGGATTAAGGCGCTCCCTTTTAATTACGAAAACTTG    | 505     |
| Sbjct | 1377830 | AATTGGATCTTAATTTGAACTCTGGAATCAAAGTGCTTCCTTCTAATTATAATAAATTGA   | 1377889 |
| Query | 506     | TAAATCTCATTAATCTAAAAAGATTGAATATTaaaaaaaCTTCATTAAAGGGAGAGGATG   | 565     |
| Sbjct | 1377890 | AAAATCTGACTCATTTAAAAAGATTGAATATTAAAAAACTTCATTAAAGGGGGAGGACG    | 1377949 |
| Query | 566     | CAGATAAATTGCAGGCGATTCTTCCAAATACCAAATCGACTACTGA                 | 612     |

Sbjct 1377950 CTGATAAATTACAAGCAGTTCTCCCAAATACAAGAATAGACTATTGA 1377996

>Leptospira interrogans strain FMAS\_AW1 chromosome I, complete sequence  
Sequence ID: CP039283.1 Length: 4497709  
Range 1: 2831793 to 2832379

Score:469 bits(519), Expect:2e-130,  
Identities:456/587(78%), Gaps:0/587(0%), Strand: Plus/Minus

|       |         |                                                                 |         |
|-------|---------|-----------------------------------------------------------------|---------|
| Query | 26      | TCGACTGTAAAAAGAATGCGGAAGAGATTTTGGGAGAGGCCAAAGGCCAAACCGGAATTGG   | 85      |
|       |         |                                                                 |         |
| Sbjct | 2832379 | TCGATTGTAAAAAAACGCGGTAGAGATTTTAGAAGAAGCAAAAAGAAAATCGGAATCGA     | 2832320 |
| Query | 86      | TTCAAACCTTTGGATTTTGGGAATGCAGAAGTTGTCCACGGTTCCGGAAGAAGTTTGC GGTT | 145     |
|       |         |                                                                 |         |
| Sbjct | 2832319 | TTCAAATCTTAGATTTAGGAATGCAAAAGTTAACCTCGATTCCAGAAGGAGTTTGCTCTT    | 2832260 |
| Query | 146     | TTCCGAATTTAACCAAGTTGGATCTTCGTTTAAACAGTTTGACTTTTCTTCCGGAATTTA    | 205     |
|       |         |                                                                 |         |
| Sbjct | 2832259 | TTCCGAATTTGACTCAGCTGGATTTACGTTTGAACAGTTTGAATTCTCTTCTG GTTGA     | 2832200 |
| Query | 206     | TCGGAGAATGTAAACGCCTTGAACAACCTTAATCTTTTCGGGAACGACCTTACAACATTTT   | 265     |
|       |         |                                                                 |         |
| Sbjct | 2832199 | TTGGAGCTTGTAAAAATCTGGAACAAATTAACCTTTTCGGAAATGATCTAAATACGGTTC    | 2832140 |
| Query | 266     | CGTCTACGTTTTCTAAATTAAAAAATCTGAAAGTGTTACTGGCGGGAAATAACGATTTTA    | 325     |
|       |         |                                                                 |         |
| Sbjct | 2832139 | CATCTTCTTTTTCTAAATTAAAGAATTTGAAAGTATTACTCTTGGGTAATAACGATTTTA    | 2832080 |
| Query | 326     | CGATTCTACCCTCCGAACCTTTTGTTTCTTCCGTTGATCAAAATTCTATACGTAGATCGGA   | 385     |
|       |         |                                                                 |         |
| Sbjct | 2832079 | CTTTTCTACCTTCGGAACCTTTTGTTTCTGCCTTTGCTTAAACCCTGTATTTGGATCAAA    | 2832020 |
| Query | 386     | ATAAATTAACCTCTAACGGAAACGGATGTGGAAATTCTCGCTTCTCTTTCCTCCTTGGAGG   | 445     |
|       |         |                                                                 |         |
| Sbjct | 2832019 | ACAAGCTTACGTTGACTGAAACGGATGTTGAAATTCTAGCTTCTCTTTCAGTTTGAAG      | 2831960 |
| Query | 446     | AATTGGATCTGAGTCTGAATTCGGGGATTAAGGCGCTCCCTTTTAATTACGAAAACTTG     | 505     |
|       |         |                                                                 |         |
| Sbjct | 2831959 | AATTGGATCTTAATTTGAACTCTGGAATCAAAGTGCTTCTTCTTAATAATAAATTGA       | 2831900 |
| Query | 506     | TAAATCTCATTAAATCTAAAAAGATTGAATATTaaaaaaaCTTCATTAAAGGGGAGAGGATG  | 565     |
|       |         |                                                                 |         |
| Sbjct | 2831899 | AAAATCTGACTCATTTAAAAAGATTGAATATTAAAAAACTTCATTAAAGGGGGAGGATG     | 2831840 |
| Query | 566     | CAGATAAATTGCAGGCGATTCTTCCAAATACCAAATCGACTACTGA                  | 612     |
|       |         |                                                                 |         |
| Sbjct | 2831839 | CTGATAAATTACAAGCAGTTCTCCCAAATACAAGAATAGACTATTGA                 | 2831793 |

>Leptospira interrogans serovar Copenhageni strain FDAARGOS\_203 chromosome, complete genome  
Sequence ID: CP020414.2 Length: 4280582  
Range 1: 918642 to 919228

Score:469 bits(519), Expect:2e-130,  
Identities:456/587(78%), Gaps:0/587(0%), Strand: Plus/Minus

|       |        |                                                                |        |
|-------|--------|----------------------------------------------------------------|--------|
| Query | 26     | TCGACTGTAAAAAGAATGCGGAAGAGATTTTGGGAGAGGCAAAGGCAAACCGGAATTGG    | 85     |
|       |        |                                                                |        |
| Sbjct | 919228 | TCGATTGTAAAAAAACGCGGTAGAGATTTTAGAAGAAGCAAAAAGAAAATCGGAATCGA    | 919169 |
| Query | 86     | TTCAAACCTTTGGATTTTGAATGCAGAAGTTGTCCACGGTTCCGGAAGAAGTTTGCGGTT   | 145    |
|       |        |                                                                |        |
| Sbjct | 919168 | TTCAAATCTTAGATTTAGGAATGCAAAGTTAACCTCGATTCCAGAAGGAGTTTGCTCTT    | 919109 |
| Query | 146    | TTCCGAATTTAACCAAGTTGGATCTTCGTTTAAACAGTTTGACTTTTCTTCCGGAATTTA   | 205    |
|       |        |                                                                |        |
| Sbjct | 919108 | TTCCGAATTTGACTCAGCTGGATTTACGTTTGAACAGTTTGAATTCTCTTCTGTTGGA     | 919049 |
| Query | 206    | TCGGAGAATGTAAACGCCTTGAACAACCTTAATCTTTTCGGGAACGACCTTACAACATTTT  | 265    |
|       |        |                                                                |        |
| Sbjct | 919048 | TTGGAGCTTGTA AAAATCTGGAACAAATTAACCTTTTCGGAAATGATCTAAATACGGTTC  | 918989 |
| Query | 266    | CGTCTACGTTTTTCTAAATTA AAAAATCTGAAAGTGTTACTGGCGGGAAATAACGATTTTA | 325    |
|       |        |                                                                |        |
| Sbjct | 918988 | CATCTTCTTTTTTCTAAATTAAGAATTTGAAAGTATTACTCTTGGGTAATAACGATTTTA   | 918929 |
| Query | 326    | CGATTCTACCCTCCGAACCTTTTGTCTTCCGTTGATCAAAATTCTATACGTAGATCGGA    | 385    |
|       |        |                                                                |        |
| Sbjct | 918928 | CTTTTCTACCTTCGGAACCTTTTGTCTTGCCTTTGCTTAAACCTGTATTTGGATCAAA     | 918869 |
| Query | 386    | ATAAATTAACCTCTAACGGAACGGATGTGGAAATTCTCGCTTCTCTTTCCTCCTTGAGG    | 445    |
|       |        |                                                                |        |
| Sbjct | 918868 | ACAAGCTTACGTTGACTGAAACGGATGTTGAAATTCTAGCTTCTCTTTCAGTTTGGAAG    | 918809 |
| Query | 446    | AATTGGATCTGAGTCTGAATTCGGGGATTAAGGCGCTCCCTTTTAATTACGAAAACTTG    | 505    |
|       |        |                                                                |        |
| Sbjct | 918808 | AATTGGATCTTAATTTGAACTCTGGAATCAAAGTGCTTCCTTCTAACTATAATAAATTGA   | 918749 |
| Query | 506    | TAAATCTCATTAATCTAAAAAGATTGAATATTaaaaaaaCTTCATTAAAGGGAGAGGATG   | 565    |
|       |        |                                                                |        |
| Sbjct | 918748 | AAAATCTGACTCATTTAAAAAGATTGAATATTAAAAAACTTCATTAAAGGGGGAGGATG    | 918689 |
| Query | 566    | CAGATAAATTGCAGGCGATTCTTCCAAATACCAAATCGACTACTGA                 | 612    |
|       |        |                                                                |        |
| Sbjct | 918688 | CTGATAAATTACAAGCAGTTCTCCCAAATACAAGAATAGACTATTGA                | 918642 |

>Leptospira interrogans strain RCA chromosome I

Sequence ID: CP022538.1 Length: 4241665

Range 1: 3328085 to 3328671

Score:469 bits(519), Expect:2e-130,  
Identities:456/587(78%), Gaps:0/587(0%), Strand: Plus/Minus

|       |         |                                                               |         |
|-------|---------|---------------------------------------------------------------|---------|
| Query | 26      | TCGACTGTAAAAAGAATGCGGAAGAGATTTTGGGAGAGGCAAAGGCAAACCGGAATTGG   | 85      |
|       |         |                                                               |         |
| Sbjct | 3328671 | TCGATTGTAAAAAAACGCGGTAGAGATTTTAGAAGAAGCAAAAAGAAAATCGGAATCGA   | 3328612 |
| Query | 86      | TTCAAACCTTTGGATTTTGAATGCAGAAGTTGTCCACGGTTCCGGAAGAAGTTTGCGGTT  | 145     |
|       |         |                                                               |         |
| Sbjct | 3328611 | TTCAAATCTTAGATTTAGGAATGCAAAGTTAACCTCGATTCCAGAAGGAGTTTGCTCTT   | 3328552 |
| Query | 146     | TTCCGAATTTAACCAAGTTGGATCTTCGTTTAAACAGTTTGACTTTTCTTCCGGAATTTA  | 205     |
|       |         |                                                               |         |
| Sbjct | 3328551 | TTCCGAATTTGACTCAGCTGGATTTACGTTTGAACAGTTTGAATTCTCTTCTGTTGGA    | 3328492 |
| Query | 206     | TCGGAGAATGTAAACGCCTTGAACAACCTTAATCTTTTCGGGAACGACCTTACAACATTTT | 265     |

|       |         |                                                              |         |
|-------|---------|--------------------------------------------------------------|---------|
| Sbjct | 3328491 | TTGGAGCTTGTA AAAATCTGGAACAAATTAACCTTTTCGGAATGATCTAAATACGGTTC | 3328432 |
| Query | 266     | CGTCTACGTTTTCTAAATTAAAAAATCTGAAAGTGTTACTGGCGGGAAATAACGATTTTA | 325     |
| Sbjct | 3328431 | CATCTTCTTTTTCTAAATTAAAGAATTTGAAAGTATTACTCTTGGGTAATAACGATTTTA | 3328372 |
| Query | 326     | CGATTCTACCCTCCGAAC TTTTGTTCCTCCGTTGATCAAAATTCTATACGTAGATCGGA | 385     |
| Sbjct | 3328371 | CTTTTCTACCTTCGGAAC TTTTGTTCCTGCCTTTGCTTAAACCTGTATTTGGATCAAA  | 3328312 |
| Query | 386     | ATAAATTAAC TCTAACGGAAACGGATGTGGAAATTCTCGCTTCTCTTTCTCCTTGGAGG | 445     |
| Sbjct | 3328311 | ACAAGCTTACGTTGACTGAAACGGATGTTGAAATTCTAGCTTCTCTTTCCAGTTTGAAG  | 3328252 |
| Query | 446     | AATTGGATCTGAGTCTGAATTCGGGGATTAAGGCGCTCCCTTTTAATTACGAAAACTTG  | 505     |
| Sbjct | 3328251 | AATTGGATCTTAATTTGAACTCTGGAATCAAAGTGCTTCCTTCTAACTATAATAAATTGA | 3328192 |
| Query | 506     | TAAATCTCATTAATCTAAAAAGATTGAATATTaaaaaaCTTCATTAAAGGGAGAGGATG  | 565     |
| Sbjct | 3328191 | AAAATCTGACTCATTTAAAAAGATTGAATATTAAAAAACTTCATTAAAGGGGGAGGATG  | 3328132 |
| Query | 566     | CAGATAAATTGCAGGCGATTCTTCCAAATACCAAAATCGACTACTGA              | 612     |
| Sbjct | 3328131 | CTGATAAATTACAAGCAGTTCTCCCAAATACAAGAATAGACTATTGA              | 3328085 |

>Leptospira interrogans serovar Hardjo-prajitno strain Hardjoprajitno chromosome 1 sequence

Sequence ID: CP013147.1 Length: 4339653

Range 1: 1431712 to 1432298

Score:469 bits(519), Expect:2e-130,  
Identities:456/587(78%), Gaps:0/587(0%), Strand: Plus/Plus

|       |         |                                                                |         |
|-------|---------|----------------------------------------------------------------|---------|
| Query | 26      | TCGACTGTAAAAAGAATGCGGAAGAGATTTTGGGAGAGGCCAAAGGCAAAACCGGAATTGG  | 85      |
| Sbjct | 1431712 | TCGATTGTAAAAAAACGCGGTAGAGATTTTAGAAGAAGCAAAAAGAAAATCGGAATCGA    | 1431771 |
| Query | 86      | TTCAAAC TTTGGATTTTGAATGCAGAAGTTGTCCACGGTTCCGGAAGAAGTTTGCGGTT   | 145     |
| Sbjct | 1431772 | TTCAAATCTTAGATTTAGGAATGCAAAAGTTAACCTCGATTCCAGAAGGAGTTTGCTCTT   | 1431831 |
| Query | 146     | TTCCGAATTTAACCAAGTTGGATCTTCGTTTAAACAGTTTGACTTTTCTTCCGGAATTTA   | 205     |
| Sbjct | 1431832 | TTCCGAATTTGACTCAGCTGGATTTACGTTTGAACAGTTTGAATTCTCTCCTGGTTGGA    | 1431891 |
| Query | 206     | TCGGAGAATGTAAACGCCTTGAACAAC TTAATCTTTTCGGGAACGACCTTACAACATTTTC | 265     |
| Sbjct | 1431892 | TTGGAGCTTGTA AAAATCTGGAACAAATTAACCTTTTCGGAATGATCTAAATATGGTTC   | 1431951 |
| Query | 266     | CGTCTACGTTTTCTAAATTAAAAAATCTGAAAGTGTTACTGGCGGGAAATAACGATTTTA   | 325     |
| Sbjct | 1431952 | CATCTTCTTTTTCTAAATTAAAGAATTTGAAAGTATTGCTCTTGGGTAATAACGATTTTA   | 1432011 |
| Query | 326     | CGATTCTACCCTCCGAAC TTTTGTTCCTCCGTTGATCAAAATTCTATACGTAGATCGGA   | 385     |
| Sbjct | 1432012 | CTTTTCTACCTTCGGAAC TTTTGTTCCTGCCTTTGATTAAACCTGTACTTGGATCAAA    | 1432071 |
| Query | 386     | ATAAATTAAC TCTAACGGAAACGGATGTGGAAATTCTCGCTTCTCTTTCTCCTTGGAGG   | 445     |

|       |         |                                                              |         |
|-------|---------|--------------------------------------------------------------|---------|
| Sbjct | 1432072 | ACAAGCTTACGTTGACCGAAACGGATGTTGAAATTCTAGCTTCTCTTTCCAGTTTGGAAG | 1432131 |
| Query | 446     | AATTGGATCTGAGTCTGAATTCGGGGATTAAGGCGCTCCCTTTTAATTACGAAAACTTG  | 505     |
| Sbjct | 1432132 | AATTGGATCTTAATTTGAACTCTGGAATCAAAGTGCTTCCTTCTAACTATAATAAATTGA | 1432191 |
| Query | 506     | TAAATCTCATTAATCTAAAAAGATTGAATATTaaaaaaaCTTCATTAAAGGGAGAGGATG | 565     |
| Sbjct | 1432192 | AAAATCTGACTCATTTAAAAAGATTGAATATTAAAAAACTTCATTAAAGGGGGAGGATG  | 1432251 |
| Query | 566     | CAGATAAATTGCAGGCGATTCTTCCAAATACCAAATCGACTACTGA               | 612     |
| Sbjct | 1432252 | CTGATAAATTACAAGCAGTTCTCCCAAATACAAGAATAGACTATTGA              | 1432298 |

>Leptospira interrogans serovar Hardjo str. Norma chromosome I, complete sequence  
Sequence ID: CP012603.1 Length: 4406718  
Range 1: 1409557 to 1410143

Score:469 bits(519), Expect:2e-130,  
Identities:456/587(78%), Gaps:0/587(0%), Strand: Plus/Plus

|       |         |                                                                |         |
|-------|---------|----------------------------------------------------------------|---------|
| Query | 26      | TCGACTGTAAAAAGAATGCGGAAGAGATTTTGGGAGAGGCCAAAGGCAAAACCGGAATTGG  | 85      |
| Sbjct | 1409557 | TCGATTGTAAAAAAACGCGGTAGAGATTTTAGAAGAAGCAAAAAGAAAATCGGAATCGA    | 1409616 |
| Query | 86      | TTCAAACCTTTGGATTTTGAATGCAGAAGTTGTCCACGGTTCCGGAAGAAGTTTGCGGTT   | 145     |
| Sbjct | 1409617 | TTCAAATCTTAGATTTAGGAATGCAAAAGTTAACCTCGATTCCAGAAGGAGTTTGCTCTT   | 1409676 |
| Query | 146     | TTCCGAATTTAACCAAGTTGGATCTTCGTTTAAACAGTTTGACTTTTCTTCCGGAATTTA   | 205     |
| Sbjct | 1409677 | TTCCGAATTTGACTCAGCTGGATTTACGTTTGAACAGTTTGAATTCTCTTCTGTTGGA     | 1409736 |
| Query | 206     | TCGGAGAATGTAAACGCCTTGAACAACCTTAATCTTTTCGGGAACGACCTTACAACATTTTC | 265     |
| Sbjct | 1409737 | TTGGAGCTTGTA AAAATCTGGAACAAATTAACCTTTTCGGAAATGATCTAAATATGGTTC  | 1409796 |
| Query | 266     | CGTCTACGTTTTCTAAATTAAAAAATCTGAAAGTGTTACTGGCGGGAAATAACGATTTTA   | 325     |
| Sbjct | 1409797 | CATCTTCTTTTTCTAAATTAAAGAATTTGAAAGTATTGCTCTTGCGTAATAACGATTTTA   | 1409856 |
| Query | 326     | CGATTCTACCCTCCGAACCTTTGTTTCTTCCGTTGATCAAAATTCTATACGTAGATCGGA   | 385     |
| Sbjct | 1409857 | CTTTTCTACCTTCGGAACCTTTGTTTCTGCCTTTGATTAAACCCTGTACTTGGATCAAA    | 1409916 |
| Query | 386     | ATAAATTAACCTCTAACGGAAACGGATGTGGAAATTCTCGCTTCTCTTTCCTCCTTGGAGG  | 445     |
| Sbjct | 1409917 | ACAAGCTTACGTTGACCGAAACGGATGTTGAAATTCTAGCTTCTCTTTCCAGTTTGGAAG   | 1409976 |
| Query | 446     | AATTGGATCTGAGTCTGAATTCGGGGATTAAGGCGCTCCCTTTTAATTACGAAAACTTG    | 505     |
| Sbjct | 1409977 | AATTGGATCTTAATTTGAACTCTGGAATCAAAGTGCTTCCTTCTAACTATAATAAATTGA   | 1410036 |
| Query | 506     | TAAATCTCATTAATCTAAAAAGATTGAATATTaaaaaaaCTTCATTAAAGGGAGAGGATG   | 565     |
| Sbjct | 1410037 | AAAATCTGACTCATTTAAAAAGATTGAATATTAAAAAACTTCATTAAAGGGGGAGGATG    | 1410096 |
| Query | 566     | CAGATAAATTGCAGGCGATTCTTCCAAATACCAAATCGACTACTGA                 | 612     |





[illegible]





>Leptospira interrogans strain FMAS\_KG2 chromosome 1, complete sequence  
Sequence ID: CP092985.1 Length: 4721761  
Range 1: 3364108 to 3364694

Score:469 bits(519), Expect:2e-130,  
Identities:456/587(78%), Gaps:0/587(0%), Strand: Plus/Minus

|       |         |                                                                 |         |
|-------|---------|-----------------------------------------------------------------|---------|
| Query | 26      | TCGACTGTAAAAAGAATGCGGAAGAGATTTTGGGAGAGGCAAAGGCAAACCGGAATTGG     | 85      |
|       |         |                                                                 |         |
| Sbjct | 3364694 | TCGATTGTAAAAAAACGCGGTAGAGATTTTAGAAGAAGCAAAAAGAAAATCGGAATCGA     | 3364635 |
| Query | 86      | TTCAAACCTTTGGATTTTGGGAATGCAGAAGTTGTCCACGGTTCCGGAAGAAGTTTGC GGTT | 145     |
|       |         |                                                                 |         |
| Sbjct | 3364634 | TTCAAATCTTAGATTTAGGAATGCAAAAGTTAACCTCGATTCCAGAAGGAGTTTGCTCTT    | 3364575 |
| Query | 146     | TTCCGAATTTAACCAAGTTGGATCTTCGTTTAAACAGTTTGACTTTTCTTCCGGAATTTA    | 205     |
|       |         |                                                                 |         |
| Sbjct | 3364574 | TTCCGAATTTGACTCAGCTGGATTTACGTTTGAACAGTTTGAATTCTCTTCTGTTGGA      | 3364515 |
| Query | 206     | TCGGAGAATGTAAACGCCTTGAACAACCTTAATCTTTTCGGGAACGACCTTACAACATTTT   | 265     |
|       |         |                                                                 |         |
| Sbjct | 3364514 | TTGGAGCTTGTA AAAATCTGGAACAAATTAACCTTTTCGGAAATGATCTAAATACGGTTC   | 3364455 |
| Query | 266     | CGTCTACGTTTTCTAAATTA AAAAATCTGAAAGTGTTACTGGCGGGAAATAACGATTTTA   | 325     |
|       |         |                                                                 |         |
| Sbjct | 3364454 | CATCTTCTTTTTCTAAATTAAGAATTTGAAAGTATTGCTCTTGGGTAATAACGATTTTA     | 3364395 |
| Query | 326     | CGATTCTACCCTCCGAACCTTTGTTTCTTCCGTTGATCAAAATTCTATACGTAGATCGGA    | 385     |
|       |         |                                                                 |         |
| Sbjct | 3364394 | CTTTTCTACCTTCGGAACCTTTGTTTCTGCCTTTGCTTAAACCCTGTACTTGGATCAAA     | 3364335 |
| Query | 386     | ATAAATTAACCTCTAACGGAAACGGATGTGGAAATTCTCGCTTCTCTTTCTCCTTGGAGG    | 445     |
|       |         |                                                                 |         |
| Sbjct | 3364334 | ACAAGCTTACGTTGACTGAAACGGATGTTGAAATTCTAGCTTCTCTTTCCAGTTTGGAAG    | 3364275 |
| Query | 446     | AATTGGATCTGAGTCTGAATTCGGGGATTAAGGCGCTCCCTTTTAATTACGAAAACTTG     | 505     |
|       |         |                                                                 |         |
| Sbjct | 3364274 | AATTGGATCTTAATTTGAACTCTGGAATCAAAGTGCTTCTTCTAATAATAAATTGA        | 3364215 |
| Query | 506     | TAAATCTCATTAATCTAAAAAGATTGAATATTaaaaaaaCTTCATTAAAGGGAGAGGATG    | 565     |
|       |         |                                                                 |         |
| Sbjct | 3364214 | AAAATCTGACTCATTTAAAAAGATTGAATATTAAAAAACTTCATTAAAGGGGGAGGATG     | 3364155 |
| Query | 566     | CAGATAAATTGCAGGCGATTCTTCCAAATACCAAATCGACTACTGA                  | 612     |
|       |         |                                                                 |         |
| Sbjct | 3364154 | CTGATAAATTACAAGCAGTTCTCCCAAATACAAGAATAGACTATTGA                 | 3364108 |

>Leptospira interrogans strain FMAS\_PD1 chromosome 1, complete sequence  
Sequence ID: CP092743.1 Length: 4503505  
Range 1: 2921059 to 2921645

Score:469 bits(519), Expect:2e-130,  
Identities:456/587(78%), Gaps:0/587(0%), Strand: Plus/Minus

|       |         |                                                             |         |
|-------|---------|-------------------------------------------------------------|---------|
| Query | 26      | TCGACTGTAAAAAGAATGCGGAAGAGATTTTGGGAGAGGCAAAGGCAAACCGGAATTGG | 85      |
|       |         |                                                             |         |
| Sbjct | 2921645 | TCGATTGTAAAAAAACGCGGTAGAGATTTTAGAAGAAGCAAAAAGAAAATCGGAATCGA | 2921586 |

|       |         |                                                                |         |
|-------|---------|----------------------------------------------------------------|---------|
| Query | 86      | TTCAAACCTTTGGATTTTGGGAATGCAGAAGTTGTCCACGGTTCCGGAAGAAGTTTGC     | 145     |
|       |         |                                                                |         |
| Sbjct | 2921585 | TTCAAATCTTAGATTTAGGAATGCAAAAGTTAACCTCGATTCCAGAAGGAGTTTGCTCTT   | 2921526 |
| Query | 146     | TTCCGAATTTTAACCAAGTTGGATCTTCGTTTAAACAGTTTGACTTTTCTTCCGAATTTA   | 205     |
|       |         |                                                                |         |
| Sbjct | 2921525 | TTCCGAATTTGACTCAGCTGGATTACGTTTGAACAGTTTGAATTCTCTTCTGGTTGGA     | 2921466 |
| Query | 206     | TCGGAGAATGTAAACGCCTTGAACAACTTAATCTTTTCGGGAACGACCTTACAACATTTT   | 265     |
|       |         |                                                                |         |
| Sbjct | 2921465 | TTGGAGCTTGTA AAAATCTGGAACAAATTAACCTTTTCGGAAATGATCTAAATACGGTTC  | 2921406 |
| Query | 266     | CGTCTACGTTTCTAAATTAAAAAATCTGAAAGTGTTACTGGCGGGAAATAACGATTTTA    | 325     |
|       |         |                                                                |         |
| Sbjct | 2921405 | CATCTTCTTTTCTAAATTAAAGAATTTGAAAGTATTGCTCTTGGGTAATAACGATTTTA    | 2921346 |
| Query | 326     | CGATTCTACCCCTCCGAACCTTTTGTTTCTTCCGTTGATCAAAAATCTATACGTAGATCGGA | 385     |
|       |         |                                                                |         |
| Sbjct | 2921345 | CTTTTCTACCTTCGGAACCTTTTGTTTCTGCCTTTGCTTAAACCCTGTACTTGGAATCAA   | 2921286 |
| Query | 386     | ATAAATTAACCTCTAACGGAACGGATGTGGAAATTCCTCGCTTCTCTTTCCTCCTTGAGG   | 445     |
|       |         |                                                                |         |
| Sbjct | 2921285 | ACAAGCTTACGTTGACTGAAACGGATGTTGAAATTCAGCTTCTCTTTCAGTTTGAAG      | 2921226 |
| Query | 446     | AATTGGATCTGAGTCTGAATTCGGGGATTAAAGGCGCTCCCTTTTAATTACGAAAAACTTG  | 505     |
|       |         |                                                                |         |
| Sbjct | 2921225 | AATTGGATCTTAATTTGAACTCTGGAATCAAAGTGCTTCCTTCTAACTATAATAAATTGA   | 2921166 |
| Query | 506     | TAAATCTCATTAATCTAAAAAGATTGAATATTaaaaaaaCTTCATTAAAGGGAGAGGATG   | 565     |
|       |         |                                                                |         |
| Sbjct | 2921165 | AAAATCTGACTCATTTAAAAAGATTGAATATTAAAAAACTTCATTAAAGGGGGAGGATG    | 2921106 |
| Query | 566     | CAGATAAATTGCAGGCGATTCTTCCAAATACCAAAATCGACTACTGA                | 612     |
|       |         |                                                                |         |
| Sbjct | 2921105 | CTGATAAATTACAAGCAGTTCTCCCAAAATACAAGAATAGACTATTGA               | 2921059 |

Score:469 bits(519), Expect:2e-130,  
Identities:456/587(78%), Gaps:0/587(0%), Strand: Plus/Plus

|       |         |                                                              |         |
|-------|---------|--------------------------------------------------------------|---------|
| Query | 266     | CGTCTACGTTTTCTAAATTAATAAATCTGAAAGTGTTACTGGCGGGAAATAACGATTTTA | 325     |
|       |         |                                                              |         |
| Sbjct | 1387840 | CATCTTCTTTTTCTAAATTAAGAATTTGAAAGTATTACTCTTGGGTAATAACGATTTTA  | 1387899 |
| Query | 326     | CGATTCTACCCTCCGAACCTTTTGTCTTCCGTTGATCAAAATTCTATACGTAGATCGGA  | 385     |
|       |         |                                                              |         |
| Sbjct | 1387900 | CTTTTCTACCTTCGGAACCTTTTGTCTTGCCTTTGCTTAAACCCTGTATTTGGATCAAA  | 1387959 |
| Query | 386     | ATAAATTAACCTAACGGAAACGGATGTGGAAATTCTCGCTTCTCTTTCTCCTTGGAGG   | 445     |
|       |         |                                                              |         |
| Sbjct | 1387960 | ACAAGCTTACGTTGACTGAAACGGATGTTGAAATTCTAGCTTCTCTTTCCAGTTTGAAG  | 1388019 |
| Query | 446     | AATTGGATCTGAGTCTGAATTCGGGGATTAAGGCGCTCCCTTTTAATTACGAAAACTTG  | 505     |
|       |         |                                                              |         |
| Sbjct | 1388020 | AATTGGATCTTAATTTGAACTCTGGAATCAAAGTGCTTCCTTCTAACTATAATAAATTGA | 1388079 |
| Query | 506     | TAAATCTCATTAATCTAAAAAGATTGAATATTaaaaaaaCTTCATTAAAGGGAGAGGATG | 565     |
|       |         |                                                              |         |
| Sbjct | 1388080 | AAAATCTGACTCATTTAAAAAGATTGAATATTAAAAAACTTCATTAAAGGGGGAGGATG  | 1388139 |
| Query | 566     | CAGATAAATTGCAGGCGATTCTTCCAAATACCAAATCGACTACTGA               | 612     |
|       |         |                                                              |         |
| Sbjct | 1388140 | CTGATAAATTACAAGCAGTTCTCCCAAATACAAGAATAGACTATTGA              | 1388186 |

>Leptospira interrogans strain FMAS\_AW3 chromosome 1, complete sequence  
Sequence ID: CP092676.1 Length: 4526110  
Range 1: 1241524 to 1242110

Score:469 bits(519), Expect:2e-130,  
Identities:456/587(78%), Gaps:0/587(0%), Strand: Plus/Plus

|       |         |                                                                |         |
|-------|---------|----------------------------------------------------------------|---------|
| Query | 26      | TCGACTGTAAAAAGAAATGCGGAAGAGATTTTGGGAGAGGCAAAGGCAAACCGGAATTGG   | 85      |
|       |         |                                                                |         |
| Sbjct | 1241524 | TCGATTGTAAAAAAACGCGGTAGAGATTTTAGAAGAAGCAAAGAAAATCGGAATCGA      | 1241583 |
| Query | 86      | TTCAAACCTTTGGATTTTGAATGCAGAAGTTGTCCACGGTTCCGGAAGAAGTTTGC GGTT  | 145     |
|       |         |                                                                |         |
| Sbjct | 1241584 | TTCAAATCTTAGATTTAGGAATGCAAAGTTAACCTCGATTCCAGAAGGAGTTTGCTCTT    | 1241643 |
| Query | 146     | TTCCGAATTTAACCAAGTTGGATCTTCGTTTAAACAGTTTGACTTTTCTTCCGGAATTTA   | 205     |
|       |         |                                                                |         |
| Sbjct | 1241644 | TTCCGAATTTGACTCAGCTGGATTTACGTTTGAACAGTTTGAATTCTCTTCTGTTGGA     | 1241703 |
| Query | 206     | TCGGAGAATGTAAACGCCTTGAACAACCTTAATCTTTTTCGGGAACGACCTTACAACATTTT | 265     |
|       |         |                                                                |         |
| Sbjct | 1241704 | TTGGAGCTTGTAATAATCTGGAACAAATTAACCTTTTTCGGAAATGATCTAAATACGGTTC  | 1241763 |
| Query | 266     | CGTCTACGTTTTCTAAATTAATAAATCTGAAAGTGTTACTGGCGGGAAATAACGATTTTA   | 325     |
|       |         |                                                                |         |
| Sbjct | 1241764 | CATCTTCTTTTTCTAAATTAAGAATTTGAAAGTATTACTCTTGGGTAATAACGATTTTA    | 1241823 |
| Query | 326     | CGATTCTACCCTCCGAACCTTTTGTCTTCCGTTGATCAAAATTCTATACGTAGATCGGA    | 385     |
|       |         |                                                                |         |
| Sbjct | 1241824 | CTTTTCTACCTTCGGAACCTTTTGTCTTGCCTTTGCTTAAACCCTGTATTTGGATCAAA    | 1241883 |
| Query | 386     | ATAAATTAACCTAACGGAAACGGATGTGGAAATTCTCGCTTCTCTTTCTCCTTGGAGG     | 445     |
|       |         |                                                                |         |
| Sbjct | 1241884 | ACAAGCTTACGTTGACTGAAACGGATGTTGAAATTCTAGCTTCTCTTTCCAGTTTGAAG    | 1241943 |
| Query | 446     | AATTGGATCTGAGTCTGAATTCGGGGATTAAGGCGCTCCCTTTTAATTACGAAAACTTG    | 505     |

|       |         |                                                                  |         |
|-------|---------|------------------------------------------------------------------|---------|
| Sbjct | 1241944 | <br>AATTGGATCTTAATTTGAACTCTGGAATCAAAGTGCTTCCTTCTAACTATAATAAATTGA | 1242003 |
| Query | 506     | TAAATCTCATTAATCTAAAAAGATTGAATATTaaaaaaaCTTCATTAAAGGGAGAGGATG     | 565     |
| Sbjct | 1242004 | <br>AAAATCTGACTCATTTAAAAAGATTGAATATTAAAAAAACTTCATTAAAGGGGGAGGATG | 1242063 |
| Query | 566     | CAGATAAATTGCAGGCGATTCTTCCAAATACCAAAATCGACTACTGA                  | 612     |
| Sbjct | 1242064 | <br>CTGATAAATTACAAGCAGTTCTCCCAAATACAAGAATAGACTATTGA              | 1242110 |

>Leptospira interrogans strain FMAS\_KG1 chromosome 1, complete sequence  
Sequence ID: CP092672.1 Length: 4458643  
Range 1: 3022201 to 3022787

Score:469 bits(519), Expect:2e-130,  
Identities:456/587(78%), Gaps:0/587(0%), Strand: Plus/Minus

|       |         |                                                                   |         |
|-------|---------|-------------------------------------------------------------------|---------|
| Query | 26      | TCGACTGTAAAAAGAATGCGGAAGAGATTTTGGGAGAGGCCAAAGGCCAAACCGGAATTGG     | 85      |
| Sbjct | 3022787 | <br>TCGATTGTAAAAAAACGCGGTAGAGATTTTAGAAGAAGCAAAAAGAAAATCGGAATCGA   | 3022728 |
| Query | 86      | TTCAAACCTTTGGATTTTGAATGCAGAAGTTGTCCACGGTTCCGGAAGAAGTTTGCGGTT      | 145     |
| Sbjct | 3022727 | <br>TTCAAATCTTAGATTTAGGAATGCAAAAGTTAACCTCGATTCCAGAAGGAGTTTGCTCTT  | 3022668 |
| Query | 146     | TTCCGAATTTAACCAAGTTGGATCTTCGTTTAAACAGTTTGACTTTTCTTCCGAATTTA       | 205     |
| Sbjct | 3022667 | <br>TTCCGAATTTGACTCAGCTGGATTTACGTTTGAACAGTTTGAATTCTCTTCTGTTGGA    | 3022608 |
| Query | 206     | TCGGAGAATGTAAACGCCTTGAACAACCTTAATCTTTTCGGGAACGACCTTACAACATTTTC    | 265     |
| Sbjct | 3022607 | <br>TTGGAGCTTGTA AAAATCTGGAACAAATTAACCTTTTCGGAAATGATCTAAATACGGTTC | 3022548 |
| Query | 266     | CGTCTACGTTTTCTAAATTA AAAAATCTGAAAGTGTTACTGGCGGGAAATAACGATTTTA     | 325     |
| Sbjct | 3022547 | <br>CATCTTCTTTTTCTAAATTAAGAATTTGAAAGTATTACTCTTGGGTAATAACGATTTTA   | 3022488 |
| Query | 326     | CGATTCTACCCTCCGAACCTTTGTTTCTTCCGTTGATCAAAATTCTATACGTAGATCGGA      | 385     |
| Sbjct | 3022487 | <br>CTTTTCTACCTTCGGAACCTTTGTTTCTGCCTTTGCTTAAACCCTGTATTTGGATCAAA   | 3022428 |
| Query | 386     | ATAAATTAACCTCTAACGGAAACGGATGTGGAAATTCTCGCTTCTCTTTCCTCCTTGAGG      | 445     |
| Sbjct | 3022427 | <br>ACAAGCTTACGTTGACTGAAACGGATGTTGAAATTCTAGCTTCTCTTCCAGTTTGGAAG   | 3022368 |
| Query | 446     | AATTGGATCTGAGTCTGAATTCGGGGATTAAGGCGCTCCCTTTTAATTACGAAAACTTG       | 505     |
| Sbjct | 3022367 | <br>AATTGGATCTTAATTTGAACTCTGGAATCAAAGTGCTTCCTTCTAACTATAATAAATTGA  | 3022308 |
| Query | 506     | TAAATCTCATTAATCTAAAAAGATTGAATATTaaaaaaaCTTCATTAAAGGGAGAGGATG      | 565     |
| Sbjct | 3022307 | <br>AAAATCTGACTCATTTAAAAAGATTGAATATTAAAAAAACTTCATTAAAGGGGGAGGATG  | 3022248 |
| Query | 566     | CAGATAAATTGCAGGCGATTCTTCCAAATACCAAAATCGACTACTGA                   | 612     |
| Sbjct | 3022247 | <br>CTGATAAATTACAAGCAGTTCTCCCAAATACAAGAATAGACTATTGA               | 3022201 |

>Leptospira interrogans strain FMAS\_AP6 chromosome 1, complete sequence  
Sequence ID: CP092156.1 Length: 4525852  
Range 1: 2149342 to 2149928

Score:469 bits(519), Expect:2e-130,  
Identities:456/587(78%), Gaps:0/587(0%), Strand: Plus/Minus

|       |         |                                                               |         |
|-------|---------|---------------------------------------------------------------|---------|
| Query | 26      | TCGACTGTAAAAAGAATGCGGAAGAGATTTTGGGAGAGGCAAAGGCAAAACCGGAATTGG  | 85      |
|       |         |                                                               |         |
| Sbjct | 2149928 | TCGATTGTAAAAAAACGCGGTAGAGATTTTAGAAGAAGCAAAAAGAAAATCGGAATCGA   | 2149869 |
| Query | 86      | TTCAAACCTTTGGATTTTGAATGCAGAAGTTGTCCACGGTTCCGGAAGAAGTTTGCGGTT  | 145     |
|       |         |                                                               |         |
| Sbjct | 2149868 | TTCAAATCTTAGATTTAGGAATGCAAAAGTTAACCTCGATTCCAGAAGGAGTTTGCTCTT  | 2149809 |
| Query | 146     | TTCCGAATTTAACCAAGTTGGATCTTCGTTTAAACAGTTTGACTTTTCTTCCGGAATTTA  | 205     |
|       |         |                                                               |         |
| Sbjct | 2149808 | TTCCGAATTTGACTCAGCTGGATTTACGTTTGAACAGTTTGAATTCTCTTCTGTTGGA    | 2149749 |
| Query | 206     | TCGGAGAATGTAAACGCCTTGAACAACCTTAATCTTTTCGGGAACGACCTTACAACATTTT | 265     |
|       |         |                                                               |         |
| Sbjct | 2149748 | TTGGAGCTTGTA AAAATCTGGAACAAATTAACCTTTTCGGAAATGATCTAAATACGGTTC | 2149689 |
| Query | 266     | CGTCTACGTTTTCTAAATTA AAAAATCTGAAAGTGTTACTGGCGGGAAATAACGATTTTA | 325     |
|       |         |                                                               |         |
| Sbjct | 2149688 | CATCTTCTTTTTCTAAATTAAGAATTTGAAAGTATTACTCTTGGGTAATAACGATTTTA   | 2149629 |
| Query | 326     | CGATTCTACCCTCCGAACCTTTTGTCTTCCGTTGATCAAAATTCTATACGTAGATCGGA   | 385     |
|       |         |                                                               |         |
| Sbjct | 2149628 | CTTTTCTACCTTCGGAACCTTTTGTCTTGCCTTTGCTTAAACCCTGTATTTGGATCAAA   | 2149569 |
| Query | 386     | ATAAATTAACCTTAACGGAAACGGATGTGGAAATTCTCGCTTCTCTTTCTCCTTGGAGG   | 445     |
|       |         |                                                               |         |
| Sbjct | 2149568 | ACAAGCTTACGTTGACTGAAACGGATGTTGAAATTCTAGCTTCTCTTTCCAGTTTGGAAG  | 2149509 |
| Query | 446     | AATTGGATCTGAGTCTGAATTCGGGGATTAAGGCGCTCCCTTTTAATTACGAAAACTTG   | 505     |
|       |         |                                                               |         |
| Sbjct | 2149508 | AATTGGATCTTAATTTGAACCTCTGGAATCAAAGTGCTTCCTTCTAACTATAATAAATTGA | 2149449 |
| Query | 506     | TAAATCTCATTAATCTAAAAAGATTGAATATTaaaaaaaCTTCATTAAAGGGAGAGGATG  | 565     |
|       |         |                                                               |         |
| Sbjct | 2149448 | AAAATCTGACTCATTTAAAAAGATTGAATATTAAAAAACTTCATTAAAGGGGGAGGATG   | 2149389 |
| Query | 566     | CAGATAAATTGCAGGCGATTCTTCCAAATACCAAAATCGACTACTGA               | 612     |
|       |         |                                                               |         |
| Sbjct | 2149388 | CTGATAAATTACAAGCAGTTCTCCCAAATACAAGAATAGACTATTGA               | 2149342 |

>Leptospira interrogans strain FMAS\_AP5 chromosome 1, complete sequence  
Sequence ID: CP092161.1 Length: 4478874  
Range 1: 2832820 to 2833406

Score:469 bits(519), Expect:2e-130,  
Identities:456/587(78%), Gaps:0/587(0%), Strand: Plus/Plus

|       |         |                                                              |         |
|-------|---------|--------------------------------------------------------------|---------|
| Query | 26      | TCGACTGTAAAAAGAATGCGGAAGAGATTTTGGGAGAGGCAAAGGCAAAACCGGAATTGG | 85      |
|       |         |                                                              |         |
| Sbjct | 2832820 | TCGATTGTAAAAAAACGCGGTAGAGATTTTAGAAGAAGCAAAAAGAAAATCGGAATCGA  | 2832879 |
| Query | 86      | TTCAAACCTTTGGATTTTGAATGCAGAAGTTGTCCACGGTTCCGGAAGAAGTTTGCGGTT | 145     |



|       |         |                                                               |         |
|-------|---------|---------------------------------------------------------------|---------|
| Sbjct | 2832880 |                                                               | 2832939 |
|       |         | TTCAAATCTTAGATTTAGGAATGCAAAAGTTAACCTCGATTCCAGAAGGAGTTTGCTCTT  |         |
| Query | 146     | TTCCGAATTTAACCAAGTTGGATCTTCGTTTAAACAGTTTGACTTTTCTTCCGGAATTTA  | 205     |
|       |         |                                                               |         |
| Sbjct | 2832940 | TTCCGAATTTGACTCAGCTGGATTTACGTTTGAACAGTTTGAATTCTCTTCTGTTGGA    | 2832999 |
| Query | 206     | TCGGAGAATGTAAACGCCTTGAACAACCTTAATCTTTTCGGGAACGACCTTACAACATTTT | 265     |
|       |         |                                                               |         |
| Sbjct | 2833000 | TTGGAGCTTGTAAAAATCTGGAACAAATTAACCTTTTCGGAAATGATCTAAATACGGTTC  | 2833059 |
| Query | 266     | CGTCTACGTTTTCTAAATTAATAAATCTGAAAGTGTTACTGGCGGGAAATAACGATTTTA  | 325     |
|       |         |                                                               |         |
| Sbjct | 2833060 | CATCTTCTTTTTCTAAATTAAGAATTTGAAAGTATTACTCTTGGGTAATAACGATTTTA   | 2833119 |
| Query | 326     | CGATTCTACCCTCCGAACCTTTTGTCTTCTCCGTTGATCAAAATTCTATACGTAGATCGGA | 385     |
|       |         |                                                               |         |
| Sbjct | 2833120 | CTTTTCTACCTTCGGAACCTTTTGTCTTCTGCCTTTGCTTAAACCTGTATTTGGATCAAA  | 2833179 |
| Query | 386     | ATAAATTAACCTCTAACGGAAACGGATGTGGAAATTCTCGCTTCTCTTCTCCTTGGAGG   | 445     |
|       |         |                                                               |         |
| Sbjct | 2833180 | ACAAGCTTACGTTGACTGAAACGGATGTTGAAATTCTAGCTTCTCTTCCAGTTTGGAAG   | 2833239 |
| Query | 446     | AATTGGATCTGAGTCTGAATTCGGGGATTAAGGCGCTCCCTTTTAATTACGAAAACTTG   | 505     |
|       |         |                                                               |         |
| Sbjct | 2833240 | AATTGGATCTTAATTTGAACCTCTGGAATCAAAGTGCTTCTTCTAACTATAATAAATTGA  | 2833299 |
| Query | 506     | TAAATCTCATTAAATCTAAAAAGATTGAATATTaaaaaaaCTTCATTAAAGGGAGAGGATG | 565     |
|       |         |                                                               |         |
| Sbjct | 2833300 | AAAATCTGACTCATTTAAAAAGATTGAATATTAAAAAACTTCATTAAAGGGGGAGGATG   | 2833359 |
| Query | 566     | CAGATAAATTGCAGGCGATTCTTCCAAATACCAAATCGACTACTGA                | 612     |
|       |         |                                                               |         |
| Sbjct | 2833360 | CTGATAAATTACAAGCAGTTCTCCCAAATACAAGAATAGACTATTGA               | 2833406 |

>Leptospira interrogans serovar Bataviae strain 1489 chromosome 1, complete sequence  
Sequence ID: CP043893.1 Length: 4431091  
Range 1: 3000720 to 3001306

Score:469 bits(519), Expect:2e-130,  
Identities:456/587(78%), Gaps:0/587(0%), Strand: Plus/Minus

|       |         |                                                               |         |
|-------|---------|---------------------------------------------------------------|---------|
| Query | 26      | TCGACTGTAAAAAGAATGCGGAAGAGATTTGGGAGAGGCCAAAGGCAAAACCGGAATTGG  | 85      |
|       |         |                                                               |         |
| Sbjct | 3001306 | TCGATTGTAAAAAAACGCGGTAGAGATTTAGAGAAGCAAAGAGAAAATCGGAATCGA     | 3001247 |
| Query | 86      | TTCAAACCTTTGGATTTTGAATGCAGAAGTTGTCCACGGTTCCGGAAGAAGTTTGCGGTT  | 145     |
|       |         |                                                               |         |
| Sbjct | 3001246 | TTCAAATCTTAGATTTAGGAATGCAAAAGTTAACCTCGATTCCAGAAGGAGTTTGCTCTT  | 3001187 |
| Query | 146     | TTCCGAATTTAACCAAGTTGGATCTTCGTTTAAACAGTTTGACTTTTCTTCCGGAATTTA  | 205     |
|       |         |                                                               |         |
| Sbjct | 3001186 | TTCCGAATTTGACTCAGCTGGATTTACGTTTGAACAGTTTGAATTCTCTTCTGTTGGA    | 3001127 |
| Query | 206     | TCGGAGAATGTAAACGCCTTGAACAACCTTAATCTTTTCGGGAACGACCTTACAACATTTT | 265     |
|       |         |                                                               |         |
| Sbjct | 3001126 | TTGGAGCTTGTAAAAATCTGGAACAAATTAACCTTTTCGGAAATGATCTAAATACGGTTC  | 3001067 |
| Query | 266     | CGTCTACGTTTTCTAAATTAATAAATCTGAAAGTGTTACTGGCGGGAAATAACGATTTTA  | 325     |
|       |         |                                                               |         |

|       |         |                                                                |         |
|-------|---------|----------------------------------------------------------------|---------|
| Sbjct | 3001066 | CATCTTCTTTTTCTAAATTAAAGAATTTGAAAAGTATTACTCTTGGGTAATAACGATTTTA  | 3001007 |
| Query | 326     | CGATTCTACCCCTCCGAACTTTGTTCCTTCCGTTGATCAAAATTCTATACGTAGATCGGA   | 385     |
|       |         |                                                                |         |
| Sbjct | 3001006 | CTTTTCTACCTTCGGAACTTTGTTCCTGCCTTTGCTTAAACCCCTGTATTTGGATCAAA    | 3000947 |
| Query | 386     | ATAAATTAACCTCTAACCGAAACGGATGTGGAAATTCTCGCTTCTCTTTCCCTCCTTGGAGG | 445     |
|       |         |                                                                |         |
| Sbjct | 3000946 | ACAAGCTTACGTTGACTGAAACGGATGTTGAAATTTTAGCTTCTCTTTCCAGTTTGGAAG   | 3000887 |
| Query | 446     | AATTGGATCTGAGTCTGAATTCGGGGATTAAGGCGCTCCCTTTTAATTACGAAAAACTTG   | 505     |
|       |         |                                                                |         |
| Sbjct | 3000886 | AATTGGATCTTAATTTGAACTCTGGAATCAAAGTGCTTCTCTTAATAATAAATTGA       | 3000827 |
| Query | 506     | TAAATCTCATTAATCTAAAAAGATTGAATATTaaaaaaCTTCATTAAAGGGAGAGGATG    | 565     |
|       |         |                                                                |         |
| Sbjct | 3000826 | AAAATCTGACTCATTTAAAAAGATTGAATATTAAAAAACTTCATTAAAGGGGGAGGATG    | 3000767 |
| Query | 566     | CAGATAAATTGCAGGCGATTCTTCCAAATACCAAAATCGACTACTGA                | 612     |
|       |         |                                                                |         |
| Sbjct | 3000766 | CTGATAAATTACAAGCAGTTCTCCCAAATACAAGAATAGACTATTGA                | 3000720 |

[illegible]

[illegible]

Score:469 bits(519), Expect:2e-130,  
Identities:456/587(78%), Gaps:0/587(0%), Strand: Plus/Minus

>Leptospira interrogans serovar Lai str. IPAV chromosome 1, complete sequence  
Sequence ID: CP001221.1 Length: 4349158  
Range 1: 1315702 to 1316288

Score:469 bits(519), Expect:2e-130,  
Identities:456/587(78%), Gaps:0/587(0%), Strand: Plus/Plus

```
Query 26      TCGACTGTAAAAAGAATGCGGAAGAGATTTTGGGAGAGGCAAAGGCAAAACCGGAATTGG 85
          ||||| ||||| ||||| ||||| ||||| ||||| ||||| ||||| ||||| |||||
Sbjct 1315702 TCGATTGTAAAAAAACGCGGTAGAGATTTTAGAAGAAGCAAAAAGAAAATCGGAATCGA 1315761

Query 86      TTCAAACCTTTGGATTTTGAATGCAGAAGTTGTCCACGGTTCCGGAAGAAGTTTGCGGTT 145
          ||||| ||||| ||||| ||||| ||||| ||||| ||||| ||||| ||||| |||||
Sbjct 1315762 TTCAATCTTAGATTTAGGAATGCAAAGTTAACCTCGATTCCAGAAGGAGTTTGCTCTT 1315821

Query 146     TTCCGAATTTAACCAAGTTGGATCTTCGTTTAAACAGTTTGACTTTTCTTCCGGAATTTA 205
          ||||| ||||| ||||| ||||| ||||| ||||| ||||| ||||| ||||| |||||
Sbjct 1315822 TTCCGAATTTGACTCAGCTGGATTTACGTTTGAACAGTTTGAATTCTCTTCTGTTGGA 1315881

Query 206     TCGGAGAATGTAAACGCCTTGAACAACCTTAATCTTTTCGGGAACGACCTTACAACATTTT 265
          ||||| ||||| ||||| ||||| ||||| ||||| ||||| ||||| ||||| |||||
Sbjct 1315882 TTGGAGCTTGTA AAAATCTGGAACAAATTAACCTTTTCGGAAATGATCTAAATACGGTTC 1315941

Query 266     CGTCTACGTTTTCTAAATTAAAAAATCTGAAAGTGTTACTGGCGGGAAATAACGATTTTA 325
          ||||| ||||| ||||| ||||| ||||| ||||| ||||| ||||| ||||| |||||
Sbjct 1315942 CATCTTCTTTTTCTAAATTAAAGAATTTGAAAGTATTACTCTTGGGTAATAACGATTTTA 1316001

Query 326     CGATTCTACCCTCCGAACCTTTGTTTCTTCCGTTGATCAAAATTCTATACGTAGATCGGA 385
          ||||| ||||| ||||| ||||| ||||| ||||| ||||| ||||| ||||| |||||
Sbjct 1316002 CTTTTCTACCTTCGGAACCTTTGTTTCTGCCTTTGCTTAAACCCTGTATTTGGATCAAA 1316061

Query 386     ATAAATTAACCTCTAACGGAAACGGATGTGGAAATTCTCGCTTCTCTTTCCTCCTGGAGG 445
          ||||| ||||| ||||| ||||| ||||| ||||| ||||| ||||| ||||| |||||
Sbjct 1316062 ACAAGCTTACGTTGACTGAAACGGATGTTGAAATTCTAGCTTCTCTTTCAGTTTGGAAG 1316121

Query 446     AATTGGATCTGAGTCTGAATTCGGGGATTAAGGCGCTCCCTTTTAATTACGAAAACTTG 505
          ||||| ||||| ||||| ||||| ||||| ||||| ||||| ||||| ||||| |||||
Sbjct 1316122 AATTGGATCTTAATTTGAACCTCTGGAATCAAAGTGCTTCCTTCTAACTATAATAAATTGA 1316181

Query 506     TAAATCTCATTAATCTAAAAAGATTGAATATTaaaaaaaCTTCATTAAAGGGAGAGGATG 565
          ||||| ||||| ||||| ||||| ||||| ||||| ||||| ||||| ||||| |||||
Sbjct 1316182 AAAATCTGACTCATTTAAAAAGATTGAATATTAAAAAACTTCATTAAAGGGGGAGGATG 1316241

Query 566     CAGATAAATTGCAGGCGATTCTTCCAAATACCAAAATCGACTACTGA 612
          ||||| ||||| ||||| ||||| ||||| ||||| ||||| ||||| ||||| |||||
Sbjct 1316242 CTGATAAATTACAAGCAGTTCTCCCAAATACAAGAATAGACTATTGA 1316288
```

>Leptospira interrogans serovar Lai str. 56601 chromosome I, complete sequence  
Sequence ID: AE010300.2 Length: 4338762  
Range 1: 1316631 to 1317217

Score:469 bits(519), Expect:2e-130,  
Identities:456/587(78%), Gaps:0/587(0%), Strand: Plus/Plus

```
Query 26      TCGACTGTAAAAAGAATGCGGAAGAGATTTTGGGAGAGGCAAAGGCAAAACCGGAATTGG 85
          ||||| ||||| ||||| ||||| ||||| ||||| ||||| ||||| ||||| |||||
Sbjct 1316631 TCGATTGTAAAAAAACGCGGTAGAGATTTTAGAAGAAGCAAAAAGAAAATCGGAATCGA 1316690

Query 86      TTCAAACCTTTGGATTTTGAATGCAGAAGTTGTCCACGGTTCCGGAAGAAGTTTGCGGTT 145
```

|       |         |                                                               |         |
|-------|---------|---------------------------------------------------------------|---------|
| Sbjct | 1316691 |                                                               | 1316750 |
|       |         | TTCAAATCTTAGATTTAGGAATGCAAAAGTTAACCTCGATTCCAGAAGGAGTTTGCTCTT  |         |
| Query | 146     | TTCCGAATTTAACCAAGTTGGATCTTCGTTTAAACAGTTTGACTTTTCTTCCGGAATTTA  | 205     |
|       |         |                                                               |         |
| Sbjct | 1316751 | TTCCGAATTTGACTCAGCTGGATTTACGTTTGAACAGTTTGAATTCTCTTCTGTTGGA    | 1316810 |
| Query | 206     | TCGGAGAATGTAAACGCCTTGAACAACCTAATCTTTTCGGGAACGACCTTACAACATTTT  | 265     |
|       |         |                                                               |         |
| Sbjct | 1316811 | TTGGAGCTTGTA AAAATCTGGAACAAATTAACCTTTTCGGAAATGATCTAAATACGGTTC | 1316870 |
| Query | 266     | CGTCTACGTTTTCTAAATTA AAAAATCTGAAAGTGTTACTGGCGGGAAATAACGATTTTA | 325     |
|       |         |                                                               |         |
| Sbjct | 1316871 | CATCTTCTTTTTCTAAATTAAGAATTTGAAAGTATTACTCTTGGGTAATAACGATTTTA   | 1316930 |
| Query | 326     | CGATTCTACCCTCCGAACCTTTTGTTCCTTCGTTGATCAAAATTCTATACGTAGATCGGA  | 385     |
|       |         |                                                               |         |
| Sbjct | 1316931 | CTTTTCTACCTTCGGAACCTTTTGTTCCTGCCTTTGCTTAAACCTGTATTTGGATCAAA   | 1316990 |
| Query | 386     | ATAAATTAACCTCTAACGGAAACGGATGTGGAAATTCTCGCTTCTCTTTCTCCTTGGAGG  | 445     |
|       |         |                                                               |         |
| Sbjct | 1316991 | ACAAGCTTACGTTGACTGAAACGGATGTTGAAATTCTAGCTTCTCTTTCCAGTTTGGAAG  | 1317050 |
| Query | 446     | AATTGGATCTGAGTCTGAATTCGGGGATTAAGGCGCTCCCTTTTAATTACGAAAACTTG   | 505     |
|       |         |                                                               |         |
| Sbjct | 1317051 | AATTGGATCTTAATTTGAACCTCTGGAATCAAAGTGCTTCCTTCTAACTATAATAATTGA  | 1317110 |
| Query | 506     | TAAATCTCATTAAATCTAAAAAGATTGAATATTaaaaaaCTTCATTAAAGGGAGAGGATG  | 565     |
|       |         |                                                               |         |
| Sbjct | 1317111 | AAAATCTGACTCATTTAAAAAGATTGAATATTAAAAAACTTCATTAAAGGGGGAGGATG   | 1317170 |
| Query | 566     | CAGATAAATTGCAGGCGATTCTTCCAAATACCAAATCGACTACTGA                | 612     |
|       |         |                                                               |         |
| Sbjct | 1317171 | CTGATAAATTACAAGCAGTTCTCCCAAATACAAGAATAGACTATTGA               | 1317217 |

>Leptospira interrogans serovar Copenhageni str. Fiocruz L1-130, chromosome I, complete sequence  
Sequence ID: AE016823.1 Length: 4277185  
Range 1: 2909058 to 2909644

Score:469 bits(519), Expect:2e-130,  
Identities:456/587(78%), Gaps:0/587(0%), Strand: Plus/Minus

|       |         |                                                               |         |
|-------|---------|---------------------------------------------------------------|---------|
| Query | 26      | TCGACTGTAAAAAGAATGCGGAAGAGATTTTGGGAGAGGCCAAAGGCAAACCGGAATTGG  | 85      |
|       |         |                                                               |         |
| Sbjct | 2909644 | TCGATTGTAAAAAAACGCGGTAGAGATTTTAGAAGAAGCAAAAAGAAAATCGGAATCGA   | 2909585 |
| Query | 86      | TTCAAACCTTTGGATTTTGAATGCAGAAGTTGTCCACGGTTCCGGAAGAAGTTTGCGGTT  | 145     |
|       |         |                                                               |         |
| Sbjct | 2909584 | TTCAAATCTTAGATTTAGGAATGCAAAAGTTAACCTCGATTCCAGAAGGAGTTTGCTCTT  | 2909525 |
| Query | 146     | TTCCGAATTTAACCAAGTTGGATCTTCGTTTAAACAGTTTGACTTTTCTTCCGGAATTTA  | 205     |
|       |         |                                                               |         |
| Sbjct | 2909524 | TTCCGAATTTGACTCAGCTGGATTTACGTTTGAACAGTTTGAATTCTCTTCTGTTGGA    | 2909465 |
| Query | 206     | TCGGAGAATGTAAACGCCTTGAACAACCTAATCTTTTCGGGAACGACCTTACAACATTTT  | 265     |
|       |         |                                                               |         |
| Sbjct | 2909464 | TTGGAGCTTGTA AAAATCTGGAACAAATTAACCTTTTCGGAAATGATCTAAATACGGTTC | 2909405 |
| Query | 266     | CGTCTACGTTTTCTAAATTA AAAAATCTGAAAGTGTTACTGGCGGGAAATAACGATTTTA | 325     |

|       |         |                                                                |         |
|-------|---------|----------------------------------------------------------------|---------|
| Sbjct | 2909404 | CATCTTCTTTTTCTAAATTAAAGAATTTGAAAGTATTACTCTTGGGTAAATAACGATTTTA  | 2909345 |
| Query | 326     | CGATTCTACCCCTCCGAACTTTGTCTTCTCCGTTGATCAAAATTCTATACGTAGATCGGA   | 385     |
| Sbjct | 2909344 | CTTTTCTACCTTCGGAACTTTGTCTGCCTTTGCTTAAACCCCTGTATTTGGATCAAA      | 2909285 |
| Query | 386     | ATAAATTAACCTCTAACGGAAACGGATGTGGAAATTCTCGCTTCTCTTTCCCTCCTTGGAGG | 445     |
| Sbjct | 2909284 | ACAAGCTTACGTTGACTGAAACGGATGTTGAAATTCTAGCTTCTCTTTCCAGTTTGGAAG   | 2909225 |
| Query | 446     | AATTGGATCTGAGTCTGAATTCGGGGATTAAAGGCGCTCCCTTTTAATTACGAAAAACTTG  | 505     |
| Sbjct | 2909224 | AATTGGATCTTAATTTGAACTCTGGAATCAAAGTGCTTCTTCTAACTATAATAAATTGA    | 2909165 |
| Query | 506     | TAAATCTCATTAATCTAAAAAGATTGAATATTaaaaaaaCTTCATTAAAGGGAGAGGATG   | 565     |
| Sbjct | 2909164 | AAAATCTGACTCATTTAAAAAGATTGAATATTAAAAAACTTCATTAAAGGGGGAGGATG    | 2909105 |
| Query | 566     | CAGATAAAATTGCAGGCGATTCTTCCAAATACCAAAATCGACTACTGA               | 612     |
| Sbjct | 2909104 | CTGATAAAATTACAAGCAGTTCTCCCAAATACAAGAATAGACTATTGA               | 2909058 |

|       |         |                                                                  |         |
|-------|---------|------------------------------------------------------------------|---------|
| Query | 26      | TCGACTGTAAAAAGAATGCGGAAGAGATTTTGGGAGAGGCAAAAGGCCAAAACCGGAATTGG   | 85      |
|       |         |                                                                  |         |
| Sbjct | 2867691 | TCGATTGTAAAAA-AACGCGGTAGAGATTTTAGAAGAAGCAAAAAGAAAATCGGAATCGA     | 2867633 |
| Query | 86      | TTCAAAC TTTGGATTTT GGAATGCAGAAGTTGTCCACGGTTC CGGAAGAAGTTTGC GGTT | 145     |
|       |         |                                                                  |         |
| Sbjct | 2867632 | TTCAAATCTTAGATTTAGGAATGCAAAAGTTAACCCTCGATTCCAGAAGGAGTTTGCCTCTT   | 2867573 |
| Query | 146     | TTCCGAATTTAACC AAGTTGGATCTTCGTTTAAACAGTTTGACTTTTCTTCCGAATTTA     | 205     |
|       |         |                                                                  |         |
| Sbjct | 2867572 | TTCCGAATTTGACTCAGCTGGATTTACGTTTGAACAGTTTGAATTCTCTTCTCTGGTTGGA    | 2867513 |
| Query | 206     | TCGGAGAATGTAAACGCCTTGAACAAC TTAATCTTTTCGGGAACGACCTTACAACATTTTC   | 265     |
|       |         |                                                                  |         |
| Sbjct | 2867512 | TTGGAGCTTGTA AAAATCTGGAACAAATTAACCTTTTCGGAAATGATCTAAATACGGTTTC   | 2867453 |
| Query | 266     | CGTCTACGTTTTCTAAATTAAAAAATCTGAAAGTGTTACTGGCGGGAAATAACGATTTTA     | 325     |
|       |         |                                                                  |         |
| Sbjct | 2867452 | CATCTTCTTTTTCTAAATTAAAGAATTTGAAAGTATTACTCTTGGGTAAATAACGATTTTA    | 2867393 |
| Query | 326     | CGATTCTACCCCTCCGAAC TTTTGT TTTCTTCCGTTGATCAAAAATCTATACGTAGATCGGA | 385     |
|       |         |                                                                  |         |
| Sbjct | 2867392 | CTTTTCTACCTTCGGAACTTTTGT TTTCTGCCTTTGCTTAA AACCTGTATTTGGATCAAA   | 2867333 |
| Query | 386     | ATAAATTAAC TCTAACGGAACGGATGTGGAAAT TCTCGCTTCTCTTTCTCTCTTGGAGG    | 445     |
|       |         |                                                                  |         |
| Sbjct | 2867332 | ACAAGCTTACGTTGACTGAAACGGATGTTGAAAT TCTAGCTTCTCTTTCCAGTTTGAAG     | 2867273 |
| Query | 446     | AATTGGATCTGAGTCTGAATTCGGGGATTAAAGGCGCTCCCTTTTAAATTACGAAAAA CTTG  | 505     |

|       |         |  |                                                               |                                               |         |
|-------|---------|--|---------------------------------------------------------------|-----------------------------------------------|---------|
| Sbjct | 2867272 |  | AATTGGATCTTAATTTGA                                            | ACTCTGGAATCAAAGTGCTTCCTTCTAACTATAATAAATTGA    | 2867213 |
| Query | 506     |  | TAAATCTCATTAAATCTAAAAAGATTGAATATTaaaaaaaCTTCATTAAAGGGAGAGGATG | 565                                           |         |
| Sbjct | 2867212 |  | AAAATCTGACTCATT                                               | TAAAAAGATTGAATATTAAAAAAACTTCATTAAAGGGGGAGGATG | 2867153 |
| Query | 566     |  | CAGATAAATTGCAGGCGATTCTTCCAAATACCAAAATCGACTACTGA               | 612                                           |         |
| Sbjct | 2867152 |  | CTGATAAATTACAAGCAGTTCTCCCAAATACAAGAATAGACTATTGA               | 2867106                                       |         |

>Leptospira interrogans serovar Canicola leucine-rich repeat protein gene, partial cds  
Sequence ID: JX426070.1 Length: 410  
Range 1: 3 to 407

Score:325 bits(360), Expect:1e-87,  
Identities:315/405(78%), Gaps:0/405(0%), Strand: Plus/Plus

|       |     |                                                                |                                 |     |
|-------|-----|----------------------------------------------------------------|---------------------------------|-----|
| Query | 192 | TCTTCCGGAATTTATCGGAGAATGTAAACGCCTTGAACAACTTAATCTTTTCGGGAACGA   | 251                             |     |
| Sbjct | 3   | TCTTCCTGGTTGGATTGGAGCTTGTA AAAATCTGGAACAAATTAACCTTTTCGGAAATGA  | 62                              |     |
| Query | 252 | CCTTACAACATTTCCGTCTACGTTTTCTAAATTAAAAAATCTGAAAGTGTTACTGGCGGG   | 311                             |     |
| Sbjct | 63  | TCTAAATACGGTTCATCTTCTTTTCTAAATTAAAGAATTTGAAAGTATTGCTCTTGGG     | 122                             |     |
| Query | 312 | AAATAACGATTTTACGATTCTACCCTCCGAACCTTTTGTTTCTTCCGTTGATCAAAATTCT  | 371                             |     |
| Sbjct | 123 | TAATAACGATTTTACTTTTCTACCTTCGGAACCTTTTGTTTCTGCCTTTGATTAAACCCT   | 182                             |     |
| Query | 372 | ATACGTAGATCGGAATAAATTAACCTCTAACGGAAACGGATGTGGAAATTCTCGCTTCTCT  | 431                             |     |
| Sbjct | 183 | GTA CT TGGATCAAAACAAGCTTACGTTGACCGAAACGGATGTTGAAATTCTAGCTTCTCT | 242                             |     |
| Query | 432 | TTCCTCCTTGGAGGAATTGGATCTGAGTCTGAATTCGGGGATTAAGGCGCTCCCTTTTAA   | 491                             |     |
| Sbjct | 243 | TTCCAGTTTGAAGAATTGGATCTTAATTTGAACCTCTGGAATTAAGTGCTTCCTTCTAA    | 302                             |     |
| Query | 492 | TTACGAAAACTTGTAATCTCATTAAATCTAAAAAGATTGAATATTaaaaaaaCTTCATT    | 551                             |     |
| Sbjct | 303 | CTATAATAAATTGAAAAATCTGACTCATT                                  | TAAAAAGATTGAATATTAAAAAAACTTCATT | 362 |
| Query | 552 | AAAGGGAGAGGATGCAGATAAATTGCAGGCGATTCTTCCAAATAC                  | 596                             |     |
| Sbjct | 363 | AAAGGGAGAAGATGCTGATAAATTACAAGCAGTTCTCCCAAATAC                  | 407                             |     |

>Leptospira interrogans serovar Autumnalis leucine-rich repeat protein gene, partial cds  
Sequence ID: JX426069.1 Length: 411  
Range 1: 3 to 407

Score:321 bits(355), Expect:5e-86,  
Identities:314/405(78%), Gaps:0/405(0%), Strand: Plus/Plus

|       |     |                                                               |     |
|-------|-----|---------------------------------------------------------------|-----|
| Query | 192 | TCTTCCGGAATTTATCGGAGAATGTAAACGCCTTGAACAACTTAATCTTTTCGGGAACGA  | 251 |
| Sbjct | 3   | TCTTCCTGGTTGGATTGGAGCTTGTA AAAATCTGGAACAAATTAACCTTTTCGGAAATGA | 62  |

|       |     |                                                               |     |
|-------|-----|---------------------------------------------------------------|-----|
| Query | 252 | CCTTACAACATTTCCGTCTACGTTTTCTAAATTAAAAAATCTGAAAGTGTTACTGGCGGG  | 311 |
|       |     |                                                               |     |
| Sbjct | 63  | TCTAAATACGTTCCATCTTCTTTTTCTAAATTAAAGAATTTGAAAGTATTGCTCTTGGG   | 122 |
| Query | 312 | AAATAACGATTTTACGATTCTACCCTCCGAACCTTTTGTTCCTCCGTTGATCAAAATTCT  | 371 |
|       |     |                                                               |     |
| Sbjct | 123 | TAATAACGATTTTACTTTTCTACCTTCGGAACCTTTTGTTCCTGCCTTTGATTAAACCT   | 182 |
| Query | 372 | ATACGTAGATCGGAATAAATTAACCTCTAACGGAAACGGATGTGGAAATTCTCGCTTCTCT | 431 |
|       |     |                                                               |     |
| Sbjct | 183 | GTAATTGGATCAAAACAAGCTTACGTTGACCGAAACGGATGTTGAAATTCTAGCTTCTCT  | 242 |
| Query | 432 | TTCCTCCTTGAGGAATTGGATCTGAGTCTGAATTCGGGGATTAAGGCGCTCCCTTTTAA   | 491 |
|       |     |                                                               |     |
| Sbjct | 243 | TTCCAGTTTGGAAGAATTGGATCTTAATTTGAACTCTGGAATTAAAGTGCTTCCTTCTAA  | 302 |
| Query | 492 | TTACGAAAACTTGTAATCTCATTAACTCTAAAAAGATTGAATATTaaaaaaaCTTCATT   | 551 |
|       |     |                                                               |     |
| Sbjct | 303 | CTATAATAAATTGAAAAATCTGACTCATTTAAAAAGATTGAATATTAAAAAACTTCATT   | 362 |
| Query | 552 | AAAGGGAGAGGATGCAGATAAATTGCAGGCGATTCTTCCAAATAC                 | 596 |
|       |     |                                                               |     |
| Sbjct | 363 | AAAGGGGGAAGATGCTGATAAATTACAAGCAGTTCTCCCAAATAC                 | 407 |

>Leptospira interrogans serovar Hebdomadis leucine-rich repeat protein gene, partial cds  
Sequence ID: JX426072.1 Length: 303  
Range 1: 12 to 299

Score:259 bits(286), Expect:1e-67,  
Identities:230/288(80%), Gaps:0/288(0%), Strand: Plus/Plus

|       |     |                                                               |     |
|-------|-----|---------------------------------------------------------------|-----|
| Query | 309 | GGGAAATAACGATTTTACGATTCTACCCTCCGAACCTTTTGTTCCTTCGTTGATCAAAAT  | 368 |
|       |     |                                                               |     |
| Sbjct | 12  | GGGTAATAACGATTTTACTTTTCTACCTTCGGAACCTTTTGTTCCTGCCTTTGATTAAAC  | 71  |
| Query | 369 | TCTATACGTAGATCGGAATAAATTAACCTCTAACGGAAACGGATGTGGAAATTCTCGCTTC | 428 |
|       |     |                                                               |     |
| Sbjct | 72  | CCTGTACTTGATCAAAACAAGCTTACGTTGACCGAAACGGATGTTGAAATTCTAGCTTC   | 131 |
| Query | 429 | TCTTTCCTCCTTGAGGAATTGGATCTGAGTCTGAATTCGGGGATTAAGGCGCTCCCTTT   | 488 |
|       |     |                                                               |     |
| Sbjct | 132 | TCTTTCAGTTTGGAAGAATTGGATCTTAATTTGAACTCTGGAATTAAAGTGCTTCCTTC   | 191 |
| Query | 489 | TAATTACGAAAACTTGTAATCTCATTAACTCTAAAAAGATTGAATATTaaaaaaaCTTC   | 548 |
|       |     |                                                               |     |
| Sbjct | 192 | TAACTATAATAAATTGAAAAATCTGACTCATTTAAAAAGATTGAATATTAAAAAACTTC   | 251 |
| Query | 549 | ATTAAAGGGAGAGGATGCAGATAAATTGCAGGCGATTCTTCCAAATAC              | 596 |
|       |     |                                                               |     |
| Sbjct | 252 | ATTAAAGGGAGAAGATGCTGATAAATTACAAGCAGTTCTCCCAAATAC              | 299 |

>Leptospira interrogans serovar Pyrogenes leucine-rich repeat protein gene, partial cds  
Sequence ID: JX426071.1 Length: 312  
Range 1: 3 to 305

Score:214 bits(236), Expect:5e-54,  
Identities:229/303(76%), Gaps:0/303(0%), Strand: Plus/Plus



|       |     |                                                               |     |
|-------|-----|---------------------------------------------------------------|-----|
| Query | 192 | TCTTCCGGAATTTATCGGAGAATGTAAACGCCCTGAACAACCTTAATCTTTTCGGGAACGA | 251 |
|       |     |                                                               |     |
| Sbjct | 3   | TCTTCCTGGTTGGATTGGAGCTTGTA AAAATCTGGAACAAATTAACCTTTTCGGAAATGA | 62  |
| Query | 252 | CCTTACAACATTTCCGTCTACGTTTTCTAAATTAAAAAATCTGAAAGTGTTACTGGCGGG  | 311 |
|       |     |                                                               |     |
| Sbjct | 63  | TCTAAATACGTTCCATCTTCTTTTTCTAAATTAAAGAATTTGAAAGTATTACTCTTGGG   | 122 |
| Query | 312 | AAATAACGATTTTACGATTCTACCTCCGAACTTTTGTTTCTTCCGTTGATCAAAATTCT   | 371 |
|       |     |                                                               |     |
| Sbjct | 123 | TAATAACGATTTTACTTTTCTACCTTCGGAACCTTTTGTTTCTGCCTTTGCTTAAACCT   | 182 |
| Query | 372 | ATACGTAGATCGGAATAAATTAACCTAACGGAAACGGATGTGGAAATTCTCGCTTCTCT   | 431 |
|       |     |                                                               |     |
| Sbjct | 183 | GTATTTGGATCAAAACAAGCTTACGTTGACTGAAACGGATGTTGAAATTCTAGCTTCTCT  | 242 |
| Query | 432 | TTCTCTCTTGAGGAATTGGATCTGAGTCTGAATTCGGGGATTAAGGCGCTCCCTTTTAA   | 491 |
|       |     |                                                               |     |
| Sbjct | 243 | TTCCAGTTTGGAAGAATTGGATCTTAATTTGAACTCTGGAATCAAAGTGCTTCCTTCTAA  | 302 |
| Query | 492 | TTA                                                           | 494 |
|       |     |                                                               |     |
| Sbjct | 303 | CTA                                                           | 305 |
