# Supplementary material for: Leptospira borgpetersenii Leucine-Rich Repeat Proteins Provide Strong Protective Efficacy as Novel Leptospiral Vaccine Candidates
Source: MDPI journal article supplement (doi:10.3390/tropicalmed8010006), 2022-12-22
Supplement: s1 [file s1]

**Supplementary data S1.** The alignment between “*KU\_Sej\_R21\_2012* (NCBI accession: JN627495)” gene and *L. interrogans* serovar Pomona (taxid:44276), and only two genomes from *L. interrogans* serovar Bataviae strain 1489 (orange color) and serovar Canicola strain 782 (green color) showed 74.53% identity with the *KU\_Sej\_R21\_2012* gene.

Your search is limited to records that include: *Leptospira interrogans* (taxid:173), *Leptospira interrogans* serovar Pomona (taxid:44276), *Leptospira interrogans* serovar Pomona str. UT364 (taxid:1049925), *Leptospira interrogans* serovar Pomona str. Kennewicki LC82-25 (taxid:1049924), *Leptospira interrogans* serovar Pomona str. CSL4002 (taxid:1240691), *Leptospira interrogans* serovar Pomona str. Pomona (taxid:1001587), *Leptospira interrogans* serovar Pomona str. Fox 32256 (taxid:1218574), *Leptospira interrogans* serovar Pomona str. CSL10083 (taxid:1240692), *Leptospira kirschneri* serovar Pomona (taxid:561005), *Leptospira borgpetersenii* serovar Pomona (taxid:1192865), *Leptospira borgpetersenii* serovar Pomona str. 200901868 (taxid:1192866)

RID: DTK9YZ64013  
 Job Title:JN627495:Leptospira borgpetersenii serovar...  
 Program: BLASTN  
 Query: Leptospira borgpetersenii serovar Sejroe clone R21-2012 truncated leucine-rich repeat protein (LRR) gene, partial cds ID: JN627495.1(nucleic acid) Length: 643  
 Database: nt Nucleotide collection (nt)

Sequences producing significant alignments:

|                                                                   |       |       |       |                          | Scientific      | Common | Max    |       |
|-------------------------------------------------------------------|-------|-------|-------|--------------------------|-----------------|--------|--------|-------|
| Total Query                                                       | E     | Per.  | Acc.  |                          | Name            | Name   | Taxid  | Score |
| Description                                                       | Score | cover | Value | Ident Len Accession      |                 |        |        |       |
| Leptospira borgpetersenii serovar Sejroe clone R21-2012...        | 1118  | 100%  | 0.0   | 100.00 643 JN627495.1    | Leptospira b... | NA     | 338220 | 1118  |
| Leptospira borgpetersenii serovar Ceylonica strain Piyasena...    | 1083  | 100%  | 0.0   | 98.60 3670231 CP026671.1 | Leptospira b... | NA     | 508536 | 1083  |
| Leptospira borgpetersenii strain FMAS_AP2 chromosome 1, comple... | 1083  | 100%  | 0.0   | 98.60 3595436 CP072630.1 | Leptospira b... | NA     | 174    | 1083  |
| Leptospira borgpetersenii strain FMAS_AP3 chromosome 1, comple... | 1083  | 100%  | 0.0   | 98.60 3595898 CP072628.1 | Leptospira b... | NA     | 174    | 1083  |
| Leptospira borgpetersenii strain FMAS_AP4 chromosome 1, comple... | 1083  | 100%  | 0.0   | 98.60 3595848 CP072626.1 | Leptospira b... | NA     | 174    | 1083  |
| Leptospira borgpetersenii strain FMAS_PN1 chromosome 1, comple... | 1083  | 100%  | 0.0   | 98.60 3596207 CP072624.1 | Leptospira b... | NA     | 174    | 1083  |
| Leptospira borgpetersenii strain FMAS_PN4 chromosome 1, comple... | 1083  | 100%  | 0.0   | 98.60 3595796 CP072622.1 | Leptospira b... | NA     | 174    | 1083  |
| Leptospira borgpetersenii strain FMAS_AP8 chromosome 1, comple... | 1083  | 100%  | 0.0   | 98.60 3595870 CP072620.1 | Leptospira b... | NA     | 174    | 1083  |
| Leptospira borgpetersenii strain FMAS_AP9 chromosome 1, comple... | 1083  | 100%  | 0.0   | 98.60 3595582 CP072618.1 | Leptospira b... | NA     | 174    | 1083  |
| Leptospira borgpetersenii strain R14-L chromosome 1               | 1028  | 100%  | 0.0   | 96.42 3581013 CP047516.1 | Leptospira b... | NA     | 174    | 1028  |

|                                                                   |                 |    |         |      |     |
|-------------------------------------------------------------------|-----------------|----|---------|------|-----|
| Leptospira borgpetersenii strain R6L chromosome 1                 | Leptospira b... | NA | 174     | 1028 |     |
| 1028 100% 0.0 96.42 3580531 CP047520.1                            |                 |    |         |      |     |
| Leptospira borgpetersenii strain R14 chromosome 1                 | Leptospira b... | NA | 174     | 1028 |     |
| 1028 100% 0.0 96.42 3601002 CP047504.1                            |                 |    |         |      |     |
| Leptospira borgpetersenii strain R6 chromosome 1                  | Leptospira b... | NA | 174     | 1028 |     |
| 1028 100% 0.0 96.42 3513910 CP047372.1                            |                 |    |         |      |     |
| Leptospira borgpetersenii strain Mo4 chromosome 1                 | Leptospira b... | NA | 174     | 1028 |     |
| 1028 100% 0.0 96.42 3581767 CP047334.1                            |                 |    |         |      |     |
| Leptospira borgpetersenii strain R28 chromosome 1                 | Leptospira b... | NA | 174     | 1028 |     |
| 1028 100% 0.0 96.42 3580481 CP047332.1                            |                 |    |         |      |     |
| Leptospira borgpetersenii strain R23 chromosome 1                 | Leptospira b... | NA | 174     | 1028 |     |
| 1028 100% 0.0 96.42 3579904 CP047370.1                            |                 |    |         |      |     |
| Leptospira borgpetersenii strain R29 chromosome 1                 | Leptospira b... | NA | 174     | 1028 |     |
| 1028 100% 0.0 96.42 3580756 CP047330.1                            |                 |    |         |      |     |
| Leptospira borgpetersenii str. 4E chromosome 1                    | Leptospira b... | NA | 1141102 | 1028 |     |
| 1028 100% 0.0 96.42 3550837 CP015814.2                            |                 |    |         |      |     |
| Leptospira borgpetersenii serovar Ballum strain 56604 chromoso... | Leptospira b... | NA | 280505  | 1028 |     |
| 1028 100% 0.0 96.42 3550837 CP012029.1                            |                 |    |         |      |     |
| Leptospira borgpetersenii strain 34-PK chromosome 1, complete...  | Leptospira b... | NA | 174     | 1017 |     |
| 1017 100% 0.0 95.96 3603305 CP097464.1                            |                 |    |         |      |     |
| Leptospira borgpetersenii serovar Hardjo-bovis strain L49...      | Leptospira b... | NA | 338217  | 892  | 977 |
| 100% 0.0 91.60 3620710 CP033440.1                                 |                 |    |         |      |     |
| Leptospira borgpetersenii serovar Hardjo-bovis strain 203...      | Leptospira b... | NA | 338217  | 892  | 977 |
| 100% 0.0 91.60 3589981 CP021412.1                                 |                 |    |         |      |     |
| Leptospira borgpetersenii serovar Hardjo strain NVSL S 818...     | Leptospira b... | NA | 328971  | 892  | 977 |
| 100% 0.0 91.60 3584464 CP015052.1                                 |                 |    |         |      |     |
| Leptospira borgpetersenii serovar Hardjo strain NVSL S 1343...    | Leptospira b... | NA | 328971  | 892  | 977 |
| 100% 0.0 91.60 3613654 CP015050.1                                 |                 |    |         |      |     |
| Leptospira borgpetersenii serovar Hardjo strain BK-30 chromoso... | Leptospira b... | NA | 328971  | 892  | 977 |
| 100% 0.0 91.60 3629289 CP015048.1                                 |                 |    |         |      |     |
| Leptospira borgpetersenii serovar Hardjo strain BK-9 chromosome 1 | Leptospira b... | NA | 328971  | 892  | 977 |
| 100% 0.0 91.60 3631634 CP015046.1                                 |                 |    |         |      |     |
| Leptospira borgpetersenii serovar Hardjo strain BK-6 chromosome 1 | Leptospira b... | NA | 328971  | 892  | 977 |
| 100% 0.0 91.60 3649879 CP015044.1                                 |                 |    |         |      |     |
| Leptospira borgpetersenii strain KR39 chromosome 1, complete...   | Leptospira b... | NA | 174     | 892  | 977 |
| 100% 0.0 91.60 3603773 CP096127.1                                 |                 |    |         |      |     |
| Leptospira borgpetersenii serovar Hardjo strain TC129 chromoso... | Leptospira b... | NA | 328971  | 892  | 977 |
| 100% 0.0 91.60 3585597 CP084038.1                                 |                 |    |         |      |     |
| Leptospira borgpetersenii strain TC147 chromosome I, complete...  | Leptospira b... | NA | 174     | 892  | 977 |
| 100% 0.0 91.60 3585599 CP084040.1                                 |                 |    |         |      |     |
| Leptospira borgpetersenii strain TC273 chromosome I, complete...  | Leptospira b... | NA | 174     | 892  | 977 |
| 100% 0.0 91.60 3585577 CP084042.1                                 |                 |    |         |      |     |
| Leptospira borgpetersenii strain TC112 chromosome I, complete...  | Leptospira b... | NA | 174     | 892  | 977 |
| 100% 0.0 91.60 3585599 CP084036.1                                 |                 |    |         |      |     |
| Leptospira borgpetersenii serovar Hardjo-bovis JB197 chromosom... | Leptospira b... | NA | 355277  | 892  | 977 |
| 100% 0.0 91.60 3576473 CP000350.1                                 |                 |    |         |      |     |

|                                                                       |                 |    |         |     |     |
|-----------------------------------------------------------------------|-----------------|----|---------|-----|-----|
| Leptospira borgpetersenii serovar Hardjo-bovis L550 chromosome...     | Leptospira b... | NA | 355276  | 892 | 977 |
| 100% 0.0 91.60 3614446 CP000348.1                                     |                 |    |         |     |     |
| Leptospira mayottensis strain MDI272 chromosome I, complete...        | Leptospira m... | NA | 1137606 | 757 | 757 |
| 100% 0.0 87.42 3861885 CP030147.1                                     |                 |    |         |     |     |
| Leptospira mayottensis 200901116 chromosome I, complete sequence      | Leptospira m... | NA | 1192864 | 757 | 757 |
| 100% 0.0 87.42 3815263 CP024871.1                                     |                 |    |         |     |     |
| Leptospira weilii strain CUD13 chromosome I, complete sequence        | Leptospira w... | NA | 28184   | 679 |     |
| 1121 100% 0.0 83.18 3978120 CP040843.1                                |                 |    |         |     |     |
| Leptospira weilii strain CUDO6 chromosome I, complete sequence        | Leptospira w... | NA | 28184   | 679 |     |
| 1121 100% 0.0 83.18 3965053 CP040840.1                                |                 |    |         |     |     |
| Leptospira weilii strain FMAS_PD2 chromosome 1, complete sequence     | Leptospira w... | NA | 28184   | 679 |     |
| 1121 100% 0.0 83.18 4222777 CP092203.1                                |                 |    |         |     |     |
| Leptospira mayottensis strain MDI222 chromosome I                     | Leptospira m... | NA | 1137606 | 606 | 606 |
| 100% 1e-168 82.58 3934431 CP030144.1                                  |                 |    |         |     |     |
| Leptospira mayottensis strain VS2413 chromosome I, complete...        | Leptospira m... | NA | 1137606 | 602 | 602 |
| 100% 2e-167 82.43 3803942 CP030142.1                                  |                 |    |         |     |     |
| Leptospira borgpetersenii serovar Sejroe clone R21-N2012...           | Leptospira b... | NA | 338220  | 601 | 601 |
| 53% 6e-167 100.00 350 JN627491.1                                      |                 |    |         |     |     |
| Leptospira borgpetersenii serovar Ballum clone R3-N2012...            | Leptospira b... | NA | 280505  | 585 | 585 |
| 53% 3e-162 98.84 350 JN627493.1                                       |                 |    |         |     |     |
| Leptospira borgpetersenii serovar Javanica clone R12-N2012...         | Leptospira b... | NA | 280504  | 561 | 561 |
| 53% 3e-155 97.10 350 JN627494.1                                       |                 |    |         |     |     |
| Leptospira borgpetersenii serovar Sejroe clone R21-C2012...           | Leptospira b... | NA | 338220  | 517 | 517 |
| 46% 7e-142 100.00 297 JN627492.1                                      |                 |    |         |     |     |
| Leptospira interrogans serovar Bataviae strain 1489 chromosome...     | Leptospira i... | NA | 312175  | 454 | 454 |
| 99% 6e-123 74.53 4431091 CP043893.1                                   |                 |    |         |     |     |
| Leptospira interrogans serovar Canicola strain 782 chromosome ...     | Leptospira i... | NA | 211880  | 454 | 454 |
| 99% 6e-123 74.53 4556406 CP043884.1                                   |                 |    |         |     |     |
| Leptospira weilii strain FMAS_RT1 chromosome 1, complete sequence     | Leptospira w... | NA | 28184   | 442 | 442 |
| 100% 3e-119 73.99 4275568 CP092206.2                                  |                 |    |         |     |     |
| Leptospira borgpetersenii serovar Mini clone R15-N2012 truncat...     | Leptospira b... | NA | 280507  | 434 | 434 |
| 53% 9e-117 88.12 349 JN627496.1                                       |                 |    |         |     |     |
| Leptospira santarosai strain U233 chromosome I                        | Leptospira s... | NA | 28183   | 171 | 171 |
| 21% 1e-37 87.50 3605957 CP028377.1                                    |                 |    |         |     |     |
| Leptospira santarosai strain U164 chromosome I                        | Leptospira s... | NA | 28183   | 171 | 171 |
| 21% 1e-37 87.50 3730310 CP028370.1                                    |                 |    |         |     |     |
| Leptospira santarosai strain ah2 chromosome I sequence                | Leptospira s... | NA | 28183   | 171 | 171 |
| 21% 1e-37 87.50 3545388 CP022887.1                                    |                 |    |         |     |     |
| Leptospira santarosai strain U160 chromosome I                        | Leptospira s... | NA | 28183   | 151 | 151 |
| 21% 9e-32 83.82 3768600 CP027843.1                                    |                 |    |         |     |     |
| Leptospira santarosai serovar Shermani str. LT 821 chromosome ...     | Leptospira s... | NA | 758847  | 151 | 151 |
| 21% 9e-32 83.82 3659905 CP006694.199% 2e-126 74.53 4556406 CP043884.1 |                 |    |         |     |     |

## Alignments:

>Leptospira interrogans serovar Bataviae strain 1489 chromosome 1, complete sequence  
Sequence ID: CP043893.1 Length: 4431091  
Range 1: 1058849 to 1059488

Score:454 bits(1043), Expect:2e-126,  
Identities:480/644(75%), Gaps:7/644(1%), Strand: Plus/Plus

|       |         |                                                               |         |
|-------|---------|---------------------------------------------------------------|---------|
| Query | 1       | CAGGGAAAAAATGAATGGTGGAAATATCTATTCTGGATTTTGGACGAAAAAGATTCTGCA  | 60      |
|       |         |                                                               |         |
| Sbjct | 1058849 | CAAGAAAAGCAAGAATGGTGGAAATATCTAGTCTGGCTTTTGAACGAAAAGCATTCTTCG  | 1058908 |
| Query | 61      | ACTGAATCCAACA---TAGATTCTCTTTTCGGAAGACGGAGTTTGTCCGCTCCGCCTTCC  | 117     |
|       |         |                                                               |         |
| Sbjct | 1058909 | ACTCAACCTAGGAATTTATATTATCTTCCGAGCGACGGGATTCTGGCGGCTCCGCCTTCC  | 1058968 |
| Query | 118     | GATAAAAAGTTGAGCCAAGGTACCGAAGTAAGATTTCGATTGGTTAACTTCCTTAATAGAG | 177     |
|       |         |                                                               |         |
| Sbjct | 1058969 | GATGAACAATTGAGCCAAGCTACCGAGGTAAGATTTCGATGGGTTGACTTCTTTGGCGGAG | 1059028 |
| Query | 178     | GTTCCGTTGGGTAAAATGCCGACTTTGGATACTTTGGATCTATATCCTCGAGAAGGAAAA  | 237     |
|       |         |                                                               |         |
| Sbjct | 1059029 | GTTACGTTAGGCAAAATGTCTGACTCTCGATAAATTGACGGTGCTCCCCGGCAAAGAAAAG | 1059088 |
| Query | 238     | AATGCTTCTAAACTTTCTTCTTTGGACGGAATTGAACGAGCGTCCGGATTAATTAAATTG  | 297     |
|       |         |                                                               |         |
| Sbjct | 1059089 | AAAGCTCCTAAACTTTCTTCTTTGGATGGAATCGAACGAGCGCCTTGGTTAGCCAGATTG  | 1059148 |
| Query | 298     | AATGTGGAGAGAAATCAAGGCATATCGGATCTCGGTCTTTTGTCAAAAACCTTCCTAATTT | 357     |
|       |         |                                                               |         |
| Sbjct | 1059149 | GACATG---AGCATGCAAGACGTCTCGAATATAGACCTTTTATCGAAA-CTTCCGAATTT  | 1059204 |
| Query | 358     | GAAAACCTTTTAGCGGATCGAATAACTCGATTAAGGATTTGTCTCCACTTTCTCAGTGCAA | 417     |
|       |         |                                                               |         |
| Sbjct | 1059205 | AAAAGTTCTTCACGGATCGTATAACTCGATCAAAGATCTATCTCCGCTTTCTCAGTGCCG  | 1059264 |
| Query | 418     | AAATTTAAATGCGCTTTATCTCAATAAAAAATAAAATCTCCGATGTTTCCCCGCTTTCTTC | 477     |
|       |         |                                                               |         |
| Sbjct | 1059265 | AAACTTAGAAATACTTTATCTCGACAAAAATAAAATTTCCGACGTCTCTCCCCTTTCTTC  | 1059324 |
| Query | 478     | ACTTTCAAAAATAGAACTCTTTGCTTAGCCGACAATCCGATCCAGGATATTCTTCCTTT   | 537     |
|       |         |                                                               |         |
| Sbjct | 1059325 | GCTTTTGGAAATAGAAACGCTTTGGATATCCGACAATCCGATCAAGGATATTCTTCCTTT  | 1059384 |
| Query | 538     | GGCCGGTTTaaaaaaaTTAAAGAATTGAAAGTGCCGTCGAAACTCCCCGAAGAAAATTT   | 597     |
|       |         |                                                               |         |
| Sbjct | 1059385 | AACGGGTTTGAAGAACTGAAAGAAGTGAAGCTTTTCGAAAGAGAATTT              | 1059444 |
| Query | 598     | AGCGAAGTTTAAAGAAATTACGCCCGATGTGAAAATCTCATTTT                  | 641     |
|       |         |                                                               |         |
| Sbjct | 1059445 | AGAACAGTTCAAAAAACTACGTCCCGATGTGAAGATTTCTTTTT                  | 1059488 |

>Leptospira interrogans serovar Canicola strain 782 chromosome 1, complete sequence  
Sequence ID: CP043884.1 Length: 4556406  
Range 1: 3551479 to 3552118

Score:454 bits(1043), Expect:2e-126,  
Identities:480/644(75%), Gaps:7/644(1%), Strand: Plus/Minus

|       |         |                                                               |         |
|-------|---------|---------------------------------------------------------------|---------|
| Query | 1       | CAGGGAAAAAATGAATGGTGGAAATATCTATTCTGGATTTTGGACGAAAAAGATTCTGCA  | 60      |
|       |         |                                                               |         |
| Sbjct | 3552118 | CAAGAAAAGCAAGAATGGTGGAAATATCTAGTCTGGCTTTTGAACGAAAAGCATTCTTCG  | 3552059 |
| Query | 61      | ACTGAATCCAACA---TAGATTCTCTTTTCGGAAGACGGAGTTTGTCCGCTCCGCCTTCC  | 117     |
|       |         |                                                               |         |
| Sbjct | 3552058 | ACTCAACCTAGGAATTTATATTATCTTCCGAGCGACGGGATTCTGGCGGCTCCGCCTTCCG | 3551999 |
| Query | 118     | GATAAAAAGTTGAGCCAAGGTACCGAAGTAAGATTTCGATTGGTTAACTTCCTTAATAGAG | 177     |
|       |         |                                                               |         |
| Sbjct | 3551998 | GATGAACAATTGAGCCAAGCTACCGAGGTAAGATTTCGATGGGTTGACTTCTTTGGCGGAG | 3551939 |
| Query | 178     | GTTCCGTTGGGTAAAATGCCGACTTTGGATACTTTGGATCTATATCCTCGAGAAGGAAAA  | 237     |
|       |         |                                                               |         |
| Sbjct | 3551938 | GTTACGTTAGGCAAAATGTCGACTCTCGATAAATTGACGGTGCTCCCCGGCAAAGAAAAG  | 3551879 |
| Query | 238     | AATGCTTCTAAACTTTCTTCTTTGGACGGAATTGAACGAGCGTCCGGATTAATTAAATTG  | 297     |
|       |         |                                                               |         |
| Sbjct | 3551878 | AAAGCTCCTAAACTTTCTTCTTTGGATGGAATCGAACGAGCGCCTTGGTTAGCCAGATTG  | 3551819 |
| Query | 298     | AATGTGGAGAGAAATCAAGGCATATCGGATCTCGGTCTTTTGTCAAAAACCTCCTAATTT  | 357     |
|       |         |                                                               |         |
| Sbjct | 3551818 | GACATG---AGCATGCAAGACGTCTCGAATATAGACCTTTTATCGAAA-CTTCCGAATTT  | 3551763 |
| Query | 358     | GAAAACCTTTTAGCGGATCGAATAACTCGATTAAGGATTTGTCTCCACTTTCTCAGTGCAA | 417     |
|       |         |                                                               |         |
| Sbjct | 3551762 | AAAAGTTCTTCACGGATCGTATAACTCGATCAAAGATCTATCTCCGCTTTCTCAGTGCCG  | 3551703 |
| Query | 418     | AAATTTAAATGCGCTTTATCTCAATAAAAAATAAAATCTCCGATGTTTCCCCGCTTTCTTC | 477     |
|       |         |                                                               |         |
| Sbjct | 3551702 | AACTTAGAAATACTTTATCTCGACAAAAATAAAATTTCCGACGTCTCTCCCCTTTCTTC   | 3551643 |
| Query | 478     | ACTTTCAAAAATAGAAACTCTTTGCTTAGCCGACAATCCGATCCAGGATATTCTTCCTTT  | 537     |
|       |         |                                                               |         |
| Sbjct | 3551642 | GCTTTTGGAAATAGAAACGCTTTGGATATCCGACAATCCGATCAAGGATATTCTTCCTTT  | 3551583 |
| Query | 538     | GGCCGGTTTtaaaaaaaTTAAAGAATTGAAAGTGCCGTCGAAACTCCCCGAAGAAAATTT  | 597     |
|       |         |                                                               |         |
| Sbjct | 3551582 | AACGGGTTTGAAGAACTGAAAGAAGTAAAATACCGGTGAAGCTTTCGAAAGAGAATTT    | 3551523 |
| Query | 598     | AGCGAAGTTTAAAGAAATTACGCCCCGATGTGAAAATCTCATTTT                 | 641     |
|       |         |                                                               |         |
| Sbjct | 3551522 | AGAACAGTTCAAAAACACTACGTCCCGATGTGAAGATTTCTTTTT                 | 3551479 |
