# Supplementary material for: Leptospira borgpetersenii Leucine-Rich Repeat Proteins Provide Strong Protective Efficacy as Novel Leptospiral Vaccine Candidates
Source: MDPI journal article supplement (doi:10.3390/tropicalmed8010006), 2022-12-22
Supplement: s1 [file s1]

**A**

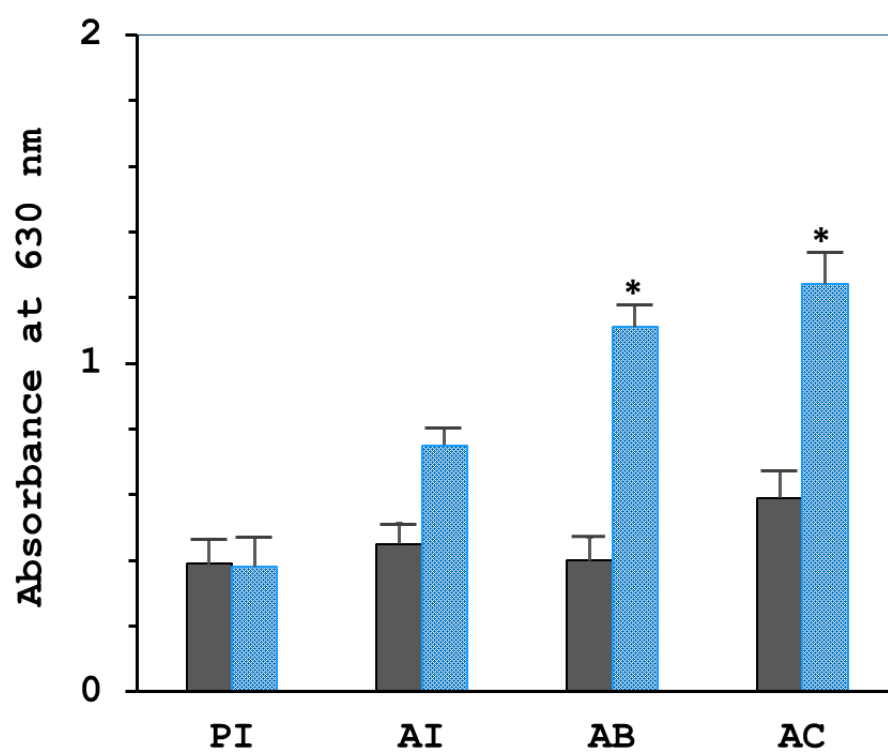

**B**

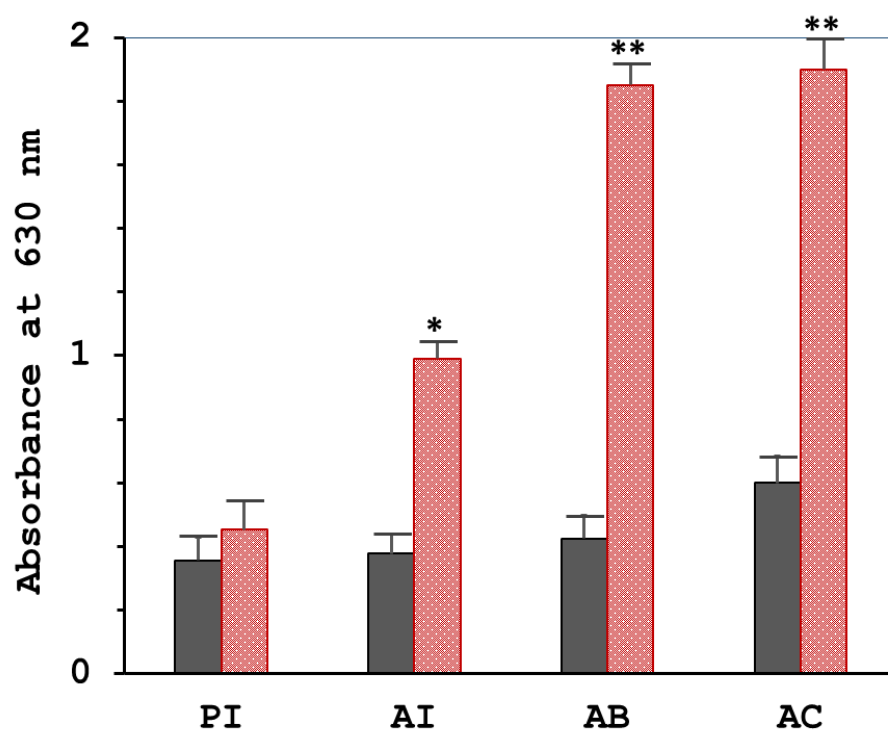

**Supplementary Figure S1.** Induction of specific humoral immune responses in hamsters immunized with LRR proteins, either the rhKU\_Sej\_LRR\_2012 or the rhKU\_Sej\_LRR\_2271. The **(A)** rhKU\_Sej\_LRR\_2012-specific IgG and **(B)** the rhKU\_Sej\_LRR\_2271-specific IgG were evaluated in experiment 1 hamster sera at dilution 1:1,000 by ELISA. The level of specific IgG production shown on Y-axis were compared between the control (Gray bar) and immunized animals with each protein (Green: the rhKU\_Sej\_LRR\_2012 or Orange: the rhKU\_Sej\_LRR\_2271 bars). Sera from the control and immunized animals were collected on day 0 (pre-immunization, PI), day 21 (3 weeks after the 1<sup>st</sup> immunization, AI), day 42 (3 weeks after the 2<sup>nd</sup> immunization or after 1<sup>st</sup> boost, AB), and day 49 – 63 (7 – 21 days after the challenge, AC) as shown on X-axis. The data represent the mean of eight hamsters per treatment group  $\pm$  S.E.M. The absorbance values that higher than 2.0 were calculated from 2 to 3 folds dilution of the original diluted samples. The \*, \*\* indicate significant differences of *p value* <0.05, <0.01 by using the Kruskal-Wallis one-way ANOVA analysis, respectively.
