# Supplementary material for: Leptospira borgpetersenii Leucine-Rich Repeat Proteins Provide Strong Protective Efficacy as Novel Leptospiral Vaccine Candidates
Source: MDPI journal article supplement (doi:10.3390/tropicalmed8010006), 2022-12-22
Supplement: s1 [file s1]

**Supplementary data S3.** BLAST search of the *KU\_R21\_2271* gene (NCBI accession: JX522460) yielded 98.04% to 99.84% identity to 36 sequences from *L. borgpetersenii* genomes.

RID: DW3W9HX8013

Job Title: JX522460: *Leptospira borgpetersenii* serovar...

Program: BLASTN

Query: *Leptospira borgpetersenii* serovar Sejroe leucine-rich repeat protein (LRR) gene, partial cds ID:

JX522460.1(nucleic acid) Length: 612

Database: nt Nucleotide collection (nt)

Sequences producing significant alignments:

| Total Query                                                       | E | Per. | Acc. |  | Scientific      | Common |         | Max   |
|-------------------------------------------------------------------|---|------|------|--|-----------------|--------|---------|-------|
| Description                                                       |   |      |      |  | Name            | Name   | Taxid   | Score |
| Score cover Value Ident Len Accession                             |   |      |      |  |                 |        |         |       |
| Leptospira borgpetersenii serovar Sejroe leucine-rich repeat...   |   |      |      |  | Leptospira b... | NA     | 338220  | 1131  |
| 1131 100% 0.0 100.00 612 JX522460.1                               |   |      |      |  |                 |        |         |       |
| Leptospira borgpetersenii strain R14-L chromosome 1               |   |      |      |  | Leptospira b... | NA     | 174     | 1125  |
| 1125 100% 0.0 99.84 3581013 CP047516.1                            |   |      |      |  |                 |        |         |       |
| Leptospira borgpetersenii strain R6L chromosome 1                 |   |      |      |  | Leptospira b... | NA     | 174     | 1125  |
| 1125 100% 0.0 99.84 3580531 CP047520.1                            |   |      |      |  |                 |        |         |       |
| Leptospira borgpetersenii strain R14 chromosome 1                 |   |      |      |  | Leptospira b... | NA     | 174     | 1125  |
| 1125 100% 0.0 99.84 3601002 CP047504.1                            |   |      |      |  |                 |        |         |       |
| Leptospira borgpetersenii strain R6 chromosome 1                  |   |      |      |  | Leptospira b... | NA     | 174     | 1125  |
| 1125 100% 0.0 99.84 3513910 CP047372.1                            |   |      |      |  |                 |        |         |       |
| Leptospira borgpetersenii strain Mo4 chromosome 1                 |   |      |      |  | Leptospira b... | NA     | 174     | 1125  |
| 1125 100% 0.0 99.84 3581767 CP047334.1                            |   |      |      |  |                 |        |         |       |
| Leptospira borgpetersenii strain R28 chromosome 1                 |   |      |      |  | Leptospira b... | NA     | 174     | 1125  |
| 1125 100% 0.0 99.84 3580481 CP047332.1                            |   |      |      |  |                 |        |         |       |
| Leptospira borgpetersenii strain R23 chromosome 1                 |   |      |      |  | Leptospira b... | NA     | 174     | 1125  |
| 1125 100% 0.0 99.84 3579904 CP047370.1                            |   |      |      |  |                 |        |         |       |
| Leptospira borgpetersenii strain R29 chromosome 1                 |   |      |      |  | Leptospira b... | NA     | 174     | 1125  |
| 1125 100% 0.0 99.84 3580756 CP047330.1                            |   |      |      |  |                 |        |         |       |
| Leptospira borgpetersenii str. 4E chromosome 1                    |   |      |      |  | Leptospira b... | NA     | 1141102 | 1125  |
| 1125 100% 0.0 99.84 3550837 CP015814.2                            |   |      |      |  |                 |        |         |       |
| Leptospira borgpetersenii serovar Ballum strain 56604 chromoso... |   |      |      |  | Leptospira b... | NA     | 280505  | 1125  |
| 1125 100% 0.0 99.84 3550837 CP012029.1                            |   |      |      |  |                 |        |         |       |
| Leptospira borgpetersenii serovar Mini leucine-rich repeat...     |   |      |      |  | Leptospira b... | NA     | 280507  | 1125  |
| 1125 100% 0.0 99.84 612 JX522459.1                                |   |      |      |  |                 |        |         |       |
| Leptospira borgpetersenii serovar Ballum leucine-rich repeat...   |   |      |      |  | Leptospira b... | NA     | 280505  | 1125  |
| 1125 100% 0.0 99.84 612 JX522458.1                                |   |      |      |  |                 |        |         |       |
| Leptospira borgpetersenii strain 34-PK chromosome 1, complete...  |   |      |      |  | Leptospira b... | NA     | 174     | 1120  |
| 1120 100% 0.0 99.67 3603305 CP097464.1                            |   |      |      |  |                 |        |         |       |
| Leptospira borgpetersenii serovar Ceylonica strain Piyasena...    |   |      |      |  | Leptospira b... | NA     | 508536  | 1114  |
| 1114 100% 0.0 99.51 3670231 CP026671.1                            |   |      |      |  |                 |        |         |       |

|                                                                   |                 |    |        |      |
|-------------------------------------------------------------------|-----------------|----|--------|------|
| Leptospira borgpetersenii strain FMAS_AP2 chromosome 1, comple... | Leptospira b... | NA | 174    | 1114 |
| 1114 100% 0.0 99.51 3595436 CP072630.1                            |                 |    |        |      |
| Leptospira borgpetersenii strain FMAS_AP3 chromosome 1, comple... | Leptospira b... | NA | 174    | 1114 |
| 1114 100% 0.0 99.51 3595898 CP072628.1                            |                 |    |        |      |
| Leptospira borgpetersenii strain FMAS_AP4 chromosome 1, comple... | Leptospira b... | NA | 174    | 1114 |
| 1114 100% 0.0 99.51 3595848 CP072626.1                            |                 |    |        |      |
| Leptospira borgpetersenii strain FMAS_PN1 chromosome 1, comple... | Leptospira b... | NA | 174    | 1114 |
| 1114 100% 0.0 99.51 3596207 CP072624.1                            |                 |    |        |      |
| Leptospira borgpetersenii strain FMAS_PN4 chromosome 1, comple... | Leptospira b... | NA | 174    | 1114 |
| 1114 100% 0.0 99.51 3595796 CP072622.1                            |                 |    |        |      |
| Leptospira borgpetersenii strain FMAS_AP8 chromosome 1, comple... | Leptospira b... | NA | 174    | 1114 |
| 1114 100% 0.0 99.51 3595870 CP072620.1                            |                 |    |        |      |
| Leptospira borgpetersenii strain FMAS_AP9 chromosome 1, comple... | Leptospira b... | NA | 174    | 1114 |
| 1114 100% 0.0 99.51 3595582 CP072618.1                            |                 |    |        |      |
| Leptospira borgpetersenii serovar Javanica leucine-rich repeat... | Leptospira b... | NA | 280504 | 1114 |
| 1114 100% 0.0 99.51 612 JX522457.1                                |                 |    |        |      |
| Leptospira borgpetersenii serovar Hardjo strain NVSL S 818...     | Leptospira b... | NA | 328971 | 1070 |
| 1070 100% 0.0 98.20 3584464 CP015052.1                            |                 |    |        |      |
| Leptospira borgpetersenii serovar Hardjo-bovis JB197 chromosom... | Leptospira b... | NA | 355277 | 1070 |
| 1070 100% 0.0 98.20 3576473 CP000350.1                            |                 |    |        |      |
| Leptospira borgpetersenii serovar Hardjo-bovis strain L49...      | Leptospira b... | NA | 338217 | 1064 |
| 1064 100% 0.0 98.04 3620710 CP033440.1                            |                 |    |        |      |
| Leptospira borgpetersenii serovar Hardjo-bovis strain 203...      | Leptospira b... | NA | 338217 | 1064 |
| 1064 100% 0.0 98.04 3589981 CP021412.1                            |                 |    |        |      |
| Leptospira borgpetersenii serovar Hardjo strain NVSL S 1343...    | Leptospira b... | NA | 328971 | 1064 |
| 1064 100% 0.0 98.04 3613654 CP015050.1                            |                 |    |        |      |
| Leptospira borgpetersenii serovar Hardjo strain BK-30 chromoso... | Leptospira b... | NA | 328971 | 1064 |
| 1064 100% 0.0 98.04 3629289 CP015048.1                            |                 |    |        |      |
| Leptospira borgpetersenii serovar Hardjo strain BK-9 chromosome 1 | Leptospira b... | NA | 328971 | 1064 |
| 1064 100% 0.0 98.04 3631634 CP015046.1                            |                 |    |        |      |
| Leptospira borgpetersenii serovar Hardjo strain BK-6 chromosome 1 | Leptospira b... | NA | 328971 | 1064 |
| 1064 100% 0.0 98.04 3649879 CP015044.1                            |                 |    |        |      |
| Leptospira borgpetersenii strain KR39 chromosome 1, complete...   | Leptospira b... | NA | 174    | 1064 |
| 1064 100% 0.0 98.04 3603773 CP096127.1                            |                 |    |        |      |
| Leptospira borgpetersenii serovar Hardjo strain TC129 chromoso... | Leptospira b... | NA | 328971 | 1064 |
| 1064 100% 0.0 98.04 3585597 CP084038.1                            |                 |    |        |      |
| Leptospira borgpetersenii strain TC147 chromosome I, complete...  | Leptospira b... | NA | 174    | 1064 |
| 1064 100% 0.0 98.04 3585599 CP084040.1                            |                 |    |        |      |
| Leptospira borgpetersenii strain TC273 chromosome I, complete...  | Leptospira b... | NA | 174    | 1064 |
| 1064 100% 0.0 98.04 3585577 CP084042.1                            |                 |    |        |      |
| Leptospira borgpetersenii strain TC112 chromosome I, complete...  | Leptospira b... | NA | 174    | 1064 |
| 1064 100% 0.0 98.04 3585599 CP084036.1                            |                 |    |        |      |
| Leptospira borgpetersenii serovar Hardjo-bovis L550 chromosome... | Leptospira b... | NA | 355276 | 1064 |
| 1064 100% 0.0 98.04 3614446 CP000348.1                            |                 |    |        |      |

Alignments:

>Leptospira borgpetersenii serovar Sejroe leucine-rich repeat protein (LRR) gene, partial cds

Sequence ID: JX522460.1 Length: 612

Range 1: 1 to 612

Score:1131 bits(612), Expect:0.0,

Identities:612/612(100%), Gaps:0/612(0%), Strand: Plus/Plus

```
Query 1 GGCTTCGTTTGTCTTACTGCGAGTTTCGACTGTAAAAAGAATGCGGAAGAGATTTTGGGA 60
      |||
Sbjct 1 GGCTTCGTTTGTCTTACTGCGAGTTTCGACTGTAAAAAGAATGCGGAAGAGATTTTGGGA 60

Query 61 GAGGCAAAGGCAAACCGGAATTGGTTCAAACCTTTGGATTTTGAATGCAGAAGTTGTCC 120
      |||
Sbjct 61 GAGGCAAAGGCAAACCGGAATTGGTTCAAACCTTTGGATTTTGAATGCAGAAGTTGTCC 120

Query 121 ACGGTTCCGGAAGAAGTTTTCGGTTTTCCGAATTTAACCAAGTTGGATCTTCGTTTAAAC 180
      |||
Sbjct 121 ACGGTTCCGGAAGAAGTTTTCGGTTTTCCGAATTTAACCAAGTTGGATCTTCGTTTAAAC 180

Query 181 AGTTTGACTTTTCTTCCGGAATTTATCGGAGAATGTAAACGCCTTGAACAACTTAATCTT 240
      |||
Sbjct 181 AGTTTGACTTTTCTTCCGGAATTTATCGGAGAATGTAAACGCCTTGAACAACTTAATCTT 240

Query 241 TTCGGAACGACCTTACAACATTTCCGTCTACGTTTTCTAAATTAAAAAATCTGAAAGTG 300
      |||
Sbjct 241 TTCGGAACGACCTTACAACATTTCCGTCTACGTTTTCTAAATTAAAAAATCTGAAAGTG 300

Query 301 TTAGTGGCGGAAATAACGATTTTACGATTCTACCTCCGAACCTTTGTTTCTTCCGTTG 360
      |||
Sbjct 301 TTAGTGGCGGAAATAACGATTTTACGATTCTACCTCCGAACCTTTGTTTCTTCCGTTG 360

Query 361 ATCAAAATTCTATACGTAGATCGGAATAAATTAACCTCTAACGGAACGGATGTGGAAATT 420
      |||
Sbjct 361 ATCAAAATTCTATACGTAGATCGGAATAAATTAACCTCTAACGGAACGGATGTGGAAATT 420

Query 421 CTCGCTTCTCTTTCTCCTTGGAGGAATTGGATCTGAGTCTGAATTCGGGGATTAAGGCG 480
      |||
Sbjct 421 CTCGCTTCTCTTTCTCCTTGGAGGAATTGGATCTGAGTCTGAATTCGGGGATTAAGGCG 480

Query 481 CTCCCTTTTAATTACGAAAACTTGTAATCTCATTAACTCTAAAAAGATTGAATATTaaa 540
      |||
Sbjct 481 CTCCCTTTTAATTACGAAAACTTGTAATCTCATTAACTCTAAAAAGATTGAATATTAAA 540

Query 541 aaaaCTTCATTAAAGGGAGAGGATGCAGATAAATTGCAGGCGATTCTTCAAATACCAAA 600
      |||
Sbjct 541 AAAAATTCATTAAAGGGAGAGGATGCAGATAAATTGCAGGCGATTCTTCAAATACCAAA 600

Query 601 ATCGACTACTGA 612
      |||
Sbjct 601 ATCGACTACTGA 612
```

>Leptospira borgpetersenii strain R14-L chromosome 1

Sequence ID: CP047516.1 Length: 3581013

Range 1: 2585893 to 2586504

Score:1125 bits(609), Expect:0.0,

Identities:611/612(99%), Gaps:0/612(0%), Strand: Plus/Plus

|       |         |                                                               |         |
|-------|---------|---------------------------------------------------------------|---------|
| Query | 1       | GGCTTCGTTTGTCTTTACTGCGAGTTTCGACTGTAAAAAGAATGCGGAAGAGATTTTGGGA | 60      |
|       |         |                                                               |         |
| Sbjct | 2585893 | GGCTTCGTTTGTCTTTACTGCGAGTTTCGACTGTAAAAAGAATGCGGAAGAGATTTTGGGA | 2585952 |
| Query | 61      | GAGGCAAAGGCAAACCGGAATTGGTTCAAACTTTGGATTTTGAATGCAGAAGTTGTCC    | 120     |
|       |         |                                                               |         |
| Sbjct | 2585953 | GAGGCAAAGGCAAACCGGAATTGGTTCAAACTTTGGATTTTGAATGCAGAAGTTGTCC    | 2586012 |
| Query | 121     | ACGGTTCGGAAGAAGTTTTCGGTTTTCCGAATTTAACCAAGTTGGATCTTCGTTTAAAC   | 180     |
|       |         |                                                               |         |
| Sbjct | 2586013 | ACGGTTCGGAAGAAGTTTTCGGTTTTCCGAATTTAACCAAGTTGGATCTTCGTTTAAAC   | 2586072 |
| Query | 181     | AGTTTGACTTTTCTTCCGGAATTTATCGGAGAATGTAAACGCCTTGAACAACCTTAATCTT | 240     |
|       |         |                                                               |         |
| Sbjct | 2586073 | AGTTTGACTTTTCTTCCGGAATTTATCGGAGAATGTAAACGCCTTGAACAACCTTAATCTT | 2586132 |
| Query | 241     | TTCGGAACGACCTTACAACATTTCCGTCTACGTTTTCTAAATTAATAAATCTGAAAGTG   | 300     |
|       |         |                                                               |         |
| Sbjct | 2586133 | TTCGGAACGACCTTACAACATTTCCGTCTACGTTTTCTAAATTAATAAATCTGAAAGTG   | 2586192 |
| Query | 301     | TTACTGGCGGGAATAACGATTTTACGATTCTACCCTCCGAACCTTTGTTTCTTCCGTTG   | 360     |
|       |         |                                                               |         |
| Sbjct | 2586193 | TTACTGGCGGGAATAACGATTTTACGATTCTACCCTCCGAACCTTTGTTTCTTCCGTTG   | 2586252 |
| Query | 361     | ATCAAAATTCTATACGTAGATCGGAATAAATTAACCTAACGGAACGGATGTGGAAATT    | 420     |
|       |         |                                                               |         |
| Sbjct | 2586253 | ATCAAAATTCTATACGTAGATCGGAATAAATTAACCTAACGGAACGGATGTGGAAATT    | 2586312 |
| Query | 421     | CTCGCTTCTCTTTCTCCTTGGAGGAATTGGATCTGAGTCTGAATTCGGGGATTAAGGCG   | 480     |
|       |         |                                                               |         |
| Sbjct | 2586313 | CTCGCTTCTCTTTCTCCTTGGAGGAATTGGATCTGAGTCTGAATTCGGGGATTAAGGCG   | 2586372 |
| Query | 481     | CTCCCTTTTAATTACGAAAACTTGTAATCTCATTAATCTAAAAAGATTGAATATTaaa    | 540     |
|       |         |                                                               |         |
| Sbjct | 2586373 | CTCCCTTTTAATTACGAAAACTTGTAATCTCATTAATCTAAAAAGATTGAATATTAAA    | 2586432 |
| Query | 541     | aaaaCTTCATTAAAGGGAGAGGATGCAGATAAATTGCAGGCGATTCTTCAAATACCAAA   | 600     |
|       |         |                                                               |         |
| Sbjct | 2586433 | AAACTTCATTAAAGGGAGAGGATGCAGATAAATTGCAGGCGATTCTTCAAACACCAAA    | 2586492 |
| Query | 601     | ATCGACTACTGA 612                                              |         |
|       |         |                                                               |         |
| Sbjct | 2586493 | ATCGACTACTGA 2586504                                          |         |

>Leptospira borgpetersenii strain R6L chromosome 1  
Sequence ID: CP047520.1 Length: 3580531  
Range 1: 2527014 to 2527625

Score:1125 bits(609), Expect:0.0,  
Identities:611/612(99%), Gaps:0/612(0%), Strand: Plus/Plus

|       |         |                                                               |         |
|-------|---------|---------------------------------------------------------------|---------|
| Query | 1       | GGCTTCGTTTGTCTTTACTGCGAGTTTCGACTGTAAAAAGAATGCGGAAGAGATTTTGGGA | 60      |
|       |         |                                                               |         |
| Sbjct | 2527014 | GGCTTCGTTTGTCTTTACTGCGAGTTTCGACTGTAAAAAGAATGCGGAAGAGATTTTGGGA | 2527073 |
| Query | 61      | GAGGCAAAGGCAAACCGGAATTGGTTCAAACTTTGGATTTTGAATGCAGAAGTTGTCC    | 120     |
|       |         |                                                               |         |
| Sbjct | 2527074 | GAGGCAAAGGCAAACCGGAATTGGTTCAAACTTTGGATTTTGAATGCAGAAGTTGTCC    | 2527133 |

|       |         |                                                               |         |
|-------|---------|---------------------------------------------------------------|---------|
| Query | 121     | ACGGTTCGGAAGAAGTTTGCGGTTTTCCGAATTTAACCAAGTTGGATCTTCGTTTAAAC   | 180     |
|       |         |                                                               |         |
| Sbjct | 2527134 | ACGGTTCGGAAGAAGTTTGCGGTTTTCCGAATTTAACCAAGTTGGATCTTCGTTTAAAC   | 2527193 |
| Query | 181     | AGTTTGACTTTTCTTCCGGAATTTATCGGAGAATGTAAACGCCTTGAACAACTTAATCTT  | 240     |
|       |         |                                                               |         |
| Sbjct | 2527194 | AGTTTGACTTTTCTTCCGGAATTTATCGGAGAATGTAAACGCCTTGAACAACTTAATCTT  | 2527253 |
| Query | 241     | TTCGGGAACGACCTTACAACATTTCCGTCTACGTTTTCTAAATTAAAAAATCTGAAAGTG  | 300     |
|       |         |                                                               |         |
| Sbjct | 2527254 | TTCGGGAACGACCTTACAACATTTCCGTCTACGTTTTCTAAATTAAAAAATCTGAAAGTG  | 2527313 |
| Query | 301     | TTACTGGCGGGAAATAACGATTTTACGATTCTACCCTCCGAACTTTGTTCCTCCGTTG    | 360     |
|       |         |                                                               |         |
| Sbjct | 2527314 | TTACTGGCGGGAAATAACGATTTTACGATTCTACCCTCCGAACTTTGTTCCTCCGTTG    | 2527373 |
| Query | 361     | ATCAAAATTCTATACGTAGATCGGAATAAATTAACCTCTAACGGAAACGGATGTGGAAATT | 420     |
|       |         |                                                               |         |
| Sbjct | 2527374 | ATCAAAATTCTATACGTAGATCGGAATAAATTAACCTCTAACGGAAACGGATGTGGAAATT | 2527433 |
| Query | 421     | CTCGCTTCTCTTTCCTCCTTGGAGGAATTGGATCTGAGTCTGAATTCGGGGATTAAGGCG  | 480     |
|       |         |                                                               |         |
| Sbjct | 2527434 | CTCGCTTCTCTTTCCTCCTTGGAGGAATTGGATCTGAGTCTGAATTCGGGGATTAAGGCG  | 2527493 |
| Query | 481     | CTCCCTTTTAATTACGAAAACTTGTAATCTCATTAAATCTAAAAAGATTGAATATTaaa   | 540     |
|       |         |                                                               |         |
| Sbjct | 2527494 | CTCCCTTTTAATTACGAAAACTTGTAATCTCATTAAATCTAAAAAGATTGAATATTAAA   | 2527553 |
| Query | 541     | aaaaCTTCATTAAAGGGAGAGGATGCAGATAAATTGCAGGCGATTCTTCCAAATACCAAA  | 600     |
|       |         |                                                               |         |
| Sbjct | 2527554 | AAAACCTTCATTAAAGGGAGAGGATGCAGATAAATTGCAGGCGATTCTTCCAAACACCAAA | 2527613 |
| Query | 601     | ATCGACTACTGA 612                                              |         |
|       |         |                                                               |         |
| Sbjct | 2527614 | ATCGACTACTGA 2527625                                          |         |

>Leptospira borgpetersenii strain R14 chromosome 1  
Sequence ID: CP047504.1 Length: 3601002  
Range 1: 2545970 to 2546581

Score:1125 bits(609), Expect:0.0,  
Identities:611/612(99%), Gaps:0/612(0%), Strand: Plus/Plus

|       |         |                                                                |         |
|-------|---------|----------------------------------------------------------------|---------|
| Query | 1       | GGCTTCGTTTGTTCCTTACTGCGAGTTTCGACTGTAAAAAGAATGCGGAAGAGATTTTGGGA | 60      |
|       |         |                                                                |         |
| Sbjct | 2545970 | GGCTTCGTTTGTTCCTTACTGCGAGTTTCGACTGTAAAAAGAATGCGGAAGAGATTTTGGGA | 2546029 |
| Query | 61      | GAGGCAAAGGCAAACCGGAATTGGTTCAAACCTTTGGATTTTGGAAATGCAGAAGTTGTCC  | 120     |
|       |         |                                                                |         |
| Sbjct | 2546030 | GAGGCAAAGGCAAACCGGAATTGGTTCAAACCTTTGGATTTTGGAAATGCAGAAGTTGTCC  | 2546089 |
| Query | 121     | ACGGTTCGGAAGAAGTTTGCGGTTTTCCGAATTTAACCAAGTTGGATCTTCGTTTAAAC    | 180     |
|       |         |                                                                |         |
| Sbjct | 2546090 | ACGGTTCGGAAGAAGTTTGCGGTTTTCCGAATTTAACCAAGTTGGATCTTCGTTTAAAC    | 2546149 |
| Query | 181     | AGTTTGACTTTTCTTCCGGAATTTATCGGAGAATGTAAACGCCTTGAACAACTTAATCTT   | 240     |
|       |         |                                                                |         |
| Sbjct | 2546150 | AGTTTGACTTTTCTTCCGGAATTTATCGGAGAATGTAAACGCCTTGAACAACTTAATCTT   | 2546209 |
| Query | 241     | TTCGGGAACGACCTTACAACATTTCCGTCTACGTTTTCTAAATTAAAAAATCTGAAAGTG   | 300     |

|       |         |                                                                   |         |
|-------|---------|-------------------------------------------------------------------|---------|
| Sbjct | 2546210 | <br>TTCGGGAACGACCTTACAACATTTCCGTCTACGTTTTCTAAATTAAAAATCTGAAAGTG   | 2546269 |
| Query | 301     | TTACTGGCGGGAAATAACGATTTTACGATTCTACCCTCCGAACCTTTGTTTCTTCCGTTG      | 360     |
| Sbjct | 2546270 | <br>TTACTGGCGGGAAATAACGATTTTACGATTCTACCCTCCGAACCTTTGTTTCTTCCGTTG  | 2546329 |
| Query | 361     | ATCAAAATTCTATACGTAGATCGGAATAAATTAACCTCTAACGGAAACGGATGTGGAAATT     | 420     |
| Sbjct | 2546330 | <br>ATCAAAATTCTATACGTAGATCGGAATAAATTAACCTCTAACGGAAACGGATGTGGAAATT | 2546389 |
| Query | 421     | CTCGCTTCTCTTTCCTCCTTGGAGGAATTGGATCTGAGTCTGAATTCGGGGATTAAGGCG      | 480     |
| Sbjct | 2546390 | <br>CTCGCTTCTCTTTCCTCCTTGGAGGAATTGGATCTGAGTCTGAATTCGGGGATTAAGGCG  | 2546449 |
| Query | 481     | CTCCCTTTTAATTACGAAAACTTGTAATCTCATTAATCTAAAAAGATTGAATATTaaa        | 540     |
| Sbjct | 2546450 | <br>CTCCCTTTTAATTACGAAAACTTGTAATCTCATTAATCTAAAAAGATTGAATATTAAA    | 2546509 |
| Query | 541     | aaaaCTTCATTAAAGGGAGAGGATGCAGATAAATTGCAGGCGATTCTTCCAAATACCAAA      | 600     |
| Sbjct | 2546510 | <br>AAAACCTTCATTAAAGGGAGAGGATGCAGATAAATTGCAGGCGATTCTTCCAAACACCAAA | 2546569 |
| Query | 601     | ATCGACTACTGA 612<br>                                              |         |
| Sbjct | 2546570 | ATCGACTACTGA 2546581                                              |         |

>Leptospira borgpetersenii strain R6 chromosome 1  
Sequence ID: CP047372.1 Length: 3513910  
Range 1: 2460661 to 2461272

Score:1125 bits(609), Expect:0.0,  
Identities:611/612(99%), Gaps:0/612(0%), Strand: Plus/Plus

|       |         |                                                                   |         |
|-------|---------|-------------------------------------------------------------------|---------|
| Query | 1       | GGCTTCGTTTGTGTTTACTGCGAGTTTCGACTGTAAAAAGAATGCGGAAGAGATTTTGGA      | 60      |
| Sbjct | 2460661 | <br>GGCTTCGTTTGTGTTTACTGCGAGTTTCGACTGTAAAAAGAATGCGGAAGAGATTTTGGA  | 2460720 |
| Query | 61      | GAGGCAAAGGCAAAACCGGAATTGGTTCAAACCTTTGGATTTTGGAATGCAGAAGTTGTCC     | 120     |
| Sbjct | 2460721 | <br>GAGGCAAAGGCAAAACCGGAATTGGTTCAAACCTTTGGATTTTGGAATGCAGAAGTTGTCC | 2460780 |
| Query | 121     | ACGGTTCGGAAGAAGTTTGCGGTTTTCCGAATTTAACCAAGTTGGATCTTCGTTTAAAC       | 180     |
| Sbjct | 2460781 | <br>ACGGTTCGGAAGAAGTTTGCGGTTTTCCGAATTTAACCAAGTTGGATCTTCGTTTAAAC   | 2460840 |
| Query | 181     | AGTTTGACTTTTCTTCCGGAATTTATCGGAGAATGTAAACGCCTTGAACAACCTTAATCTT     | 240     |
| Sbjct | 2460841 | <br>AGTTTGACTTTTCTTCCGGAATTTATCGGAGAATGTAAACGCCTTGAACAACCTTAATCTT | 2460900 |
| Query | 241     | TTCGGGAACGACCTTACAACATTTCCGTCTACGTTTTCTAAATTAAAAATCTGAAAGTG       | 300     |
| Sbjct | 2460901 | <br>TTCGGGAACGACCTTACAACATTTCCGTCTACGTTTTCTAAATTAAAAATCTGAAAGTG   | 2460960 |
| Query | 301     | TTACTGGCGGGAAATAACGATTTTACGATTCTACCCTCCGAACCTTTGTTTCTTCCGTTG      | 360     |
| Sbjct | 2460961 | <br>TTACTGGCGGGAAATAACGATTTTACGATTCTACCCTCCGAACCTTTGTTTCTTCCGTTG  | 2461020 |
| Query | 361     | ATCAAAATTCTATACGTAGATCGGAATAAATTAACCTCTAACGGAAACGGATGTGGAAATT     | 420     |
|       |         |                                                                   |         |

|       |         |                                                              |                             |         |
|-------|---------|--------------------------------------------------------------|-----------------------------|---------|
| Sbjct | 2461021 | ATCAAAATTCTATACGTAGATCGGAATAAATTA                            | ACTCTAACGGAAACGGATGTGGAAATT | 2461080 |
| Query | 421     | CTCGCTTCTCTTTCTCCTTGGAGGAATTGGATCTGAGTCTGAATTCGGGGATTAAGGCG  |                             | 480     |
|       |         |                                                              |                             |         |
| Sbjct | 2461081 | CTCGCTTCTCTTTCTCCTTGGAGGAATTGGATCTGAGTCTGAATTCGGGGATTAAGGCG  |                             | 2461140 |
| Query | 481     | CTCCCTTTTAATTACGAAAACTTGTAATCTCATTAACTCTAAAAAGATTGAATATTaaa  |                             | 540     |
|       |         |                                                              |                             |         |
| Sbjct | 2461141 | CTCCCTTTTAATTACGAAAACTTGTAATCTCATTAACTCTAAAAAGATTGAATATTAAA  |                             | 2461200 |
| Query | 541     | aaaaCTTCATTAAAGGGAGAGGATGCAGATAAATTGCAGGCGATTCTTCCAAATACCAA  |                             | 600     |
|       |         |                                                              |                             |         |
| Sbjct | 2461201 | AAAACCTTCATTAAAGGGAGAGGATGCAGATAAATTGCAGGCGATTCTTCCAAACACCAA |                             | 2461260 |
| Query | 601     | ATCGACTACTGA                                                 | 612                         |         |
|       |         |                                                              |                             |         |
| Sbjct | 2461261 | ATCGACTACTGA                                                 | 2461272                     |         |

>Leptospira borgpetersenii strain Mo4 chromosome 1  
Sequence ID: CP047334.1 Length: 3581767  
Range 1: 2585809 to 2586420

Score:1125 bits(609), Expect:0.0,  
Identities:611/612(99%), Gaps:0/612(0%), Strand: Plus/Plus

|       |         |                                                               |         |
|-------|---------|---------------------------------------------------------------|---------|
| Query | 1       | GGCTTCGTTTGTCTTTACTGCGAGTTTCGACTGTAAAAAGAATGCGGAAGAGATTTTGGGA | 60      |
|       |         |                                                               |         |
| Sbjct | 2585809 | GGCTTCGTTTGTCTTTACTGCGAGTTTCGACTGTAAAAAGAATGCGGAAGAGATTTTGGGA | 2585868 |
| Query | 61      | GAGGCAAAGGCAAACCGGAATTGGTTCAAACCTTTGGATTTTGGAAATGCAGAAGTTGTCC | 120     |
|       |         |                                                               |         |
| Sbjct | 2585869 | GAGGCAAAGGCAAACCGGAATTGGTTCAAACCTTTGGATTTTGGAAATGCAGAAGTTGTCC | 2585928 |
| Query | 121     | ACGGTTCGGAAGAAGTTTTCGGTTTTCCGAATTTAACCAAGTTGGATCTTCGTTTAAAC   | 180     |
|       |         |                                                               |         |
| Sbjct | 2585929 | ACGGTTCGGAAGAAGTTTTCGGTTTTCCGAATTTAACCAAGTTGGATCTTCGTTTAAAC   | 2585988 |
| Query | 181     | AGTTTGACTTTTCTTCCGGAATTTATCGGAGAATGTAAACGCCTTGAACAACCTTAATCTT | 240     |
|       |         |                                                               |         |
| Sbjct | 2585989 | AGTTTGACTTTTCTTCCGGAATTTATCGGAGAATGTAAACGCCTTGAACAACCTTAATCTT | 2586048 |
| Query | 241     | TTCGGGAACGACCTTACAACATTTCCGTCTACGTTTTCTAAATTAAAAAATCTGAAAGTG  | 300     |
|       |         |                                                               |         |
| Sbjct | 2586049 | TTCGGGAACGACCTTACAACATTTCCGTCTACGTTTTCTAAATTAAAAAATCTGAAAGTG  | 2586108 |
| Query | 301     | TTACTGGCGGGAAATAACGATTTTACGATTCTACCCTCCGAACCTTTGTTTCTTCCGTTG  | 360     |
|       |         |                                                               |         |
| Sbjct | 2586109 | TTACTGGCGGGAAATAACGATTTTACGATTCTACCCTCCGAACCTTTGTTTCTTCCGTTG  | 2586168 |
| Query | 361     | ATCAAAATTCTATACGTAGATCGGAATAAATTA                             | 420     |
|       |         |                                                               |         |
| Sbjct | 2586169 | ATCAAAATTCTATACGTAGATCGGAATAAATTA                             | 2586228 |
| Query | 421     | CTCGCTTCTCTTTCTCCTTGGAGGAATTGGATCTGAGTCTGAATTCGGGGATTAAGGCG   | 480     |
|       |         |                                                               |         |
| Sbjct | 2586229 | CTCGCTTCTCTTTCTCCTTGGAGGAATTGGATCTGAGTCTGAATTCGGGGATTAAGGCG   | 2586288 |
| Query | 481     | CTCCCTTTTAATTACGAAAACTTGTAATCTCATTAACTCTAAAAAGATTGAATATTaaa   | 540     |
|       |         |                                                               |         |
| Sbjct | 2586289 | CTCCCTTTTAATTACGAAAACTTGTAATCTCATTAACTCTAAAAAGATTGAATATTAAA   | 2586348 |

|       |         |                                                                |         |
|-------|---------|----------------------------------------------------------------|---------|
| Query | 541     | aaaaCTTCATTAAAGGGAGAGGATGCAGATAAAATTGCAGGCGATTCTTCCAAATACCAAA  | 600     |
|       |         |                                                                |         |
| Sbjct | 2586349 | AAAACCTTCATTAAAGGGAGAGGATGCAGATAAAATTGCAGGCGATTCTTCCAAACACCAAA | 2586408 |
| Query | 601     | ATCGACTACTGA                                                   | 612     |
|       |         |                                                                |         |
| Sbjct | 2586409 | ATCGACTACTGA                                                   | 2586420 |

>Leptospira borgpetersenii strain R28 chromosome 1  
Sequence ID: CP047332.1 Length: 3580481  
Range 1: 2527184 to 2527795

Score:1125 bits(609), Expect:0.0,  
Identities:611/612(99%), Gaps:0/612(0%), Strand: Plus/Plus

|       |         |                                                                |         |
|-------|---------|----------------------------------------------------------------|---------|
| Query | 1       | GGCTTCGTTTGTCTTACTGCGAGTTTCGACTGTAAAAAGAATGCGGAAGAGATTTTGGGA   | 60      |
|       |         |                                                                |         |
| Sbjct | 2527184 | GGCTTCGTTTGTCTTACTGCGAGTTTCGACTGTAAAAAGAATGCGGAAGAGATTTTGGGA   | 2527243 |
| Query | 61      | GAGGCAAAGGCAAACCGGAATTGGTTCAAACCTTTGGATTTTGAATGCAGAAGTTGTCC    | 120     |
|       |         |                                                                |         |
| Sbjct | 2527244 | GAGGCAAAGGCAAACCGGAATTGGTTCAAACCTTTGGATTTTGAATGCAGAAGTTGTCC    | 2527303 |
| Query | 121     | ACGGTTCGGAAGAAGTTTTCGGTTTTCCGAATTTAACCAAGTTGGATCTTCGTTTAAAC    | 180     |
|       |         |                                                                |         |
| Sbjct | 2527304 | ACGGTTCGGAAGAAGTTTTCGGTTTTCCGAATTTAACCAAGTTGGATCTTCGTTTAAAC    | 2527363 |
| Query | 181     | AGTTTGACTTTTCTTCCGGAATTTATCGGAGAATGTAAACGCCTTGAACAACCTTAATCTT  | 240     |
|       |         |                                                                |         |
| Sbjct | 2527364 | AGTTTGACTTTTCTTCCGGAATTTATCGGAGAATGTAAACGCCTTGAACAACCTTAATCTT  | 2527423 |
| Query | 241     | TTCGGGAACGACCTTACAACATTTCCGTCTACGTTTTCTAAATTAAAAAATCTGAAAGTG   | 300     |
|       |         |                                                                |         |
| Sbjct | 2527424 | TTCGGGAACGACCTTACAACATTTCCGTCTACGTTTTCTAAATTAAAAAATCTGAAAGTG   | 2527483 |
| Query | 301     | TTACTGGCGGGAATAACGATTTTACGATTCTACCCTCCGAACCTTTGTTTCTTCCGTTG    | 360     |
|       |         |                                                                |         |
| Sbjct | 2527484 | TTACTGGCGGGAATAACGATTTTACGATTCTACCCTCCGAACCTTTGTTTCTTCCGTTG    | 2527543 |
| Query | 361     | ATCAAAATTCTATACGTAGATCGGAATAAATTAACCTCTAACGGAACGGATGTGGAAATT   | 420     |
|       |         |                                                                |         |
| Sbjct | 2527544 | ATCAAAATTCTATACGTAGATCGGAATAAATTAACCTCTAACGGAACGGATGTGGAAATT   | 2527603 |
| Query | 421     | CTCGCTTCTCTTTCCTCCTTGGAGGAATTGGATCTGAGTCTGAATTCGGGGATTAAGGCG   | 480     |
|       |         |                                                                |         |
| Sbjct | 2527604 | CTCGCTTCTCTTTCCTCCTTGGAGGAATTGGATCTGAGTCTGAATTCGGGGATTAAGGCG   | 2527663 |
| Query | 481     | CTCCCTTTTAATTACGAAAAACTTGTAATCTCATTAATCTAAAAAGATTGAATATTaaa    | 540     |
|       |         |                                                                |         |
| Sbjct | 2527664 | CTCCCTTTTAATTACGAAAAACTTGTAATCTCATTAATCTAAAAAGATTGAATATTAAA    | 2527723 |
| Query | 541     | aaaaCTTCATTAAAGGGAGAGGATGCAGATAAAATTGCAGGCGATTCTTCCAAATACCAAA  | 600     |
|       |         |                                                                |         |
| Sbjct | 2527724 | AAAACCTTCATTAAAGGGAGAGGATGCAGATAAAATTGCAGGCGATTCTTCCAAACACCAAA | 2527783 |
| Query | 601     | ATCGACTACTGA                                                   | 612     |
|       |         |                                                                |         |
| Sbjct | 2527784 | ATCGACTACTGA                                                   | 2527795 |



>Leptospira borgpetersenii strain R23 chromosome 1  
Sequence ID: CP047370.1 Length: 3579904  
Range 1: 2527240 to 2527851

Score:1125 bits(609), Expect:0.0,  
Identities:611/612(99%), Gaps:0/612(0%), Strand: Plus/Plus

|       |         |                                                               |         |
|-------|---------|---------------------------------------------------------------|---------|
| Query | 1       | GGCTTCGTTTGTCTTACTGCGAGTTTCGACTGTAAAAAGAATGCGGAAGAGATTTTGGGA  | 60      |
|       |         |                                                               |         |
| Sbjct | 2527240 | GGCTTCGTTTGTCTTACTGCGAGTTTCGACTGTAAAAAGAATGCGGAAGAGATTTTGGGA  | 2527299 |
| Query | 61      | GAGGCAAAGGCAAACCGGAATTGGTTCAAACCTTTGGATTTTGAATGCAGAAGTTGTCC   | 120     |
|       |         |                                                               |         |
| Sbjct | 2527300 | GAGGCAAAGGCAAACCGGAATTGGTTCAAACCTTTGGATTTTGAATGCAGAAGTTGTCC   | 2527359 |
| Query | 121     | ACGGTTCGGAAGAAGTTTTCGGTTTTCCGAATTTAACCAAGTTGGATCTTCGTTTAAAC   | 180     |
|       |         |                                                               |         |
| Sbjct | 2527360 | ACGGTTCGGAAGAAGTTTTCGGTTTTCCGAATTTAACCAAGTTGGATCTTCGTTTAAAC   | 2527419 |
| Query | 181     | AGTTTGACTTTTCTTCCGGAATTTATCGGAGAATGTAAACGCCTTGAACAACCTTAATCTT | 240     |
|       |         |                                                               |         |
| Sbjct | 2527420 | AGTTTGACTTTTCTTCCGGAATTTATCGGAGAATGTAAACGCCTTGAACAACCTTAATCTT | 2527479 |
| Query | 241     | TTCGGGAACGACCTTACAACATTTCCGTCTACGTTTTCTAAATTAAAAAATCTGAAAGTG  | 300     |
|       |         |                                                               |         |
| Sbjct | 2527480 | TTCGGGAACGACCTTACAACATTTCCGTCTACGTTTTCTAAATTAAAAAATCTGAAAGTG  | 2527539 |
| Query | 301     | TTACTGGCGGGAAATAACGATTTTACGATTCTACCCTCCGAACCTTTGTTTCTTCCGTTG  | 360     |
|       |         |                                                               |         |
| Sbjct | 2527540 | TTACTGGCGGGAAATAACGATTTTACGATTCTACCCTCCGAACCTTTGTTTCTTCCGTTG  | 2527599 |
| Query | 361     | ATCAAAATTCTATACGTAGATCGGAATAAATTAACCTCTAACGGAAACGGATGTGGAAATT | 420     |
|       |         |                                                               |         |
| Sbjct | 2527600 | ATCAAAATTCTATACGTAGATCGGAATAAATTAACCTCTAACGGAAACGGATGTGGAAATT | 2527659 |
| Query | 421     | CTCGCTTCTCTTTCTCCTTGGAGGAATTGGATCTGAGTCTGAATTCGGGGATTAAGGCG   | 480     |
|       |         |                                                               |         |
| Sbjct | 2527660 | CTCGCTTCTCTTTCTCCTTGGAGGAATTGGATCTGAGTCTGAATTCGGGGATTAAGGCG   | 2527719 |
| Query | 481     | CTCCCTTTTAATTACGAAAACTTGTAATCTCATTAAATCTAAAAAGATTGAATATTaaa   | 540     |
|       |         |                                                               |         |
| Sbjct | 2527720 | CTCCCTTTTAATTACGAAAACTTGTAATCTCATTAAATCTAAAAAGATTGAATATTAAA   | 2527779 |
| Query | 541     | aaaaCTTCATTAAAGGGAGAGGATGCAGATAAATTGCAGGCGATTCTTCCAAATACCAAA  | 600     |
|       |         |                                                               |         |
| Sbjct | 2527780 | AAAACCTTCATTAAAGGGAGAGGATGCAGATAAATTGCAGGCGATTCTTCCAAACACCAAA | 2527839 |
| Query | 601     | ATCGACTACTGA 612                                              |         |
|       |         |                                                               |         |
| Sbjct | 2527840 | ATCGACTACTGA 2527851                                          |         |

>Leptospira borgpetersenii strain R29 chromosome 1  
Sequence ID: CP047330.1 Length: 3580756  
Range 1: 2527211 to 2527822

Score:1125 bits(609), Expect:0.0,  
Identities:611/612(99%), Gaps:0/612(0%), Strand: Plus/Plus

|       |         |                                                               |         |
|-------|---------|---------------------------------------------------------------|---------|
| Query | 1       | GGCTTCGTTTGTCTTTACTGCGAGTTTCGACTGTAAAAAGAATGCGGAAGAGATTTTGGGA | 60      |
|       |         |                                                               |         |
| Sbjct | 2527211 | GGCTTCGTTTGTCTTTACTGCGAGTTTCGACTGTAAAAAGAATGCGGAAGAGATTTTGGGA | 2527270 |
| Query | 61      | GAGGCAAAGGCAAACCGGAATTGGTTCAAACCTTTGGATTTTGAATGCAGAAGTTGTCC   | 120     |
|       |         |                                                               |         |
| Sbjct | 2527271 | GAGGCAAAGGCAAACCGGAATTGGTTCAAACCTTTGGATTTTGAATGCAGAAGTTGTCC   | 2527330 |
| Query | 121     | ACGGTTCGGAAGAAGTTTGCAGTTTCCGAATTTAACCAAGTTGGATCTTCGTTTAAAC    | 180     |
|       |         |                                                               |         |
| Sbjct | 2527331 | ACGGTTCGGAAGAAGTTTGCAGTTTCCGAATTTAACCAAGTTGGATCTTCGTTTAAAC    | 2527390 |
| Query | 181     | AGTTTGACTTTTCTTCCGGAATTTATCGGAGAATGTAAACGCCTTGAACAACCTTAATCTT | 240     |
|       |         |                                                               |         |
| Sbjct | 2527391 | AGTTTGACTTTTCTTCCGGAATTTATCGGAGAATGTAAACGCCTTGAACAACCTTAATCTT | 2527450 |
| Query | 241     | TTCGGAACGACCTTACAACATTTCCGTCTACGTTTTCTAAATTAATAAATCTGAAAGTG   | 300     |
|       |         |                                                               |         |
| Sbjct | 2527451 | TTCGGAACGACCTTACAACATTTCCGTCTACGTTTTCTAAATTAATAAATCTGAAAGTG   | 2527510 |
| Query | 301     | TTACTGGCGGGAATAACGATTTTACGATTCTACCCTCCGAACCTTTGTTTCTTCCGTTG   | 360     |
|       |         |                                                               |         |
| Sbjct | 2527511 | TTACTGGCGGGAATAACGATTTTACGATTCTACCCTCCGAACCTTTGTTTCTTCCGTTG   | 2527570 |
| Query | 361     | ATCAAAATTCTATACGTAGATCGGAATAAATTAACCTAACGGAACGGATGTGGAAATT    | 420     |
|       |         |                                                               |         |
| Sbjct | 2527571 | ATCAAAATTCTATACGTAGATCGGAATAAATTAACCTAACGGAACGGATGTGGAAATT    | 2527630 |
| Query | 421     | CTCGCTTCTCTTTCCTCCTTGGAGGAATTGGATCTGAGTCTGAATTCGGGGATTAAGGCG  | 480     |
|       |         |                                                               |         |
| Sbjct | 2527631 | CTCGCTTCTCTTTCCTCCTTGGAGGAATTGGATCTGAGTCTGAATTCGGGGATTAAGGCG  | 2527690 |
| Query | 481     | CTCCCTTTTAATTACGAAAACTTGTAATCTCATTAATCTAAAAAGATTGAATATTaaa    | 540     |
|       |         |                                                               |         |
| Sbjct | 2527691 | CTCCCTTTTAATTACGAAAACTTGTAATCTCATTAATCTAAAAAGATTGAATATTAAA    | 2527750 |
| Query | 541     | aaaaCTTCATTAAAGGGAGAGGATGCAGATAAATTGCAGGCGATTCTTCAAATACCAAA   | 600     |
|       |         |                                                               |         |
| Sbjct | 2527751 | AAACTTCATTAAAGGGAGAGGATGCAGATAAATTGCAGGCGATTCTTCAAACACCAAA    | 2527810 |
| Query | 601     | ATCGACTACTGA 612                                              |         |
|       |         |                                                               |         |
| Sbjct | 2527811 | ATCGACTACTGA 2527822                                          |         |

>Leptospira borgpetersenii str. 4E chromosome 1  
Sequence ID: CP015814.2 Length: 3550837  
Range 1: 2151282 to 2151893

Score:1125 bits(609), Expect:0.0,  
Identities:611/612(99%), Gaps:0/612(0%), Strand: Plus/Plus

|       |         |                                                               |         |
|-------|---------|---------------------------------------------------------------|---------|
| Query | 1       | GGCTTCGTTTGTCTTTACTGCGAGTTTCGACTGTAAAAAGAATGCGGAAGAGATTTTGGGA | 60      |
|       |         |                                                               |         |
| Sbjct | 2151282 | GGCTTCGTTTGTCTTTACTGCGAGTTTCGACTGTAAAAAGAATGCGGAAGAGATTTTGGGA | 2151341 |
| Query | 61      | GAGGCAAAGGCAAACCGGAATTGGTTCAAACCTTTGGATTTTGAATGCAGAAGTTGTCC   | 120     |
|       |         |                                                               |         |
| Sbjct | 2151342 | GAGGCAAAGGCAAACCGGAATTGGTTCAAACCTTTGGATTTTGAATGCAGAAGTTGTCC   | 2151401 |

|       |         |                                                               |         |
|-------|---------|---------------------------------------------------------------|---------|
| Query | 121     | ACGGTTCGGAAGAAGTTTGCGGTTTTCCGAATTTAACCAAGTTGGATCTTCGTTTAAAC   | 180     |
|       |         |                                                               |         |
| Sbjct | 2151402 | ACGGTTCGGAAGAAGTTTGCGGTTTTCCGAATTTAACCAAGTTGGATCTTCGTTTAAAC   | 2151461 |
| Query | 181     | AGTTTGACTTTTCTTCCGGAATTTATCGGAGAATGTAAACGCCTTGAACAACTTAATCTT  | 240     |
|       |         |                                                               |         |
| Sbjct | 2151462 | AGTTTGACTTTTCTTCCGGAATTTATCGGAGAATGTAAACGCCTTGAACAACTTAATCTT  | 2151521 |
| Query | 241     | TTCGGGAACGACCTTACAACATTTCCGTCTACGTTTTCTAAATTAAAAAATCTGAAAGTG  | 300     |
|       |         |                                                               |         |
| Sbjct | 2151522 | TTCGGGAACGACCTTACAACATTTCCGTCTACGTTTTCTAAATTAAAAAATCTGAAAGTG  | 2151581 |
| Query | 301     | TTACTGGCGGGAAATAACGATTTTACGATTCTACCCTCCGAACTTTGTTCCTCCGTTG    | 360     |
|       |         |                                                               |         |
| Sbjct | 2151582 | TTACTGGCGGGAAATAACGATTTTACGATTCTACCCTCCGAACTTTGTTCCTCCGTTG    | 2151641 |
| Query | 361     | ATCAAAATTCTATACGTAGATCGGAATAAATTAACCTCTAACGGAAACGGATGTGGAAATT | 420     |
|       |         |                                                               |         |
| Sbjct | 2151642 | ATCAAAATTCTATACGTAGATCGGAATAAATTAACCTCTAACGGAAACGGATGTGGAAATT | 2151701 |
| Query | 421     | CTCGCTTCTCTTTCCTCCTTGGAGGAATTGGATCTGAGTCTGAATTCGGGGATTAAGGCG  | 480     |
|       |         |                                                               |         |
| Sbjct | 2151702 | CTCGCTTCTCTTTCCTCCTTGGAGGAATTGGATCTGAGTCTGAATTCGGGGATTAAGGCG  | 2151761 |
| Query | 481     | CTCCCTTTTAATTACGAAAACTTGTAATCTCATTAAATCTAAAAAGATTGAATATTaaa   | 540     |
|       |         |                                                               |         |
| Sbjct | 2151762 | CTCCCTTTTAATTACGAAAACTTGTAATCTCATTAAATCTAAAAAGATTGAATATTAAA   | 2151821 |
| Query | 541     | aaaaCTTCATTAAAGGGAGAGGATGCAGATAAATTGCAGGCGATTCTTCCAAATACCAAA  | 600     |
|       |         |                                                               |         |
| Sbjct | 2151822 | AAAACCTTCATTAAAGGGAGAGGATGCAGATAAATTGCAGGCGATTCTTCCAAACACCAAA | 2151881 |
| Query | 601     | ATCGACTACTGA 612                                              |         |
|       |         |                                                               |         |
| Sbjct | 2151882 | ATCGACTACTGA 2151893                                          |         |

>Leptospira borgpetersenii serovar Ballum strain 56604 chromosome 1, complete sequence  
Sequence ID: CP012029.1 Length: 3550837  
Range 1: 2151282 to 2151893

Score:1125 bits(609), Expect:0.0,  
Identities:611/612(99%), Gaps:0/612(0%), Strand: Plus/Plus

|       |         |                                                              |         |
|-------|---------|--------------------------------------------------------------|---------|
| Query | 1       | GGCTTCGTTTGTCTTACTGCGAGTTTCGACTGTAAAAAGAATGCGGAAGAGATTTTGGGA | 60      |
|       |         |                                                              |         |
| Sbjct | 2151282 | GGCTTCGTTTGTCTTACTGCGAGTTTCGACTGTAAAAAGAATGCGGAAGAGATTTTGGGA | 2151341 |
| Query | 61      | GAGGCAAAGGCAAACCGGAATTGGTTCAAACCTTGGATTTTGGAAATGCAGAAGTTGTCC | 120     |
|       |         |                                                              |         |
| Sbjct | 2151342 | GAGGCAAAGGCAAACCGGAATTGGTTCAAACCTTGGATTTTGGAAATGCAGAAGTTGTCC | 2151401 |
| Query | 121     | ACGGTTCGGAAGAAGTTTGCGGTTTTCCGAATTTAACCAAGTTGGATCTTCGTTTAAAC  | 180     |
|       |         |                                                              |         |
| Sbjct | 2151402 | ACGGTTCGGAAGAAGTTTGCGGTTTTCCGAATTTAACCAAGTTGGATCTTCGTTTAAAC  | 2151461 |
| Query | 181     | AGTTTGACTTTTCTTCCGGAATTTATCGGAGAATGTAAACGCCTTGAACAACTTAATCTT | 240     |
|       |         |                                                              |         |
| Sbjct | 2151462 | AGTTTGACTTTTCTTCCGGAATTTATCGGAGAATGTAAACGCCTTGAACAACTTAATCTT | 2151521 |
| Query | 241     | TTCGGGAACGACCTTACAACATTTCCGTCTACGTTTTCTAAATTAAAAAATCTGAAAGTG | 300     |

|       |         |                                                                   |         |
|-------|---------|-------------------------------------------------------------------|---------|
| Sbjct | 2151522 | <br>TTCGGAACGACCTTACAACATTTCCGTCTACGTTTTCTAAATTAAAAATCTGAAAGTG    | 2151581 |
| Query | 301     | TTACTGGCGGGAAATAACGATTTTACGATTCTACCCTCCGAACCTTTGTTTCTTCCGTTG      | 360     |
| Sbjct | 2151582 | <br>TTACTGGCGGGAAATAACGATTTTACGATTCTACCCTCCGAACCTTTGTTTCTTCCGTTG  | 2151641 |
| Query | 361     | ATCAAAATTCTATACGTAGATCGGAATAAATTAACCTCTAACGGAAACGGATGTGGAAATT     | 420     |
| Sbjct | 2151642 | <br>ATCAAAATTCTATACGTAGATCGGAATAAATTAACCTCTAACGGAAACGGATGTGGAAATT | 2151701 |
| Query | 421     | CTCGCTTCTCTTTCTCCTTGGAGGAATTGGATCTGAGTCTGAATTCGGGGATTAAGGCG       | 480     |
| Sbjct | 2151702 | <br>CTCGCTTCTCTTTCTCCTTGGAGGAATTGGATCTGAGTCTGAATTCGGGGATTAAGGCG   | 2151761 |
| Query | 481     | CTCCCTTTTAATTACGAAAACTTGTAATCTCATTAACTCTAAAAAGATTGAATATTaaa       | 540     |
| Sbjct | 2151762 | <br>CTCCCTTTTAATTACGAAAACTTGTAATCTCATTAACTCTAAAAAGATTGAATATTAAA   | 2151821 |
| Query | 541     | aaaaCTTCATTAAAGGGAGAGGATGCAGATAAATTGCAGGCGATTCTTCCAAATACCAAA      | 600     |
| Sbjct | 2151822 | <br>AAAACCTTCATTAAAGGGAGAGGATGCAGATAAATTGCAGGCGATTCTTCCAAACACCAAA | 2151881 |
| Query | 601     | ATCGACTACTGA 612                                                  |         |
| Sbjct | 2151882 | <br>ATCGACTACTGA 2151893                                          |         |

>Leptospira borgpetersenii serovar Mini leucine-rich repeat protein (LRR) gene, partial cds

Sequence ID: JX522459.1 Length: 612

Range 1: 1 to 612

Score:1125 bits(609), Expect:0.0,

Identities:611/612(99%), Gaps:0/612(0%), Strand: Plus/Plus

|       |     |                                                                  |     |
|-------|-----|------------------------------------------------------------------|-----|
| Query | 1   | GGCTTCGTTTGTCTTACTGCGAGTTTCGACTGTAAAAAGAATGCGGAAGAGATTTTGGA      | 60  |
| Sbjct | 1   | <br>GGCTTCGTTTGTCTTACTGCGAGTTTCGACTGTAAAAAGAATGCGGAAGAGATTTTGGA  | 60  |
| Query | 61  | GAGGCAAAGGCAAACCGGAATTGGTTCAAACCTTGGATTTTGGAATGCAGAAGTTGTCC      | 120 |
| Sbjct | 61  | <br>GAGGCAAAGGCAAACCGGAATTGGTTCAAACCTTGGATTTTGGAATGCAGAAGTTGTCC  | 120 |
| Query | 121 | ACGGTTCGGAAGAAGTTTTCGCTTTTCCGAATTTAACCAAGTTGGATCTTCGTTTAAAC      | 180 |
| Sbjct | 121 | <br>ACGGTTCGGAAGAAGTTTTCGCTTTTCCGAATTTAACCAAGTTGGATCTTCGTTTAAAC  | 180 |
| Query | 181 | AGTTTGACTTTTCTTCCGGAATTTATCGGAGAATGTAAACGCCTTGAACAACTTAATCTT     | 240 |
| Sbjct | 181 | <br>AGTTTGACTTTTCTTCCGGAATTTATCGGAGAATGTAAACGCCTTGAACAACTTAATCTT | 240 |
| Query | 241 | TTCGGAACGACCTTACAACATTTCCGTCTACGTTTTCTAAATTAAAAATCTGAAAGTG       | 300 |
| Sbjct | 241 | <br>TTCGGAACGACCTTACAACATTTCCGTCTACGTTTTCTAAATTAAAAATCTGAAAGTG   | 300 |
| Query | 301 | TTACTGGCGGGAAATAACGATTTTACGATTCTACCCTCCGAACCTTTGTTTCTTCCGTTG     | 360 |
| Sbjct | 301 | <br>TTACTGGCGGGAAATAACGATTTTACGATTCTACCCTCCGAACCTTTGTTTCTTCCGTTG | 360 |
| Query | 361 | ATCAAAATTCTATACGTAGATCGGAATAAATTAACCTCTAACGGAAACGGATGTGGAAATT    | 420 |

|       |     |                                                                  |     |
|-------|-----|------------------------------------------------------------------|-----|
| Sbjct | 361 | <br>ATCAAAATTCTATACGTAGATCGGAATAAATTAACTCTAACGGAAACGGATGTGGAAATT | 420 |
| Query | 421 | CTCGCTTCTCTTTCTCTTGGAGGAATTGGATCTGAGTCTGAATTCGGGGATTAAGGCG       | 480 |
| Sbjct | 421 | <br>CTCGCTTCTCTTTCTCTTGGAGGAATTGGATCTGAGTCTGAATTCGGGGATTAAGGCG   | 480 |
| Query | 481 | CTCCCTTTTAATTACGAAAACTTGTAATCTCATTAAATCTAAAAAGATTGAATATTaaa      | 540 |
| Sbjct | 481 | <br>CTCCCTTTTAATTACGAAAACTTGTAATCTCATTAAATTTAAAAAGATTGAATATTAAA  | 540 |
| Query | 541 | aaaaCTTCATTAAAGGGAGAGGATGCAGATAAATTGCAGGCGATTCTTCCAAATACCAA      | 600 |
| Sbjct | 541 | <br>AAAACCTTCATTAAAGGGAGAGGATGCAGATAAATTGCAGGCGATTCTTCCAAATACCAA | 600 |
| Query | 601 | ATCGACTACTGA 612                                                 |     |
| Sbjct | 601 | <br>ATCGACTACTGA 612                                             |     |

>Leptospira borgpetersenii serovar Ballum leucine-rich repeat protein (LRR) gene, partial cds

Sequence ID: JX522458.1 Length: 612

Range 1: 1 to 612

Score:1125 bits(609), Expect:0.0,  
Identities:611/612(99%), Gaps:0/612(0%), Strand: Plus/Plus

|       |     |                                                                  |     |
|-------|-----|------------------------------------------------------------------|-----|
| Query | 1   | GGCTTCGTTTGTTTTACTGCGAGTTTCGACTGTAAAAAGAATGCGGAAGAGATTTTGGA      | 60  |
| Sbjct | 1   | <br>GGCTTCGTTTGTTTTACTGCGAGTTTCGACTGTAAAAAGAATGCGGAAGAGATTTTGGA  | 60  |
| Query | 61  | GAGGCAAAGGCAAACCGGAATTGGTTCAAACCTTTGGATTTTGAATGCAGAAGTTGTCC      | 120 |
| Sbjct | 61  | <br>GAGGCAAAGGCAAACCGGAATTGGTTCAAACCTTTGGATTTTGAATGCAGAAGTTGTCC  | 120 |
| Query | 121 | ACGGTTCCGGAAGAAGTTTGCGGTTTTCCGAATTTAACCAAGTTGGATCTTCGTTTAAAC     | 180 |
| Sbjct | 121 | <br>ACGGTTCCGGAAGAAGTTTGCGGTTTTCCGAATTTAACCAAGTTGGATCTTCGTTTAAAC | 180 |
| Query | 181 | AGTTTGACTTTTCTTCCGGAATTTATCGGAGAATGTAAACGCCTTGAACAACTTAATCTT     | 240 |
| Sbjct | 181 | <br>AGTTTGACTTTTCTTCCGGAATTTATCGGAGAATGTAAACGCCTTGAACAACTTAATCTT | 240 |
| Query | 241 | TTCGGGAACGACCTTACAACATTTCCGTCTACGTTTTCTAAATTAAAAAATCTGAAAGTG     | 300 |
| Sbjct | 241 | <br>TTCGGGAACGACCTTACAACATTTCCGTCTACGTTTTCTAAATTAAAAAATCTGAAAGTG | 300 |
| Query | 301 | TTACTGGCGGGAAATAACGATTTTACGATTCTACCCTCCGAACCTTTGTTTCTTCCGTTG     | 360 |
| Sbjct | 301 | <br>TTACTGGCGGGAAATAACGATTTTACGATTCTACCCTCCGAACCTTTGTTTCTTCCGTTG | 360 |
| Query | 361 | ATCAAAATTCTATACGTAGATCGGAATAAATTAACTCTAACGGAAACGGATGTGGAAATT     | 420 |
| Sbjct | 361 | <br>ATCAAAATTCTATACGTAGATCGGAATAAATTAACTCTAACGGAAACGGATGTGGAAATT | 420 |
| Query | 421 | CTCGCTTCTCTTTCTCTTGGAGGAATTGGATCTGAGTCTGAATTCGGGGATTAAGGCG       | 480 |
| Sbjct | 421 | <br>CTCGCTTCTCTTTCTCTTGGAGGAATTGGATCTGAGTCTGAATTCGGGGATTAAGGCG   | 480 |
| Query | 481 | CTCCCTTTTAATTACGAAAACTTGTAATCTCATTAAATCTAAAAAGATTGAATATTaaa      | 540 |

|       |     |  |                                                               |     |
|-------|-----|--|---------------------------------------------------------------|-----|
| Sbjct | 481 |  | CTCCCTTTTAATTACGAAAACTTGTAATCTCATTAACTCTAAAAAGATTGAATATTAAA   | 540 |
| Query | 541 |  | aaaaCTTCATTAAAGGGAGAGGATGCAGATAAAATTGCAGGCGATTCTTCCAAATACCAAA | 600 |
| Sbjct | 541 |  | AAACTTCATTAAAGGGAGAGGATGCAGATAAAATTGCAGGCGATTCTTCCAAATACCAAA  | 600 |
| Query | 601 |  | ATCGACTACTGA                                                  | 612 |
| Sbjct | 601 |  | ATCGACTACTGA                                                  | 612 |

>Leptospira borgpetersenii strain 34-PK chromosome 1, complete sequence  
Sequence ID: CP097464.1 Length: 3603305  
Range 1: 943987 to 944598

Score:1120 bits(606), Expect:0.0,  
Identities:610/612(99%), Gaps:0/612(0%), Strand: Plus/Plus

|       |        |                                                               |        |
|-------|--------|---------------------------------------------------------------|--------|
| Query | 1      | GGCTTCGTTTGTCTTACTGCGAGTTTCGACTGTAAAAAGAATGCGGAAGAGATTTTGGGA  | 60     |
| Sbjct | 943987 | GGCTTCGTTTGTCTTACTGCGAGTTTCGACTGTAAAAAGAATGCGGAAGAGATTTTGGGA  | 944046 |
| Query | 61     | GAGGCAAAGGCAAAACCGGAATTGGTTCAAACCTTTGGATTTTGAATGCAGAAGTTGTCC  | 120    |
| Sbjct | 944047 | GAGGCAAAGGCAAAACCGGAATTGGTTCAAACCTTTGGATTTTGAATGCAGAAGTTGTCC  | 944106 |
| Query | 121    | ACGGTTCCGGAAGAAGTTTTCGGGTTTCCGAATTTAACCAAGTTGGATCTTCGTTTAAAC  | 180    |
| Sbjct | 944107 | ACGGTTCCGGAAGAAGTTTTCGGGTTTCCGAATTTAACCAAGTTGGATCTTCGTTTAAAC  | 944166 |
| Query | 181    | AGTTTGACTTTTCTTCCGGAATTTATCGGAGAATGTAAACGCCTTGAACAACCTTAATCTT | 240    |
| Sbjct | 944167 | AGTTTGACTTTTCTTCCGGAATTTATCGGAGAATGTAAACGCCTTGAACAACCTTAATCTT | 944226 |
| Query | 241    | TTCGGGAACGACCTTACAACATTTCCGTCTACGTTTTCTAAATTAAAAAATCTGAAAGTG  | 300    |
| Sbjct | 944227 | TTCGGGAACGACCTTACAACATTTCCGTCTACGTTTTCTAAATTAAAAAATCTGAAAGTG  | 944286 |
| Query | 301    | TTACTGGCGGGAAATAACGATTTTACGATTCTACCCTCCGAACCTTTGTTTCTTCCGTTG  | 360    |
| Sbjct | 944287 | TTACTGGCGGGAAATAACGATTTTACGATTCTACCCTCCGAACCTTTGTTTCTTCCGTTG  | 944346 |
| Query | 361    | ATCAAAATTCTATACGTAGATCGGAATAAATTAACCTAACGGAAACGGATGTGGAAATT   | 420    |
| Sbjct | 944347 | ATCAAAATTTTATACGTAGATCGGAATAAATTAACCTAACGGAAACGGATGTGGAAATT   | 944406 |
| Query | 421    | CTCGCTTCTCTTCTCCTTGGAGGAATTGGATCTGAGTCTGAATTCGGGGATTAAGGCG    | 480    |
| Sbjct | 944407 | CTCGCTTCTCTTCTCCTTGGAGGAATTGGATCTGAGTCTGAATTCGGGGATTAAGGCG    | 944466 |
| Query | 481    | CTCCCTTTTAATTACGAAAACTTGTAATCTCATTAACTCTAAAAAGATTGAATATTaaa   | 540    |
| Sbjct | 944467 | CTCCCTTTTAATTACGAAAACTTGTAATCTCATTAACTCTAAAAAGATTGAATATTAAA   | 944526 |
| Query | 541    | aaaaCTTCATTAAAGGGAGAGGATGCAGATAAAATTGCAGGCGATTCTTCCAAATACCAAA | 600    |
| Sbjct | 944527 | AAACTTCATTAAAGGGAGAGGATGCAGATAAAATTGCAGGCGATTCTTCCAAACACCAAA  | 944586 |
| Query | 601    | ATCGACTACTGA                                                  | 612    |

Sbjct 944587 ATCGACTACTGA 944598

>Leptospira borgpetersenii serovar Ceylonica strain Piyasena chromosome 1, complete sequence

Sequence ID: CP026671.1 Length: 3670231

Range 1: 3098426 to 3099037

Score:1114 bits(603), Expect:0.0,

Identities:609/612(99%), Gaps:0/612(0%), Strand: Plus/Minus

```
Query 1      GGCTTCGTTTGTGTTTACTGCGAGTTTCGACTGTAAAAAGAATGCGGAAGAGATTTTGGGA 60
              |||
Sbjct 3099037 GGCTTCGTTTGTGTTTACTGCGAGTTTCGACTGTAAAAAGAATGCGGAAGAGATTTTGGGA 3098978

Query 61      GAGGCAAAGGCAAACCGGAATTGGTTCAAACTTTGGATTTTGAATGCAGAAGTTGTCC 120
              |||
Sbjct 3098977 GAGGCAAAGGCAAACCGGAATTGGTTCAAACTTTGGATTTTGAATGCAGAAGTTGTCC 3098918

Query 121     ACGGTTCCGGAAGAAGTTTGCGGTTTTCCGAATTTAACCAAGTTGGATCTTCGTTTAAAC 180
              |||
Sbjct 3098917 ACGGTTCCGGAAGAAGTTTGCGGTTTTCCGAATTTAACCAAGTTGGATCTTCGTTTAAAC 3098858

Query 181     AGTTTGACTTTTCTTCCGGAATTTATCGGAGAATGTAAACGCCTTGAACAACTTAATCTT 240
              |||
Sbjct 3098857 AGTTTGACTTTTCTTCCGGAATTTATCGGAGAATGTAAACGCCTTGAACAACTTAATCTT 3098798

Query 241     TTCGGAACGACCTTACAACATTTCCGTCTACGTTTTCTAAATTAAAAAATCTGAAAGTG 300
              |||
Sbjct 3098797 TTCGGAACGATCTTACAACATTTCCGTCTACGTTTTCTAAATTAAAAAATCTGAAAGTG 3098738

Query 301     TTACTGGCGGGAAATAACGATTTTACGATTCTACCCTCCGAACTTTGTGTTCTTCCGTTG 360
              |||
Sbjct 3098737 TTACTGGCGGGAAATAACGATTTTACGATTCTACCCTCCGAACTTTGTGTTCTTCCGTTG 3098678

Query 361     ATCAAAATTCTATACGTAGATCGGAATAAATTAACCTCTAACGGAACGGATGTGGAAATT 420
              |||
Sbjct 3098677 ATCAAAATTTTATACGTAGATCGGAATAAATTAACCTCTAACGGAACGGATGTGGAAATT 3098618

Query 421     CTCGCTTCTCTTTCCTCCTTGAGGAATTGGATCTGAGTCTGAATTCGGGGATTAAGGCG 480
              |||
Sbjct 3098617 CTCGCTTCTCTTTCCTCCTTGAGGAATTGGATCTGAGTCTGAATTCGGGGATTAAGGCG 3098558

Query 481     CTCCCTTTTAATTACGAAAACTTGTAATCTCATTAACTCTAAAAAGATTGAATATTaaa 540
              |||
Sbjct 3098557 CTCCCTTTTAATTACGAAAACTTGTAATCTCATTAACTCTAAAAAGATTGAATATTAAA 3098498

Query 541     aaaaCTTCATTAAAGGGAGAGGATGCAGATAAATTGCAGGCGATTCTTCCAAATACCAA 600
              |||
Sbjct 3098497 AAAACTTCATTAAAGGGAGAGGATGCAGATAAATTGCAGGCGATTCTTCCAAACACCAA 3098438

Query 601     ATCGACTACTGA 612
              |||
Sbjct 3098437 ATCGACTACTGA 3098426
```

>Leptospira borgpetersenii strain FMAS\_AP2 chromosome 1, complete sequence

Sequence ID: CP072630.1 Length: 3595436

Range 1: 939788 to 940399

Score:1114 bits(603), Expect:0.0,  
Identities:609/612(99%), Gaps:0/612(0%), Strand: Plus/Plus

|       |        |                                                               |        |
|-------|--------|---------------------------------------------------------------|--------|
| Query | 1      | GGCTTCGTTTGTCTTACTGCGAGTTTCGACTGTAAAAAGAATGCGGAAGAGATTTTGGGA  | 60     |
|       |        |                                                               |        |
| Sbjct | 939788 | GGCTTCGTTTGTCTTACTGCGAGTTTCGACTGTAAAAAGAATGCGGAAGAGATTTTGGGA  | 939847 |
| Query | 61     | GAGGCAAAGGCAAAACCGGAATTGGTTCAAACCTTGGATTTTGAATGCAGAAGTTGTCC   | 120    |
|       |        |                                                               |        |
| Sbjct | 939848 | GAGGCAAAGGCAAAACCGGAATTGGTTCAAACCTTGGATTTTGAATGCAGAAGTTGTCC   | 939907 |
| Query | 121    | ACGTTTCCGGAAGAAGTTTTCGGTTTCCGAATTTAACCAAGTTGGATCTTCGTTTAAAC   | 180    |
|       |        |                                                               |        |
| Sbjct | 939908 | ACGTTTCCGGAAGAAGTTTTCGGTTTCCGAATTTAACCAAGTTGGATCTTCGTTTAAAC   | 939967 |
| Query | 181    | AGTTTGACTTTTCTTCCGGAATTTATCGGAGAATGTAAACGCCTTGAACAACCTTAATCTT | 240    |
|       |        |                                                               |        |
| Sbjct | 939968 | AGTTTGACTTTTCTTCCGGAATTTATCGGAGAATGTAAACGCCTTGAACAACCTTAATCTT | 940027 |
| Query | 241    | TTCGGGAACGACCTTACAACATTTCCGTCTACGTTTCTAAATTAAAAAATCTGAAAGTG   | 300    |
|       |        |                                                               |        |
| Sbjct | 940028 | TTCGGGAACGATCTTACAACATTTCCGTCTACGTTTCTAAATTAAAAAATCTGAAAGTG   | 940087 |
| Query | 301    | TTACTGGCGGGAAATAACGATTTTACGATTCTACCCTCCGAACCTTTGTTTCTTCCGTTG  | 360    |
|       |        |                                                               |        |
| Sbjct | 940088 | TTACTGGCGGGAAATAACGATTTTACGATTCTACCCTCCGAACCTTTGTTTCTTCCGTTG  | 940147 |
| Query | 361    | ATCAAAATTCTATACGTAGATCGGAATAAATTAACCTAACGGAACGGATGTGGAAATT    | 420    |
|       |        |                                                               |        |
| Sbjct | 940148 | ATCAAAATTTTATACGTAGATCGGAATAAATTAACCTAACGGAACGGATGTGGAAATT    | 940207 |
| Query | 421    | CTCGCTTCTCTTCTCCTTGGAGGAATTGGATCTGAGTCTGAATTCGGGGATTAAGGCG    | 480    |
|       |        |                                                               |        |
| Sbjct | 940208 | CTCGCTTCTCTTCTCCTTGGAGGAATTGGATCTGAGTCTGAATTCGGGGATTAAGGCG    | 940267 |
| Query | 481    | CTCCCTTTTAATTACGAAAACTTGTAATCTCATTAATCTAAAAAGATTGAATATTaaa    | 540    |
|       |        |                                                               |        |
| Sbjct | 940268 | CTCCCTTTTAATTACGAAAACTTGTAATCTCATTAATCTAAAAAGATTGAATATTAAA    | 940327 |
| Query | 541    | aaaaCTTCATTAAAGGGAGAGGATGCAGATAAATTGCAGGCGATTCTTCCAAATACCAAA  | 600    |
|       |        |                                                               |        |
| Sbjct | 940328 | AAACTTCATTAAAGGGAGAGGATGCAGATAAATTGCAGGCGATTCTTCCAAACACCAAA   | 940387 |
| Query | 601    | ATCGACTACTGA 612                                              |        |
|       |        |                                                               |        |
| Sbjct | 940388 | ATCGACTACTGA 940399                                           |        |

>Leptospira borgpetersenii strain FMAS\_AP3 chromosome 1, complete sequence  
Sequence ID: CP072628.1 Length: 3595898  
Range 1: 939787 to 940398

Score:1114 bits(603), Expect:0.0,  
Identities:609/612(99%), Gaps:0/612(0%), Strand: Plus/Plus

|       |        |                                                              |        |
|-------|--------|--------------------------------------------------------------|--------|
| Query | 1      | GGCTTCGTTTGTCTTACTGCGAGTTTCGACTGTAAAAAGAATGCGGAAGAGATTTTGGGA | 60     |
|       |        |                                                              |        |
| Sbjct | 939787 | GGCTTCGTTTGTCTTACTGCGAGTTTCGACTGTAAAAAGAATGCGGAAGAGATTTTGGGA | 939846 |
| Query | 61     | GAGGCAAAGGCAAAACCGGAATTGGTTCAAACCTTGGATTTTGAATGCAGAAGTTGTCC  | 120    |



|       |        |                                                                 |        |
|-------|--------|-----------------------------------------------------------------|--------|
| Sbjct | 939847 | <br>GAGGCAAAGGCAAACCGGAATTGGTTCAAACCTTTGGATTTTGAATGCAGAAGTTGTCC | 939906 |
| Query | 121    | ACGGTTCCGGAAGAAGTTTGC GGTTTTCCGAATTTAACCAAGTTGGATCTTCGTTTAAAC   | 180    |
| Sbjct | 939907 | ACGGTTCCGGAAGAAGTTTGC GGTTTTCCGAATTTAACCAAGTTGGATCTTCGTTTAAAC   | 939966 |
| Query | 181    | AGTTTGACTTTTCTTCCGGAATTTATCGGAGAATGTAAACGCCTTGAACAACCTTAATCTT   | 240    |
| Sbjct | 939967 | AGTTTGACTTTTCTTCCGGAATTTATCGGAGAATGTAAACGCCTTGAACAACCTTAATCTT   | 940026 |
| Query | 241    | TTCGGGAACGACCTTACAACATTTCCGTCTACGTTTTCTAAATTAAAAAATCTGAAAGTG    | 300    |
| Sbjct | 940027 | TTCGGGAACGATCTTACAACATTTCCGTCTACGTTTTCTAAATTAAAAAATCTGAAAGTG    | 940086 |
| Query | 301    | TTACTGGCGGGAAATAACGATTTTACGATTCTACCCTCCGAACCTTTGTTTCTTCCGTTG    | 360    |
| Sbjct | 940087 | TTACTGGCGGGAAATAACGATTTTACGATTCTACCCTCCGAACCTTTGTTTCTTCCGTTG    | 940146 |
| Query | 361    | ATCAAAATTCTATACGTAGATCGGAATAAATTAACCTAACGGAAACGGATGTGGAAATT     | 420    |
| Sbjct | 940147 | ATCAAAATTTTATACGTAGATCGGAATAAATTAACCTAACGGAAACGGATGTGGAAATT     | 940206 |
| Query | 421    | CTCGCTTCTCTTTCTCCTTGGAGGAATTGGATCTGAGTCTGAATTCGGGGATTAAGGCG     | 480    |
| Sbjct | 940207 | CTCGCTTCTCTTTCTCCTTGGAGGAATTGGATCTGAGTCTGAATTCGGGGATTAAGGCG     | 940266 |
| Query | 481    | CTCCCTTTTAATTACGAAAACTTGTAATCTCATTAATCTAAAAAGATTGAATATTaaa      | 540    |
| Sbjct | 940267 | CTCCCTTTTAATTACGAAAACTTGTAATCTCATTAATCTAAAAAGATTGAATATTAAA      | 940326 |
| Query | 541    | aaaaCTTCATTAAAGGGAGAGGATGCAGATAAATTGCAGGCGATTCTTCCAAATACCAAA    | 600    |
| Sbjct | 940327 | AAAACTTCATTAAAGGGAGAGGATGCAGATAAATTGCAGGCGATTCTTCCAAACACCAAA    | 940386 |
| Query | 601    | ATCGACTACTGA 612                                                |        |
| Sbjct | 940387 | ATCGACTACTGA 940398                                             |        |

>Leptospira borgpetersenii strain FMAS\_AP4 chromosome 1, complete sequence  
Sequence ID: CP072626.1 Length: 3595848  
Range 1: 939937 to 940548

Score:1114 bits(603), Expect:0.0,  
Identities:609/612(99%), Gaps:0/612(0%), Strand: Plus/Plus

|       |        |                                                                |        |
|-------|--------|----------------------------------------------------------------|--------|
| Query | 1      | GGCTTCGTTTGT TTTTACTGCGAGTTTCGACTGTAAAAAGAATGCGGAAGAGATTTTGGGA | 60     |
| Sbjct | 939937 | GGCTTCGTTTGT TTTTACTGCGAGTTTCGACTGTAAAAAGAATGCGGAAGAGATTTTGGGA | 939996 |
| Query | 61     | GAGGCAAAGGCAAACCGGAATTGGTTCAAACCTTTGGATTTTGAATGCAGAAGTTGTCC    | 120    |
| Sbjct | 939997 | GAGGCAAAGGCAAACCGGAATTGGTTCAAACCTTTGGATTTTGAATGCAGAAGTTGTCC    | 940056 |
| Query | 121    | ACGGTTCCGGAAGAAGTTTGC GGTTTTCCGAATTTAACCAAGTTGGATCTTCGTTTAAAC  | 180    |
| Sbjct | 940057 | ACGGTTCCGGAAGAAGTTTGC GGTTTTCCGAATTTAACCAAGTTGGATCTTCGTTTAAAC  | 940116 |
| Query | 181    | AGTTTGACTTTTCTTCCGGAATTTATCGGAGAATGTAAACGCCTTGAACAACCTTAATCTT  | 240    |

|       |        |                                                               |        |
|-------|--------|---------------------------------------------------------------|--------|
| Sbjct | 940117 | AGTTTGACTTTTCTTCCGGAATTTATCGGAGAATGTAAACGCCTTGAACAACCTTAATCTT | 940176 |
| Query | 241    | TTCGGGAACGACCTTACAACATTTCCGTCTACGTTTTCTAAATTAAAAAATCTGAAAGTG  | 300    |
|       |        |                                                               |        |
| Sbjct | 940177 | TTCGGGAACGATCTTACAACATTTCCGTCTACGTTTTCTAAATTAAAAAATCTGAAAGTG  | 940236 |
| Query | 301    | TTACTGGCGGGAAATAACGATTTTACGATTCTACCCTCCGAACTTTGTCTTCCGTTG     | 360    |
|       |        |                                                               |        |
| Sbjct | 940237 | TTACTGGCGGGAAATAACGATTTTACGATTCTACCCTCCGAACTTTGTCTTCCGTTG     | 940296 |
| Query | 361    | ATCAAAATTCTATACGTAGATCGGAATAAATTAACCTAACGGAAACGGATGTGGAAATT   | 420    |
|       |        |                                                               |        |
| Sbjct | 940297 | ATCAAAATTTTATACGTAGATCGGAATAAATTAACCTAACGGAAACGGATGTGGAAATT   | 940356 |
| Query | 421    | CTCGCTTCTCTTTCTCCTTGGAGGAATTGGATCTGAGTCTGAATTCGGGGATTAAGGCG   | 480    |
|       |        |                                                               |        |
| Sbjct | 940357 | CTCGCTTCTCTTTCTCCTTGGAGGAATTGGATCTGAGTCTGAATTCGGGGATTAAGGCG   | 940416 |
| Query | 481    | CTCCCTTTTAATTACGAAAACTTGTAATCTCATTAATCTAAAAAGATTGAATATTaaa    | 540    |
|       |        |                                                               |        |
| Sbjct | 940417 | CTCCCTTTTAATTACGAAAACTTGTAATCTCATTAATCTAAAAAGATTGAATATTAAA    | 940476 |
| Query | 541    | aaaaCTTCATTAAAGGGAGAGGATGCAGATAAATTGCAGGCGATTCTTCCAAATACCAAA  | 600    |
|       |        |                                                               |        |
| Sbjct | 940477 | AAACTTCATTAAAGGGAGAGGATGCAGATAAATTGCAGGCGATTCTTCCAAACACCAAA   | 940536 |
| Query | 601    | ATCGACTACTGA 612                                              |        |
|       |        |                                                               |        |
| Sbjct | 940537 | ATCGACTACTGA 940548                                           |        |

>Leptospira borgpetersenii strain FMAS\_PN1 chromosome 1, complete sequence  
Sequence ID: CP072624.1 Length: 3596207  
Range 1: 940706 to 941317

Score:1114 bits(603), Expect:0.0,  
Identities:609/612(99%), Gaps:0/612(0%), Strand: Plus/Plus

|       |        |                                                               |        |
|-------|--------|---------------------------------------------------------------|--------|
| Query | 1      | GGCTTCGTTTGTCTTACTGCGAGTTTCGACTGTAAAAAGAATGCGGAAGAGATTTTGGGA  | 60     |
|       |        |                                                               |        |
| Sbjct | 940706 | GGCTTCGTTTGTCTTACTGCGAGTTTCGACTGTAAAAAGAATGCGGAAGAGATTTTGGGA  | 940765 |
| Query | 61     | GAGGCAAAGGCAAAACCGGAATTGGTTCAAACCTTGGATTTTGAATGCAGAAGTTGTCC   | 120    |
|       |        |                                                               |        |
| Sbjct | 940766 | GAGGCAAAGGCAAAACCGGAATTGGTTCAAACCTTGGATTTTGAATGCAGAAGTTGTCC   | 940825 |
| Query | 121    | ACGGTTCCGGAAGAAGTTTGC GGTTTTCCGAATTTAACCAAGTTGGATCTTCGTTTAAAC | 180    |
|       |        |                                                               |        |
| Sbjct | 940826 | ACGGTTCCGGAAGAAGTTTGC GGTTTTCCGAATTTAACCAAGTTGGATCTTCGTTTAAAC | 940885 |
| Query | 181    | AGTTTGACTTTTCTTCCGGAATTTATCGGAGAATGTAAACGCCTTGAACAACCTTAATCTT | 240    |
|       |        |                                                               |        |
| Sbjct | 940886 | AGTTTGACTTTTCTTCCGGAATTTATCGGAGAATGTAAACGCCTTGAACAACCTTAATCTT | 940945 |
| Query | 241    | TTCGGGAACGACCTTACAACATTTCCGTCTACGTTTTCTAAATTAAAAAATCTGAAAGTG  | 300    |
|       |        |                                                               |        |
| Sbjct | 940946 | TTCGGGAACGATCTTACAACATTTCCGTCTACGTTTTCTAAATTAAAAAATCTGAAAGTG  | 941005 |
| Query | 301    | TTACTGGCGGGAAATAACGATTTTACGATTCTACCCTCCGAACTTTGTCTTCCGTTG     | 360    |
|       |        |                                                               |        |
| Sbjct | 941006 | TTACTGGCGGGAAATAACGATTTTACGATTCTACCCTCCGAACTTTGTCTTCCGTTG     | 941065 |

|       |        |                                                              |        |
|-------|--------|--------------------------------------------------------------|--------|
| Query | 361    | ATCAAAATTCTATACGTAGATCGGAATAAATTA                            | 420    |
|       |        |                                                              |        |
| Sbjct | 941066 | ATCAAAATTTTATACGTAGATCGGAATAAATTA                            | 941125 |
| Query | 421    | CTCGCTTCTCTTTCTCCTTGGAGGAATTGGATCTGAGTCTGAATTCGGGGATTAAGGCG  | 480    |
|       |        |                                                              |        |
| Sbjct | 941126 | CTCGCTTCTCTTTCTCCTTGGAGGAATTGGATCTGAGTCTGAATTCGGGGATTAAGGCG  | 941185 |
| Query | 481    | CTCCCTTTTAATTACGAAAACTTGTAATCTCATTAACTCTAAAAAGATTGAATATTaaa  | 540    |
|       |        |                                                              |        |
| Sbjct | 941186 | CTCCCTTTTAATTACGAAAACTTGTAATCTCATTAACTCTAAAAAGATTGAATATTAAA  | 941245 |
| Query | 541    | aaaaCTTCATTAAAGGGAGAGGATGCAGATAAATTGCAGGCGATTCTTCCAAATACCAAA | 600    |
|       |        |                                                              |        |
| Sbjct | 941246 | AAACTTCATTAAAGGGAGAGGATGCAGATAAATTGCAGGCGATTCTTCCAAACACCAAA  | 941305 |
| Query | 601    | ATCGACTACTGA 612                                             |        |
|       |        |                                                              |        |
| Sbjct | 941306 | ATCGACTACTGA 941317                                          |        |

>Leptospira borgpetersenii strain FMAS\_PN4 chromosome 1, complete sequence  
Sequence ID: CP072622.1 Length: 3595796  
Range 1: 940221 to 940832

Score:1114 bits(603), Expect:0.0,  
Identities:609/612(99%), Gaps:0/612(0%), Strand: Plus/Plus

|       |        |                                                                |        |
|-------|--------|----------------------------------------------------------------|--------|
| Query | 1      | GGCTTCGTTTGTGTTTACTGCGAGTTTCGACTGTAAAAAGAATGCGGAAGAGATTTTGGGA  | 60     |
|       |        |                                                                |        |
| Sbjct | 940221 | GGCTTCGTTTGTGTTTACTGCGAGTTTCGACTGTAAAAAGAATGCGGAAGAGATTTTGGGA  | 940280 |
| Query | 61     | GAGGCAAAGGCAAAACCGGAATTGGTTCAAACCTTTGGATTTTGGGAATGCAGAAGTTGTCC | 120    |
|       |        |                                                                |        |
| Sbjct | 940281 | GAGGCAAAGGCAAAACCGGAATTGGTTCAAACCTTTGGATTTTGGGAATGCAGAAGTTGTCC | 940340 |
| Query | 121    | ACGGTTCCGGAAGAAGTTTGCGGTTTTCCGAATTTAACCAAGTTGGATCTTCGTTTAAAC   | 180    |
|       |        |                                                                |        |
| Sbjct | 940341 | ACGGTTCCGGAAGAAGTTTGCGGTTTTCCGAATTTAACCAAGTTGGATCTTCGTTTAAAC   | 940400 |
| Query | 181    | AGTTTGACTTTTCTTCCGGAATTTATCGGAGAATGTAAACGCCTTGAACAACCTTAATCTT  | 240    |
|       |        |                                                                |        |
| Sbjct | 940401 | AGTTTGACTTTTCTTCCGGAATTTATCGGAGAATGTAAACGCCTTGAACAACCTTAATCTT  | 940460 |
| Query | 241    | TTCGGAACGACCTTACAACATTTCCGTCTACGTTTTCTAAATTAAAAAATCTGAAAGTG    | 300    |
|       |        |                                                                |        |
| Sbjct | 940461 | TTCGGAACGATCTTACAACATTTCCGTCTACGTTTTCTAAATTAAAAAATCTGAAAGTG    | 940520 |
| Query | 301    | TTACTGGCGGGAAATAACGATTTTACGATTCTACCCTCCGAACCTTTTGTCTTCCGTTG    | 360    |
|       |        |                                                                |        |
| Sbjct | 940521 | TTACTGGCGGGAAATAACGATTTTACGATTCTACCCTCCGAACCTTTTGTCTTCCGTTG    | 940580 |
| Query | 361    | ATCAAAATTCTATACGTAGATCGGAATAAATTA                              | 420    |
|       |        |                                                                |        |
| Sbjct | 940581 | ATCAAAATTTTATACGTAGATCGGAATAAATTA                              | 940640 |
| Query | 421    | CTCGCTTCTCTTTCTCCTTGGAGGAATTGGATCTGAGTCTGAATTCGGGGATTAAGGCG    | 480    |
|       |        |                                                                |        |
| Sbjct | 940641 | CTCGCTTCTCTTTCTCCTTGGAGGAATTGGATCTGAGTCTGAATTCGGGGATTAAGGCG    | 940700 |

|       |        |                                                              |        |
|-------|--------|--------------------------------------------------------------|--------|
| Query | 481    | CTCCCTTTTAAATTACGAAAACTTGTAATCTCATTAAATCTAAAAAGATTGAATATTaaa | 540    |
|       |        |                                                              |        |
| Sbjct | 940701 | CTCCCTTTTAAATTACGAAAACTTGTAATCTCATTAAATCTAAAAAGATTGAATATTAAA | 940760 |
| Query | 541    | aaaaCTTCATTAAAGGGAGAGGATGCAGATAAATTGCAGGCGATTCTTCCAAATACCAAA | 600    |
|       |        |                                                              |        |
| Sbjct | 940761 | AAACTTCATTAAAGGGAGAGGATGCAGATAAATTGCAGGCGATTCTTCCAAACACCAAA  | 940820 |
| Query | 601    | ATCGACTACTGA 612                                             |        |
|       |        |                                                              |        |
| Sbjct | 940821 | ATCGACTACTGA 940832                                          |        |

>Leptospira borgpetersenii strain FMAS\_AP8 chromosome 1, complete sequence  
Sequence ID: CP072620.1 Length: 3595870  
Range 1: 939788 to 940399

Score:1114 bits(603), Expect:0.0,  
Identities:609/612(99%), Gaps:0/612(0%), Strand: Plus/Plus

|       |        |                                                                |        |
|-------|--------|----------------------------------------------------------------|--------|
| Query | 1      | GGCTTCGTTTGTCTTACTGCGAGTTTCGACTGTAAAAAGAATGCGGAAGAGATTTTGGGA   | 60     |
|       |        |                                                                |        |
| Sbjct | 939788 | GGCTTCGTTTGTCTTACTGCGAGTTTCGACTGTAAAAAGAATGCGGAAGAGATTTTGGGA   | 939847 |
| Query | 61     | GAGGCAAAGGCAAAACCGGAATTGGTTCAAACCTTGGATTTTGAATGCAGAAGTTGTCC    | 120    |
|       |        |                                                                |        |
| Sbjct | 939848 | GAGGCAAAGGCAAAACCGGAATTGGTTCAAACCTTGGATTTTGAATGCAGAAGTTGTCC    | 939907 |
| Query | 121    | ACGTTTCCGGAAGAAGTTTTCGGTTCCTTCCGAATTTAACCAAGTTGGATCTTCGTTTAAAC | 180    |
|       |        |                                                                |        |
| Sbjct | 939908 | ACGTTTCCGGAAGAAGTTTTCGGTTCCTTCCGAATTTAACCAAGTTGGATCTTCGTTTAAAC | 939967 |
| Query | 181    | AGTTTGACTTTTCTTCCGGAATTTATCGGAGAATGTAAACGCCTTGAACAACCTTAATCTT  | 240    |
|       |        |                                                                |        |
| Sbjct | 939968 | AGTTTGACTTTTCTTCCGGAATTTATCGGAGAATGTAAACGCCTTGAACAACCTTAATCTT  | 940027 |
| Query | 241    | TTCGGGAACGACCTTACAACATTTCCGTCTACGTTTTCTAAATTAAAAAATCTGAAAGTG   | 300    |
|       |        |                                                                |        |
| Sbjct | 940028 | TTCGGGAACGATCTTACAACATTTCCGTCTACGTTTTCTAAATTAAAAAATCTGAAAGTG   | 940087 |
| Query | 301    | TTACTGGCGGGAAATAACGATTTTACGATTCTACCCTCCGAACCTTTGTTTCTTCCGTTG   | 360    |
|       |        |                                                                |        |
| Sbjct | 940088 | TTACTGGCGGGAAATAACGATTTTACGATTCTACCCTCCGAACCTTTGTTTCTTCCGTTG   | 940147 |
| Query | 361    | ATCAAAATTCTATACGTAGATCGGAATAAATTAACCTAACGGAACGGATGTGGAAATT     | 420    |
|       |        |                                                                |        |
| Sbjct | 940148 | ATCAAAATTTTATACGTAGATCGGAATAAATTAACCTAACGGAACGGATGTGGAAATT     | 940207 |
| Query | 421    | CTCGCTTCTCTTTCTCCTTGGAGGAATTGGATCTGAGTCTGAATTCGGGGATTAAGGCG    | 480    |
|       |        |                                                                |        |
| Sbjct | 940208 | CTCGCTTCTCTTTCTCCTTGGAGGAATTGGATCTGAGTCTGAATTCGGGGATTAAGGCG    | 940267 |
| Query | 481    | CTCCCTTTTAAATTACGAAAACTTGTAATCTCATTAAATCTAAAAAGATTGAATATTaaa   | 540    |
|       |        |                                                                |        |
| Sbjct | 940268 | CTCCCTTTTAAATTACGAAAACTTGTAATCTCATTAAATCTAAAAAGATTGAATATTAAA   | 940327 |
| Query | 541    | aaaaCTTCATTAAAGGGAGAGGATGCAGATAAATTGCAGGCGATTCTTCCAAATACCAAA   | 600    |
|       |        |                                                                |        |
| Sbjct | 940328 | AAACTTCATTAAAGGGAGAGGATGCAGATAAATTGCAGGCGATTCTTCCAAACACCAAA    | 940387 |
| Query | 601    | ATCGACTACTGA 612                                               |        |

Sbjct 940388 ||||| ATCGACTACTGA 940399

>Leptospira borgpetersenii strain FMAS\_AP9 chromosome 1, complete sequence  
Sequence ID: CP072618.1 Length: 3595582  
Range 1: 2369403 to 2370014

Score:1114 bits(603), Expect:0.0,  
Identities:609/612(99%), Gaps:0/612(0%), Strand: Plus/Minus

|       |         |                                                              |         |
|-------|---------|--------------------------------------------------------------|---------|
| Query | 1       | GGCTTCGTTTGTCTTTACTGCGAGTTTCGACTGTAAAAAGAATGCGGAAGAGATTTTGGA | 60      |
|       |         |                                                              |         |
| Sbjct | 2370014 | GGCTTCGTTTGTCTTTACTGCGAGTTTCGACTGTAAAAAGAATGCGGAAGAGATTTTGGA | 2369955 |
| Query | 61      | GAGGCAAAGGCAAACCGGAATTGGTTCAAACCTTTGGATTTTGAATGCAGAAGTTGTCC  | 120     |
|       |         |                                                              |         |
| Sbjct | 2369954 | GAGGCAAAGGCAAACCGGAATTGGTTCAAACCTTTGGATTTTGAATGCAGAAGTTGTCC  | 2369895 |
| Query | 121     | ACGGTTCGGAAGAAGTTTTCGGTTTTCCGAATTTAACCAAGTTGGATCTTCGTTTAAAC  | 180     |
|       |         |                                                              |         |
| Sbjct | 2369894 | ACGGTTCGGAAGAAGTTTTCGGTTTTCCGAATTTAACCAAGTTGGATCTTCGTTTAAAC  | 2369835 |
| Query | 181     | AGTTTGACTTTTCTTCCGGAATTTATCGGAGAATGTAAACGCCTTGAACAACTTAATCTT | 240     |
|       |         |                                                              |         |
| Sbjct | 2369834 | AGTTTGACTTTTCTTCCGGAATTTATCGGAGAATGTAAACGCCTTGAACAACTTAATCTT | 2369775 |
| Query | 241     | TTCGGAACGACCTTACAACATTTCCGTCTACGTTTTCTAAATTAAAAATCTGAAAGTG   | 300     |
|       |         |                                                              |         |
| Sbjct | 2369774 | TTCGGAACGATCTTACAACATTTCCGTCTACGTTTTCTAAATTAAAAATCTGAAAGTG   | 2369715 |
| Query | 301     | TTACTGGCGGGAAATAACGATTTTACGATTCTACCCTCCGAACCTTTGTTTCTTCCGTTG | 360     |
|       |         |                                                              |         |
| Sbjct | 2369714 | TTACTGGCGGGAAATAACGATTTTACGATTCTACCCTCCGAACCTTTGTTTCTTCCGTTG | 2369655 |
| Query | 361     | ATCAAAATTCTATACGTAGATCGGAATAAATTAACCTCTAACGGAACGGATGTGGAAATT | 420     |
|       |         |                                                              |         |
| Sbjct | 2369654 | ATCAAAATTTTATACGTAGATCGGAATAAATTAACCTCTAACGGAACGGATGTGGAAATT | 2369595 |
| Query | 421     | CTCGCTTCTCTTTCCTCCTTGAGGAATTGGATCTGAGTCTGAATTCGGGGATTAAGGCG  | 480     |
|       |         |                                                              |         |
| Sbjct | 2369594 | CTCGCTTCTCTTTCCTCCTTGAGGAATTGGATCTGAGTCTGAATTCGGGGATTAAGGCG  | 2369535 |
| Query | 481     | CTCCCTTTTAATTACGAAAACTTGTAATCTCATTAACTCTAAAAAGATTGAATATTaaa  | 540     |
|       |         |                                                              |         |
| Sbjct | 2369534 | CTCCCTTTTAATTACGAAAACTTGTAATCTCATTAACTCTAAAAAGATTGAATATTAAA  | 2369475 |
| Query | 541     | aaaaCTTCATTAAAGGGAGAGGATGCAGATAAATTGCAGGCGATTCTTCCAAATACCAA  | 600     |
|       |         |                                                              |         |
| Sbjct | 2369474 | AAAACCTTCATTAAAGGGAGAGGATGCAGATAAATTGCAGGCGATTCTTCCAAACACCAA | 2369415 |
| Query | 601     | ATCGACTACTGA 612                                             |         |
|       |         |                                                              |         |
| Sbjct | 2369414 | ATCGACTACTGA 2369403                                         |         |

>Leptospira borgpetersenii serovar Javanica leucine-rich repeat protein (LRR) gene,  
partial cds  
Sequence ID: JX522457.1 Length: 612

Range 1: 1 to 612

Score:1114 bits(603), Expect:0.0,  
Identities:609/612(99%), Gaps:0/612(0%), Strand: Plus/Plus

```
Query 1      GGCTTCGTTTGTCTTACTGCGAGTTTCGACTGTAAAAAGAATGCGGAAGAGATTTTGGGA 60
          |||||  |||||  |||||  |||||  |||||  |||||  |||||  |||||  |||||  |||||
Sbjct 1      GGCTTCCTTTGTCTTACTGCGAGTTTCGACTGTAAAAAGAATGCGGAAGAGATTTTGGGA 60

Query 61     GAGGCAAAGGCAAACCGGAATTGGTTCAAACTTTGGATTTTGAATGCAGAAGTTGTCC 120
          |||||  |||||  |||||  |||||  |||||  |||||  |||||  |||||  |||||  |||||
Sbjct 61     GAGGCAAAGGCAAACCGGAATTGGTTCAAACTTTGGATTTTGAATGCAGAAGTTGTCC 120

Query 121    ACGGTTCCGGAAGAAGTTTGCGGTTTTCCGAATTTAACCAAGTTGGATCTTCGTTTAAAC 180
          |||||  |||||  |||||  |||||  |||||  |||||  |||||  |||||  |||||  |||||
Sbjct 121    ACGGTTCCGGAAGAAGTTTGCGGTTTTCCGAATTTAACCAAGTTGGATCTTCGTTTAAAC 180

Query 181    AGTTTGACTTTTCTTCCGGAATTTATCGGAGAATGTAAACGCCTTGAACAACCTTAATCTT 240
          |||||  |||||  |||||  |||||  |||||  |||||  |||||  |||||  |||||  |||||
Sbjct 181    AGTTTGACTTTTCTTCCGGAATTTATCGGAGAATGTAAACGCCTTGAACAACCTTAATCTT 240

Query 241    TTCGGAACGACCTTACAACATTTCCGTCTACGTTTTCTAAATTAAAAAATCTGAAAGTG 300
          |||||  |||||  |||||  |||||  |||||  |||||  |||||  |||||  |||||  |||||
Sbjct 241    TTCGGAACGACCTTACAACATTTCCGTCTACGTTTTCTAAATTAAAAAATCTGAAAGTG 300

Query 301    TTACTGGCGGGAAATAACGATTTTACGATTCTACCCTCCGAACCTTTGTTTCTTCCGTTG 360
          |||||  |||||  |||||  |||||  |||||  |||||  |||||  |||||  |||||  |||||
Sbjct 301    TTACTGGCGGGAAATAACGATTTTACGATTCTACCCTCCGAACCTTTGTTTCTTCCGTTG 360

Query 361    ATCAAAATTCTATACGTAGATCGGAATAAATTAACCTCTAACGGAACGGATGTGGAAATT 420
          |||||  |||||  |||||  |||||  |||||  |||||  |||||  |||||  |||||  |||||
Sbjct 361    ATCAAAATTCTATACGTAGATCGGAATAAATTAACCTCTAACGGAACGGATGTGGAAATT 420

Query 421    CTCGCTTCTCTTTCCTCCTTGGAGGAATTGGATCTGAGTCTGAATTCGGGGATTAAGGCG 480
          |||||  |||||  |||||  |||||  |||||  |||||  |||||  |||||  |||||  |||||
Sbjct 421    CTCGCTTCTCTTTCCTCCTTGGAGGAATTGGATCTGAGTCTGAATTCGGGGATTAAGGCG 480

Query 481    CTCCCTTTTAATTACGAAAACTTGTAATCTCATTAAATCTAAAAAGATTGAATATTaaa 540
          |||||  |||||  |||||  |||||  |||||  |||||  |||||  |||||  |||||  |||||
Sbjct 481    CTCCCTTTTAATTACGAAAACTTGTAATCTCATTAAATTTAAAAAGATTGAATATTAAA 540

Query 541    aaaaCTTCATTAAAGGGAGAGGATGCAGATAAATTGCAGGCGATTCTTCAAATACCAA 600
          |||||  |||||  |||||  |||||  |||||  |||||  |||||  |||||  |||||  |||||
Sbjct 541    AAAAATTTCATTAAAGGGAGAGGATGCAGATAAATTGCAGGCGATTCTTCGAAATACCAA 600

Query 601    ATCGACTACTGA 612
          |||||  |||||  |||||  |||||  |||||  |||||  |||||  |||||  |||||  |||||
Sbjct 601    ATCGACTACTGA 612
```

>Leptospira borgpetersenii serovar Hardjo strain NVSL S 818 chromosome 1  
Sequence ID: CP015052.1 Length: 3584464  
Range 1: 2714429 to 2715040

Score:1070 bits(579), Expect:0.0,  
Identities:601/612(98%), Gaps:0/612(0%), Strand: Plus/Minus

```
Query 1      GGCTTCGTTTGTCTTACTGCGAGTTTCGACTGTAAAAAGAATGCGGAAGAGATTTTGGGA 60
          |||||  |||||  |||||  |||||  |||||  |||||  |||||  |||||  |||||  |||||
Sbjct 2715040 GGCTTCGTTTGTCTTACTGCGAGTTTCAACTGTAAAAAGAATGCGGAAGAGATTTTGGGA 2714981
```

|       |         |                                                               |         |
|-------|---------|---------------------------------------------------------------|---------|
| Query | 61      | GAGGCAAAGGCAAACCGGAATTGGTTCAAACTTTGGATTTTGAATGCAGAAGTTGTCC    | 120     |
|       |         |                                                               |         |
| Sbjct | 2714980 | GAGGCAAAGGCAAACCGGAATTGGTTCAAACTTTGGATTTTGAATGCAGAAGTTGTCC    | 2714921 |
| Query | 121     | ACGGTTCCGGAAGAAGTTTGCGGTTTTCCGAATTTAACCAAGTTGGATCTTCGTTTAAAC  | 180     |
|       |         |                                                               |         |
| Sbjct | 2714920 | ACGGTTCCGGAAGGAGTTTGCGGTTTTCCGAATTTAACCAAGTTGGATCTTCGTTTAAAC  | 2714861 |
| Query | 181     | AGTTTGACTTTTCTTCCGGAATTTATCGGAGAATGTAAACGCCTTGAACAACTTAATCTT  | 240     |
|       |         |                                                               |         |
| Sbjct | 2714860 | AGTTTGACTTTTCTTCCGGAATTTATCGGAGAATGTAAACGCCTTGAACAACTTAATCTT  | 2714801 |
| Query | 241     | TTCGGGAACGACCTTACAACATTTCCGTCTACGTTTTCTAAATTAAAAAATCTGAAAGTG  | 300     |
|       |         |                                                               |         |
| Sbjct | 2714800 | TTCGGGAACGACCTTACGACATTTCCGTCTACGTTTTCTAAATTAAAAAATCTGAAAGTG  | 2714741 |
| Query | 301     | TTACTGGCGGGAAATAACGATTTTACGATTCTACCCTCCGAACTTTTGTTTCTTCCGTTG  | 360     |
|       |         |                                                               |         |
| Sbjct | 2714740 | TTACTGGCGGGAAATAACGATTTTACGATTCTACCCTCCGAACTTTTGTTTCTTCCATTG  | 2714681 |
| Query | 361     | ATCAAAATTCTATACGTAGATCGGAATAAATTAACCTCTAACCGAAACGGATGTGGAAATT | 420     |
|       |         |                                                               |         |
| Sbjct | 2714680 | ATCAAAATTTTATACGTAGATCGGAATAAATTAATTCTAACCGAAACGGATGTGGAAATT  | 2714621 |
| Query | 421     | CTCGCTTCTCTTTCCTCCTTGGAGGAATTGGATCTGAGTCTGAATTCGGGGATTAAGGCG  | 480     |
|       |         |                                                               |         |
| Sbjct | 2714620 | CTCGCTTCTCTTTCCTCCTTGGAGGAATTGGATCTGAGTCTGAATTCGGGGATTAAGGCG  | 2714561 |
| Query | 481     | CTCCCTTTTAATTACGAAAACTTGTAATCTCATTAAATCTAAAAAGATTGAATATTaaa   | 540     |
|       |         |                                                               |         |
| Sbjct | 2714560 | CTTCCTTTTAATTACGAAAACTTGTAATCTCATTAAATTTAAAAAGATTGAATATTAAA   | 2714501 |
| Query | 541     | aaaaCTTCATTAAAGGGAGAGGATGCAGATAAATTGCAGGCGATTCTTCCAAATACCAA   | 600     |
|       |         |                                                               |         |
| Sbjct | 2714500 | AAAACATCATTAAAGGGAGAGGATGCAGATAAATTGCAGGCGATTCTTCCAAATACCAA   | 2714441 |
| Query | 601     | ATCGACTACTGA 612                                              |         |
|       |         |                                                               |         |
| Sbjct | 2714440 | ATCGACTACTGA 2714429                                          |         |

>Leptospira borgpetersenii serovar Hardjo-bovis JB197 chromosome 1, complete sequence  
Sequence ID: CP000350.1 Length: 3576473  
Range 1: 2702099 to 2702710

Score:1070 bits(579), Expect:0.0,  
Identities:601/612(98%), Gaps:0/612(0%), Strand: Plus/Minus

|       |         |                                                              |         |
|-------|---------|--------------------------------------------------------------|---------|
| Query | 1       | GGCTTCGTTTGTTTTACTGCGAGTTTCGACTGTAAAAAGAATGCGGAAGAGATTTTGGGA | 60      |
|       |         |                                                              |         |
| Sbjct | 2702710 | GGCTTCGTTTGTTTTACTGCGAGTTTCAACTGTAAAAAGAATGCGGAAGAGATTTTGGGA | 2702651 |
| Query | 61      | GAGGCAAAGGCAAACCGGAATTGGTTCAAACTTTGGATTTTGAATGCAGAAGTTGTCC   | 120     |
|       |         |                                                              |         |
| Sbjct | 2702650 | GAGGCAAAGGCAAACCGGAATTGGTTCAAACTTTGGATTTTGAATGCAGAAGTTGTCC   | 2702591 |
| Query | 121     | ACGGTTCCGGAAGAAGTTTGCGGTTTTCCGAATTTAACCAAGTTGGATCTTCGTTTAAAC | 180     |
|       |         |                                                              |         |
| Sbjct | 2702590 | ACGGTTCCGGAAGGAGTTTGCGGTTTTCCGAATTTAACCAAGTTGGATCTTCGTTTAAAC | 2702531 |
| Query | 181     | AGTTTGACTTTTCTTCCGGAATTTATCGGAGAATGTAAACGCCTTGAACAACTTAATCTT | 240     |

|       |         |                                                                  |         |
|-------|---------|------------------------------------------------------------------|---------|
| Sbjct | 2702530 | <br>AGTTTGACTTTTCTTCGGAATTTATCGGAGAATGTAAACGCCTTGAACAACCTTAATCTT | 2702471 |
| Query | 241     | TTCGGAACGACCTTACAACATTTCCGTCTACGTTTTCTAAATTAAAAAATCTGAAAGTG      | 300     |
| Sbjct | 2702470 | <br>TTCGGAACGACCTTACGACATTTCCGTCTACGTTTTCTAAATTAAAAAATCTGAAAGTG  | 2702411 |
| Query | 301     | TTACTGGCGGGAAATAACGATTTTACGATTCTACCCTCCGAACTTTTGTTTCTTCCGTTG     | 360     |
| Sbjct | 2702410 | <br>TTACTGGCGGGAAATAACGATTTTACGATTCTACCCTCCGAACTTTTGTTTCTTCCATTG | 2702351 |
| Query | 361     | ATCAAAATTCTATACGTAGATCGGAATAAATTAACCTCTAACGGAAACGGATGTGGAAATT    | 420     |
| Sbjct | 2702350 | <br>ATCAAAATTTTATACGTAGATCGGAATAAATTAATTCTAACGGAAACGGATGTGGAAATT | 2702291 |
| Query | 421     | CTCGCTTCTCTTTCTCTTGGAGGAATTGGATCTGAGTCTGAATTCGGGGATTAAGGCG       | 480     |
| Sbjct | 2702290 | <br>CTCGCTTCTCTTTCTCTTGGAGGAATTGGATCTGAGTCTGAATTCGGGGATTAAGGCG   | 2702231 |
| Query | 481     | CTCCCTTTTAATTACGAAAACTTGTAATCTCATTAACTCTAAAAAGATTGAATATTaaa      | 540     |
| Sbjct | 2702230 | <br>CTTCCTTTTAATTACGAAAACTTGTAATCTCATTAAATTTAAAAAGATTGAATATTAAA  | 2702171 |
| Query | 541     | aaaaCTTCATTAAAGGGAGAGGATGCAGATAAATTGCAGGCGATTCTTCCAAATACCAA      | 600     |
| Sbjct | 2702170 | <br>AAAACATCATTAAAGGGAGAGGATGCAGATAAATTGCAGGCGATTCTTCCAAATACCAA  | 2702111 |
| Query | 601     | ATCGACTACTGA 612<br>                                             |         |
| Sbjct | 2702110 | ATCGACTACTGA 2702099                                             |         |

>Leptospira borgpetersenii serovar Hardjo-bovis strain L49 chromosome 1, complete sequence  
Sequence ID: CP033440.1 Length: 3620710  
Range 1: 946028 to 946639

Score:1064 bits(576), Expect:0.0,  
Identities:600/612(98%), Gaps:0/612(0%), Strand: Plus/Plus

|       |        |                                                                   |        |
|-------|--------|-------------------------------------------------------------------|--------|
| Query | 1      | GGCTTCGTTTGTCTTACTGCGAGTTTCGACTGTAAAAAGAATGCGGAAGAGATTTGGGA       | 60     |
| Sbjct | 946028 | <br>GGCTTCGTTTGTCTTACTGCGAGTTTCAATTGTAAAAAGAATGCGGAAGAGATTTGGGA   | 946087 |
| Query | 61     | GAGGCAAAGGCAAAACCGGAATTGGTTCAAACCTTTGGATTTTGGAATGCAGAAGTTGTCC     | 120    |
| Sbjct | 946088 | <br>GAGGCAAAGGCAAAACCGGAATTGGTTCAAACCTTTGGATTTTGGAATGCAGAAGTTGTCC | 946147 |
| Query | 121    | ACGGTTCCGGAAGAAGTTTGCAGTTTCCGAATTTAACCAAGTTGGATCTTCGTTTAAAC       | 180    |
| Sbjct | 946148 | <br>ACGGTTCCGGAAGGAGTTTGCAGTTTCCGAATTTAACCAAGTTGGATCTTCGTTTAAAC   | 946207 |
| Query | 181    | AGTTTGACTTTTCTTCCGGAATTTATCGGAGAATGTAAACGCCTTGAACAACCTTAATCTT     | 240    |
| Sbjct | 946208 | <br>AGTTTGACTTTTCTTCCGGAATTTATCGGAGAATGTAAACGCCTTGAACAACCTTAATCTT | 946267 |
| Query | 241    | TTCGGAACGACCTTACAACATTTCCGTCTACGTTTTCTAAATTAAAAAATCTGAAAGTG       | 300    |
| Sbjct | 946268 | <br>TTCGGAACGACCTTACGACATTTCCGTCTACGTTTTCTAAATTAAAAAATCTGAAAGTG   | 946327 |
| Query | 301    | TTACTGGCGGGAAATAACGATTTTACGATTCTACCCTCCGAACTTTTGTTTCTTCCGTTG      | 360    |



|       |        |                                                                  |        |
|-------|--------|------------------------------------------------------------------|--------|
| Sbjct | 946328 | <br>TTACTGGCGGGAAATAACGATTTTACGATTCTACCTTCCGAACCTTTGTTTCTTCCATTG | 946387 |
| Query | 361    | ATCAAAATTCTATACGTAGATCGGAATAAATTAACCTAACGGAAACGGATGTGGAAATT      | 420    |
| Sbjct | 946388 | <br>ATCAAAATTTTATACGTAGATCGGAATAAATTAATTCTAACGGAAACGGATGTGGAAATT | 946447 |
| Query | 421    | CTCGCTTCTCTTTCTCCTTGGAGGAATTGGATCTGAGTCTGAATTCGGGGATTAAGGCG      | 480    |
| Sbjct | 946448 | <br>CTCGCTTCTCTTTCTCCTTGGAGGAATTGGATCTGAGTCTGAATTCGGGGATTAAGGCG  | 946507 |
| Query | 481    | CTCCCTTTTAATTACGAAAACTTGTAAATCTCATTAACTCTAAAAAGATTGAATATTaaa     | 540    |
| Sbjct | 946508 | <br>CTTCCTTTTAATTACGAAAACTTGTGAATCTCATTAAATTTAAAAAGATTGAATATTAAA | 946567 |
| Query | 541    | aaaaCTTCATTAAAGGGAGAGGATGCAGATAAATTGCAGGCGATTCTTCCAAATACCAAA     | 600    |
| Sbjct | 946568 | <br>AAAACATCATTAAAGGGAGAGGATGCAGATAAATTGCAGGCGATTCTTCCAAATACCAAA | 946627 |
| Query | 601    | ATCGACTACTGA 612                                                 |        |
| Sbjct | 946628 | <br>ATCGACTACTGA 946639                                          |        |

>Leptospira borgpetersenii serovar Hardjo-bovis strain 203 chromosome I, complete sequence  
Sequence ID: CP021412.1 Length: 3589981  
Range 1: 940162 to 940773

Score:1064 bits(576), Expect:0.0,  
Identities:600/612(98%), Gaps:0/612(0%), Strand: Plus/Plus

|       |        |                                                                    |        |
|-------|--------|--------------------------------------------------------------------|--------|
| Query | 1      | GGCTTCGTTTGTGTTTTACTGCGAGTTTCGACTGTAAAAAGAATGCGGAAGAGATTTTGGGA     | 60     |
| Sbjct | 940162 | <br>GGCTTCGTTTGTGTTTTACTGCGAGTTTCAATTGTAAAAAGAATGCGGAAGAGATTTTGGGA | 940221 |
| Query | 61     | GAGGCAAAGGCAAACCGGAATTGGTTCAAACCTTTGGATTTTGAATGCAGAAGTTGTCC        | 120    |
| Sbjct | 940222 | <br>GAGGCAAAGGCAAACCGGAATTGGTTCAAACCTTTGGATTTTGAATGCAGAAGTTGTCC    | 940281 |
| Query | 121    | ACGTTTCCGGAAGAAGTTTGCAGTTTTCGGAATTTAACCAAGTTGGATCTTCGTTTAAAC       | 180    |
| Sbjct | 940282 | <br>ACGTTTCCGGAAGGAGTTTGCAGTTTTCGGAATTTAACCAAGTTGGATCTTCGTTTAAAC   | 940341 |
| Query | 181    | AGTTTGACTTTTCTTCCGGAATTTATCGGAGAATGTAAACGCCTTGAACAACCTTAATCTT      | 240    |
| Sbjct | 940342 | <br>AGTTTGACTTTTCTTCCGGAATTTATCGGAGAATGTAAACGCCTTGAACAACCTTAATCTT  | 940401 |
| Query | 241    | TTCGGGAACGACCTTACAACATTTCCGTCTACGTTTTCTAAATTAAAAAATCTGAAAGTG       | 300    |
| Sbjct | 940402 | <br>TTCGGGAACGACCTTACGACATTTCCGTCTACGTTTTCTAAATTAAAAAATCTGAAAGTG   | 940461 |
| Query | 301    | TTACTGGCGGGAAATAACGATTTTACGATTCTACCCTCCGAACCTTTGTTTCTTCCGTTG       | 360    |
| Sbjct | 940462 | <br>TTACTGGCGGGAAATAACGATTTTACGATTCTACCTTCCGAACCTTTGTTTCTTCCATTG   | 940521 |
| Query | 361    | ATCAAAATTCTATACGTAGATCGGAATAAATTAACCTAACGGAAACGGATGTGGAAATT        | 420    |
| Sbjct | 940522 | <br>ATCAAAATTTTATACGTAGATCGGAATAAATTAATTCTAACGGAAACGGATGTGGAAATT   | 940581 |
| Query | 421    | CTCGCTTCTCTTTCTCCTTGGAGGAATTGGATCTGAGTCTGAATTCGGGGATTAAGGCG        | 480    |

|       |        |                                                                  |        |
|-------|--------|------------------------------------------------------------------|--------|
| Sbjct | 940582 | <br>CTCGCTTCTCTTTCTCCTTGGAGGAATTGGATCTGAGTCTGAATTCGGGGATTAAGGCG  | 940641 |
| Query | 481    | CTCCCTTTTAATTACGAAAACTTGTAATCTCATTAATCTAAAAAGATTGAATATTaaa       | 540    |
| Sbjct | 940642 | <br>CTTCCTTTTAATTACGAAAACTTGTAATCTCATTAATTTAAAAAGATTGAATATTAAA   | 940701 |
| Query | 541    | aaaaCTTCATTAAAGGGAGAGGATGCAGATAAATTGCAGGCGATTCTTCCAAATACCAAA     | 600    |
| Sbjct | 940702 | <br>AAAACATCATTAAAGGGAGAGGATGCAGATAAATTGCAGGCGATTCTTCCAAATACCAAA | 940761 |
| Query | 601    | ATCGACTACTGA 612                                                 |        |
| Sbjct | 940762 | <br>ATCGACTACTGA 940773                                          |        |

>Leptospira borgpetersenii serovar Hardjo strain NVSL S 1343 chromosome 1  
Sequence ID: CP015050.1 Length: 3613654  
Range 1: 978860 to 979471

Score:1064 bits(576), Expect:0.0,  
Identities:600/612(98%), Gaps:0/612(0%), Strand: Plus/Plus

|       |        |                                                                   |        |
|-------|--------|-------------------------------------------------------------------|--------|
| Query | 1      | GGCTTCGTTTGTCTTACTGCGAGTTTCGACTGTAAAAAGAATGCGGAAGAGATTTTGGGA      | 60     |
| Sbjct | 978860 | <br>GGCTTCGTTTGTCTTACTGCGAGTTTCAATTGTAAAAAGAATGCGGAAGAGATTTTGGGA  | 978919 |
| Query | 61     | GAGGCAAAGGCAAAACCGGAATTGGTTCAAACCTTTGGATTTTGAATGCAGAAGTTGTCC      | 120    |
| Sbjct | 978920 | <br>GAGGCAAAGGCAAAACCGGAATTGGTTCAAACCTTTGGATTTTGAATGCAGAAGTTGTCC  | 978979 |
| Query | 121    | ACGGTTCCGGAAGAAGTTTGC GGTTTTCCGAATTTAACCAAGTTGGATCTTCGTTTAAAC     | 180    |
| Sbjct | 978980 | <br>ACGGTTCCGGAAGGAGTTTGC GGTTTTCCGAATTTAACCAAGTTGGATCTTCGTTTAAAC | 979039 |
| Query | 181    | AGTTTGACTTTTCTTCCGGAATTTATCGGAGAATGTAAACGCCTTGAACAACCTTAATCTT     | 240    |
| Sbjct | 979040 | <br>AGTTTGACTTTTCTTCCGGAATTTATCGGAGAATGTAAACGCCTTGAACAACCTTAATCTT | 979099 |
| Query | 241    | TTCGGGAACGACCTTACAACATTTCCGTCTACGTTTTCTAAATTAAAAAATCTGAAAGTG      | 300    |
| Sbjct | 979100 | <br>TTCGGGAACGACCTTACAACATTTCCGTCTACGTTTTCTAAATTAAAAAATCTGAAAGTG  | 979159 |
| Query | 301    | TTACTGGCGGGAAATAACGATTTTACGATTCTACCCTCCGAACCTTTGTTTCTTCCGTTG      | 360    |
| Sbjct | 979160 | <br>TTACTGGCGGGAAATAACGATTTTACGATTCTACCCTCCGAACCTTTGTTTCTTCCATTG  | 979219 |
| Query | 361    | ATCAAAATTCTATACGTAGATCGGAATAAATTAACCTCTAACGGAAACGGATGTGGAAATT     | 420    |
| Sbjct | 979220 | <br>ATCAAAATTTTATACGTAGATCGGAATAAATTAATTCTAACGGAAACGGATGTGGAAATT  | 979279 |
| Query | 421    | CTCGCTTCTCTTTCTCCTTGGAGGAATTGGATCTGAGTCTGAATTCGGGGATTAAGGCG       | 480    |
| Sbjct | 979280 | <br>CTCGCTTCTCTTTCTCCTTGGAGGAATTGGATCTGAGTCTGAATTCGGGGATTAAGGCG   | 979339 |
| Query | 481    | CTCCCTTTTAATTACGAAAACTTGTAATCTCATTAATCTAAAAAGATTGAATATTaaa        | 540    |
| Sbjct | 979340 | <br>CTTCCTTTTAATTACGAAAACTTGTAATCTCATTAATTTAAAAAGATTGAATATTAAA    | 979399 |
| Query | 541    | aaaaCTTCATTAAAGGGAGAGGATGCAGATAAATTGCAGGCGATTCTTCCAAATACCAAA      | 600    |
|       |        |                                                                   |        |

|       |        |                                                              |        |
|-------|--------|--------------------------------------------------------------|--------|
| Sbjct | 979400 | AAAACATCATTAAAGGGAGAGGATGCAGATAAATTGCAGGCGATTCTTCCAAATACCAAA | 979459 |
| Query | 601    | ATCGACTACTGA 612                                             |        |
|       |        |                                                              |        |
| Sbjct | 979460 | ATCGACTACTGA 979471                                          |        |

>Leptospira borgpetersenii serovar Hardjo strain BK-30 chromosome 1  
Sequence ID: CP015048.1 Length: 3629289  
Range 1: 979247 to 979858

Score:1064 bits(576), Expect:0.0,  
Identities:600/612(98%), Gaps:0/612(0%), Strand: Plus/Plus

|       |        |                                                               |        |
|-------|--------|---------------------------------------------------------------|--------|
| Query | 1      | GGCTTCGTTTGTCTTACTGCGAGTTTCGACTGTAAAAAGAATGCGGAAGAGATTTTGGGA  | 60     |
|       |        |                                                               |        |
| Sbjct | 979247 | GGCTTCGTTTGTCTTACTGCGAGTTTCAATTGTAAAAAGAATGCGGAAGAGATTTTGGGA  | 979306 |
| Query | 61     | GAGGCAAAGGCAAACCGGAATTGGTTCAAACCTTTGGATTTTGAATGCAGAAGTTGTCC   | 120    |
|       |        |                                                               |        |
| Sbjct | 979307 | GAGGCAAAGGCAAACCGGAATTGGTTCAAACCTTTGGATTTTGAATGCAGAAGTTGTCC   | 979366 |
| Query | 121    | ACGGTTCCGGAAGAAGTTTGCAGTTTCCGAATTTAACCAAGTTGGATCTTCGTTTAAAC   | 180    |
|       |        |                                                               |        |
| Sbjct | 979367 | ACGGTTCCGGAAGGAGTTTGCAGTTTCCGAATTTAACCAAGTTGGATCTTCGTTTAAAC   | 979426 |
| Query | 181    | AGTTTGACTTTTCTTCCGGAATTTATCGGAGAATGTAAACGCCTTGAACAACCTTAATCTT | 240    |
|       |        |                                                               |        |
| Sbjct | 979427 | AGTTTGACTTTTCTTCCGGAATTTATCGGAGAATGTAAACGCCTTGAACAACCTTAATCTT | 979486 |
| Query | 241    | TTGCGGAACGACCTTACAACATTTCCGTCTACGTTTCTAAATTAAAAAATCTGAAAGTG   | 300    |
|       |        |                                                               |        |
| Sbjct | 979487 | TTGCGGAACGACCTTACGACATTTCCGTCTACGTTTCTAAATTAAAAAATCTGAAAGTG   | 979546 |
| Query | 301    | TTACTGGCGGGAAATAACGATTTTACGATTCTACCTCCGAACCTTTGTTTCTTCCGTTG   | 360    |
|       |        |                                                               |        |
| Sbjct | 979547 | TTACTGGCGGGAAATAACGATTTTACGATTCTACCTCCGAACCTTTGTTTCTTCCATTG   | 979606 |
| Query | 361    | ATCAAAATTCTATACGTAGATCGGAATAAATTAACCTAACGGAACGGATGTGGAAATT    | 420    |
|       |        |                                                               |        |
| Sbjct | 979607 | ATCAAAATTTTATACGTAGATCGGAATAAATTAATTCTAACGGAACGGATGTGGAAATT   | 979666 |
| Query | 421    | CTCGCTTCTCTTTCTCCTTGGAGGAATTGGATCTGAGTCTGAATTCGGGGATTAAGGCG   | 480    |
|       |        |                                                               |        |
| Sbjct | 979667 | CTCGCTTCTCTTTCTCCTTGGAGGAATTGGATCTGAGTCTGAATTCGGGGATTAAGGCG   | 979726 |
| Query | 481    | CTCCCTTTTAATTACGAAAACTTGTAATCTCATTAATCTAAAAAGATTGAATATTaaa    | 540    |
|       |        |                                                               |        |
| Sbjct | 979727 | CTTCCTTTTAATTACGAAAACTTGTAATCTCATTAATTTAAAAAGATTGAATATTAAA    | 979786 |
| Query | 541    | aaaaCTTCATTAAAGGGAGAGGATGCAGATAAATTGCAGGCGATTCTTCCAAATACCAAA  | 600    |
|       |        |                                                               |        |
| Sbjct | 979787 | AAAACATCATTAAAGGGAGAGGATGCAGATAAATTGCAGGCGATTCTTCCAAATACCAAA  | 979846 |
| Query | 601    | ATCGACTACTGA 612                                              |        |
|       |        |                                                               |        |
| Sbjct | 979847 | ATCGACTACTGA 979858                                           |        |

>Leptospira borgpetersenii serovar Hardjo strain BK-9 chromosome 1  
Sequence ID: CP015046.1 Length: 3631634  
Range 1: 979077 to 979688

Score:1064 bits(576), Expect:0.0,  
Identities:600/612(98%), Gaps:0/612(0%), Strand: Plus/Plus

|       |        |                                                               |        |
|-------|--------|---------------------------------------------------------------|--------|
| Query | 1      | GGCTTCGTTTGTCTTTACTGCGAGTTTCGACTGTAAAAAGAATGCGGAAGAGATTTTGGGA | 60     |
|       |        |                                                               |        |
| Sbjct | 979077 | GGCTTCGTTTGTCTTTACTGCGAGTTTCAATTGTAAAAAGAATGCGGAAGAGATTTTGGGA | 979136 |
| Query | 61     | GAGGCAAAGGCCAAAACCGGAATTGGTTCAAACCTTTGGATTTTGAATGCAGAAGTTGTCC | 120    |
|       |        |                                                               |        |
| Sbjct | 979137 | GAGGCAAAGGCCAAAACCGGAATTGGTTCAAACCTTTGGATTTTGAATGCAGAAGTTGTCC | 979196 |
| Query | 121    | ACGGTTCCGGAAGAAGTTTGCGGTTTTCCGAATTTAACCAAGTTGGATCTTCGTTTAAAC  | 180    |
|       |        |                                                               |        |
| Sbjct | 979197 | ACGGTTCCGGAAGGAGTTTGCGGTTTTCCGAATTTAACCAAGTTGGATCTTCGTTTAAAC  | 979256 |
| Query | 181    | AGTTTGACTTTTCTTCCGGAATTTATCGGAGAATGTAAACGCCTTGAACAACCTTAATCTT | 240    |
|       |        |                                                               |        |
| Sbjct | 979257 | AGTTTGACTTTTCTTCCGGAATTTATCGGAGAATGTAAACGCCTTGAACAACCTTAATCTT | 979316 |
| Query | 241    | TTCGGGAACGACCTTACAACATTTCCGTCTACGTTTTCTAAATTAAAAAATCTGAAAGTG  | 300    |
|       |        |                                                               |        |
| Sbjct | 979317 | TTCGGGAACGACCTTACGACATTTCCGTCTACGTTTTCTAAATTAAAAAATCTGAAAGTG  | 979376 |
| Query | 301    | TTACTGGCGGGAAATAACGATTTTACGATTCTACCCTCCGAACCTTTGTTTCTTCCGTTG  | 360    |
|       |        |                                                               |        |
| Sbjct | 979377 | TTACTGGCGGGAAATAACGATTTTACGATTCTACCCTCCGAACCTTTGTTTCTTCCATTG  | 979436 |
| Query | 361    | ATCAAAATTCTATACGTAGATCGGAATAAATTAACCTAACGGAACGGATGTGGAAATT    | 420    |
|       |        |                                                               |        |
| Sbjct | 979437 | ATCAAAATTTTATACGTAGATCGGAATAAATTAATTCTAACGGAACGGATGTGGAAATT   | 979496 |
| Query | 421    | CTCGCTTCTCTTTCTCCTTGGAGGAATTGGATCTGAGTCTGAATTCGGGGATTAAGGCG   | 480    |
|       |        |                                                               |        |
| Sbjct | 979497 | CTCGCTTCTCTTTCTCCTTGGAGGAATTGGATCTGAGTCTGAATTCGGGGATTAAGGCG   | 979556 |
| Query | 481    | CTCCCTTTTAATTACGAAAACTTGTAATCTCATTAATCTAAAAAGATTGAATATTaaa    | 540    |
|       |        |                                                               |        |
| Sbjct | 979557 | CTTCCTTTTAATTACGAAAACTTGTAATCTCATTAATTTAAAAAGATTGAATATTAAA    | 979616 |
| Query | 541    | aaaaCTTCATTAAAGGGAGAGGATGCAGATAAATTGCAGGCGATTCTTCCAAATACCAAA  | 600    |
|       |        |                                                               |        |
| Sbjct | 979617 | AAAACATCATTAAAGGGAGAGGATGCAGATAAATTGCAGGCGATTCTTCCAAATACCAAA  | 979676 |
| Query | 601    | ATCGACTACTGA 612                                              |        |
|       |        |                                                               |        |
| Sbjct | 979677 | ATCGACTACTGA 979688                                           |        |

>Leptospira borgpetersenii serovar Hardjo strain BK-6 chromosome 1  
Sequence ID: CP015044.1 Length: 3649879  
Range 1: 977825 to 978436

Score:1064 bits(576), Expect:0.0,  
Identities:600/612(98%), Gaps:0/612(0%), Strand: Plus/Plus

|       |   |                                                               |    |
|-------|---|---------------------------------------------------------------|----|
| Query | 1 | GGCTTCGTTTGTCTTTACTGCGAGTTTCGACTGTAAAAAGAATGCGGAAGAGATTTTGGGA | 60 |
|       |   |                                                               |    |

|       |        |                                                                |        |
|-------|--------|----------------------------------------------------------------|--------|
| Sbjct | 977825 | GGCTTCGTTTGTGTTTTACTGCGAGTTTCAATTGTAAAAAGAATGCGGAAGAGATTTTGGGA | 977884 |
| Query | 61     | GAGGCAAAGGCAAACCGGAATTGGTTCAAACCTTTGGATTTTGAATGCAGAAGTTGTCC    | 120    |
|       |        |                                                                |        |
| Sbjct | 977885 | GAGGCAAAGGCAAACCGGAATTGGTTCAAACCTTTGGATTTTGAATGCAGAAGTTGTCC    | 977944 |
| Query | 121    | ACGGTTCCGGAAGAAGTTTGCGGTTTTCCGAATTTAACCAAGTTGGATCTTCGTTTAAAC   | 180    |
|       |        |                                                                |        |
| Sbjct | 977945 | ACGGTTCCGGAAGAAGTTTGCGGTTTTCCGAATTTAACCAAGTTGGATCTTCGTTTAAAC   | 978004 |
| Query | 181    | AGTTTGACTTTTCTTCCGGAATTTATCGGAGAATGTAAACGCCTTGAACAACCTTAATCTT  | 240    |
|       |        |                                                                |        |
| Sbjct | 978005 | AGTTTGACTTTTCTTCCGGAATTTATCGGAGAATGTAAACGCCTTGAACAACCTTAATCTT  | 978064 |
| Query | 241    | TTCGGGAACGACCTTACAACATTTCCGTCTACGTTTTCTAAATTAAAAAATCTGAAAGTG   | 300    |
|       |        |                                                                |        |
| Sbjct | 978065 | TTCGGGAACGACCTTACGACATTTCCGTCTACGTTTTCTAAATTAAAAAATCTGAAAGTG   | 978124 |
| Query | 301    | TTACTGGCGGGAAATAACGATTTTACGATTCTACCTCCGAACCTTTGTTTCTTCCGTTG    | 360    |
|       |        |                                                                |        |
| Sbjct | 978125 | TTACTGGCGGGAAATAACGATTTTACGATTCTACCTCCGAACCTTTGTTTCTTCCATTG    | 978184 |
| Query | 361    | ATCAAAATTCTATACGTAGATCGGAATAAATTAACCTAACGGAAACGGATGTGGAAATT    | 420    |
|       |        |                                                                |        |
| Sbjct | 978185 | ATCAAAATTTTATACGTAGATCGGAATAAATTAATTCTAACGGAAACGGATGTGGAAATT   | 978244 |
| Query | 421    | CTCGCTTCTCTTTCTCCTTGGAGGAATTGGATCTGAGTCTGAATTCGGGGATTAAGGCG    | 480    |
|       |        |                                                                |        |
| Sbjct | 978245 | CTCGCTTCTCTTTCTCCTTGGAGGAATTGGATCTGAGTCTGAATTCGGGGATTAAGGCG    | 978304 |
| Query | 481    | CTCCCTTTTAATTACGAAAACTTGTAATCTCATTAATCTAAAAAGATTGAATATTaaa     | 540    |
|       |        |                                                                |        |
| Sbjct | 978305 | CTTCCTTTTAATTACGAAAACTTGTAATCTCATTAATTTAAAAAGATTGAATATTAAA     | 978364 |
| Query | 541    | aaaaCTTCATTAAAGGGAGAGGATGCAGATAAATTGCAGGCGATTCTTCCAAATACCAAA   | 600    |
|       |        |                                                                |        |
| Sbjct | 978365 | AAAACATCATTAAAGGGAGAGGATGCAGATAAATTGCAGGCGATTCTTCCAAATACCAAA   | 978424 |
| Query | 601    | ATCGACTACTGA 612                                               |        |
|       |        |                                                                |        |
| Sbjct | 978425 | ATCGACTACTGA 978436                                            |        |

>Leptospira borgpetersenii strain KR39 chromosome 1, complete sequence

Sequence ID: CP096127.1 Length: 3603773

Range 1: 936053 to 936664

Score:1064 bits(576), Expect:0.0,

Identities:600/612(98%), Gaps:0/612(0%), Strand: Plus/Plus

|       |        |                                                                 |        |
|-------|--------|-----------------------------------------------------------------|--------|
| Query | 1      | GGCTTCGTTTGTGTTTTACTGCGAGTTTTCGACTGTAAAAAGAATGCGGAAGAGATTTTGGGA | 60     |
|       |        |                                                                 |        |
| Sbjct | 936053 | GGCTTCGTTTGTGTTTTACTGCGAGTTTCAATTGTAAAAAGAATGCGGAAGAGATTTTGGGA  | 936112 |
| Query | 61     | GAGGCAAAGGCAAACCGGAATTGGTTCAAACCTTTGGATTTTGAATGCAGAAGTTGTCC     | 120    |
|       |        |                                                                 |        |
| Sbjct | 936113 | GAGGCAAAGGCAAACCGGAATTGGTTCAAACCTTTGGATTTTGAATGCAGAAGTTGTCC     | 936172 |
| Query | 121    | ACGGTTCCGGAAGAAGTTTGCGGTTTTCCGAATTTAACCAAGTTGGATCTTCGTTTAAAC    | 180    |
|       |        |                                                                 |        |
| Sbjct | 936173 | ACGGTTCCGGAAGAAGTTTGCGGTTTTCCGAATTTAACCAAGTTGGATCTTCGTTTAAAC    | 936232 |

|       |        |                                                               |        |
|-------|--------|---------------------------------------------------------------|--------|
| Query | 181    | AGTTTGACTTTTCTTCCGGAATTTATCGGAGAATGTAAACGCCTTGAACAACCTTAATCTT | 240    |
|       |        |                                                               |        |
| Sbjct | 936233 | AGTTTGACTTTTCTTCCGGAATTTATCGGAGAATGTAAACGCCTTGAACAACCTTAATCTT | 936292 |
| Query | 241    | TTCGGGAACGACCTTACAACATTTCCGTCTACGTTTTCTAAATTAAAAAATCTGAAAGTG  | 300    |
|       |        |                                                               |        |
| Sbjct | 936293 | TTCGGGAACGACCTTACGACATTTCCGTCTACGTTTTCTAAATTAAAAAATCTGAAAGTG  | 936352 |
| Query | 301    | TTACTGGCGGGAAATAACGATTTTACGATTCTACCCTCCGAACTTTGTTCCTTCCGTTG   | 360    |
|       |        |                                                               |        |
| Sbjct | 936353 | TTACTGGCGGGAAATAACGATTTTACGATTCTACCCTCCGAACTTTGTTCCTTCCATTG   | 936412 |
| Query | 361    | ATCAAAATTCTATACGTAGATCGGAATAAATTAACCTAACGGAAACGGATGTGGAAATT   | 420    |
|       |        |                                                               |        |
| Sbjct | 936413 | ATCAAAATTTTATACGTAGATCGGAATAAATTAATTCTAACGGAAACGGATGTGGAAATT  | 936472 |
| Query | 421    | CTCGCTTCTCTTTCTCCTTGGAGGAATTGGATCTGAGTCTGAATTCGGGGATTAAGGCG   | 480    |
|       |        |                                                               |        |
| Sbjct | 936473 | CTCGCTTCTCTTTCTCCTTGGAGGAATTGGATCTGAGTCTGAATTCGGGGATTAAGGCG   | 936532 |
| Query | 481    | CTCCCTTTTAATTACGAAAACTTGTAATCTCATTAATCTAAAAAGATTGAATATTaaa    | 540    |
|       |        |                                                               |        |
| Sbjct | 936533 | CTTCCTTTTAATTACGAAAACTTGTAATCTCATTAATTTAAAAAGATTGAATATTAAA    | 936592 |
| Query | 541    | aaaaCTTCATTAAAGGGAGAGGATGCAGATAAATTGCAGGCGATTCTTCCAAATACCAAA  | 600    |
|       |        |                                                               |        |
| Sbjct | 936593 | AAAACATCATTAAAGGGAGAGGATGCAGATAAATTGCAGGCGATTCTTCCAAATACCAAA  | 936652 |
| Query | 601    | ATCGACTACTGA 612                                              |        |
|       |        |                                                               |        |
| Sbjct | 936653 | ATCGACTACTGA 936664                                           |        |

>Leptospira borgpetersenii serovar Hardjo strain TC129 chromosome I, complete sequence  
Sequence ID: CP084038.1 Length: 3585597  
Range 1: 935940 to 936551

Score:1064 bits(576), Expect:0.0,  
Identities:600/612(98%), Gaps:0/612(0%), Strand: Plus/Plus

|       |        |                                                               |        |
|-------|--------|---------------------------------------------------------------|--------|
| Query | 1      | GGCTTCGTTTGTCTTACTGCGAGTTTCGACTGTAAAAAGAATGCGGAAGAGATTTTGGGA  | 60     |
|       |        |                                                               |        |
| Sbjct | 935940 | GGCTTCGTTTGTCTTACTGCGAGTTTCAATTGTAAAAAGAATGCGGAAGAGATTTTGGGA  | 935999 |
| Query | 61     | GAGGCAAAGGCAAAACCGGAATTGGTTCAAACCTTTGGATTTTGAATGCAGAAGTTGTCC  | 120    |
|       |        |                                                               |        |
| Sbjct | 936000 | GAGGCAAAGGCAAAACCGGAATTGGTTCAAACCTTTGGATTTTGAATGCAGAAGTTGTCC  | 936059 |
| Query | 121    | ACGGTTCCGGAAGAAGTTTGCGGTTTTCCGAATTTAACCAAGTTGGATCTTCGTTTAAAC  | 180    |
|       |        |                                                               |        |
| Sbjct | 936060 | ACGGTTCCGGAAGGAGTTTGCGGTTTTCCGAATTTAACCAAGTTGGATCTTCGTTTAAAC  | 936119 |
| Query | 181    | AGTTTGACTTTTCTTCCGGAATTTATCGGAGAATGTAAACGCCTTGAACAACCTTAATCTT | 240    |
|       |        |                                                               |        |
| Sbjct | 936120 | AGTTTGACTTTTCTTCCGGAATTTATCGGAGAATGTAAACGCCTTGAACAACCTTAATCTT | 936179 |
| Query | 241    | TTCGGGAACGACCTTACAACATTTCCGTCTACGTTTTCTAAATTAAAAAATCTGAAAGTG  | 300    |
|       |        |                                                               |        |
| Sbjct | 936180 | TTCGGGAACGACCTTACGACATTTCCGTCTACGTTTTCTAAATTAAAAAATCTGAAAGTG  | 936239 |

|       |        |                                                              |        |
|-------|--------|--------------------------------------------------------------|--------|
| Query | 301    | TTACTGGCGGGAAATAACGATTTTACGATTCTACCCTCCGAACTTTGTTCCTTCCGTTG  | 360    |
|       |        |                                                              |        |
| Sbjct | 936240 | TTACTGGCGGGAAATAACGATTTTACGATTCTACCCTCCGAACTTTGTTCCTTCCATTG  | 936299 |
| Query | 361    | ATCAAAATTCTATACGTAGATCGGAATAAATTAACCTAACGGAAACGGATGTGGAAATT  | 420    |
|       |        |                                                              |        |
| Sbjct | 936300 | ATCAAAATTTTATACGTAGATCGGAATAAATTAATTCTAACGGAAACGGATGTGGAAATT | 936359 |
| Query | 421    | CTCGCTTCTCTTTCTCCTTGGAGGAATTGGATCTGAGTCTGAATTCGGGGATTAAGGCG  | 480    |
|       |        |                                                              |        |
| Sbjct | 936360 | CTCGCTTCTCTTTCTCCTTGGAGGAATTGGATCTGAGTCTGAATTCGGGGATTAAGGCG  | 936419 |
| Query | 481    | CTCCCTTTTAAATTACGAAAACTTGTAATCTCATTAATCTAAAAAGATTGAATATTaaa  | 540    |
|       |        |                                                              |        |
| Sbjct | 936420 | CTTCCTTTTAAATTACGAAAACTTGTAATCTCATTAATTTAAAAAGATTGAATATTAAA  | 936479 |
| Query | 541    | aaaaCTTCATTAAAGGGAGAGGATGCAGATAAATTGCAGGCGATTCTTCCAAATACCAAA | 600    |
|       |        |                                                              |        |
| Sbjct | 936480 | AAAACATCATTAAAGGGAGAGGATGCAGATAAATTGCAGGCGATTCTTCCAAATACCAAA | 936539 |
| Query | 601    | ATCGACTACTGA 612                                             |        |
|       |        |                                                              |        |
| Sbjct | 936540 | ATCGACTACTGA 936551                                          |        |

>Leptospira borgpetersenii strain TC147 chromosome I, complete sequence  
Sequence ID: CP084040.1 Length: 3585599  
Range 1: 935940 to 936551

Score:1064 bits(576), Expect:0.0,  
Identities:600/612(98%), Gaps:0/612(0%), Strand: Plus/Plus

|       |        |                                                                |        |
|-------|--------|----------------------------------------------------------------|--------|
| Query | 1      | GGCTTCGTTTGTTCCTTACTGCGAGTTTCGACTGTAAAAAGAATGCGGAAGAGATTTTGGGA | 60     |
|       |        |                                                                |        |
| Sbjct | 935940 | GGCTTCGTTTGTTCCTTACTGCGAGTTTCAATTGTAAAAAGAATGCGGAAGAGATTTTGGGA | 935999 |
| Query | 61     | GAGGCAAAGGCAAACCGGAATTGGTTCAAACCTTTGGATTTTGAATGCAGAAGTTGTCC    | 120    |
|       |        |                                                                |        |
| Sbjct | 936000 | GAGGCAAAGGCAAACCGGAATTGGTTCAAACCTTTGGATTTTGAATGCAGAAGTTGTCC    | 936059 |
| Query | 121    | ACGTTTCCGGAAGAAGTTTGCAGTTTTCGAATTTAACCAAGTTGGATCTTCGTTTAAAC    | 180    |
|       |        |                                                                |        |
| Sbjct | 936060 | ACGTTTCCGGAAGGAGTTTGCAGTTTTCGAATTTAACCAAGTTGGATCTTCGTTTAAAC    | 936119 |
| Query | 181    | AGTTTGACTTTTCTTCCGGAATTTATCGGAGAATGTAAACGCCTTGAACAACCTTAATCTT  | 240    |
|       |        |                                                                |        |
| Sbjct | 936120 | AGTTTGACTTTTCTTCCGGAATTTATCGGAGAATGTAAACGCCTTGAACAACCTTAATCTT  | 936179 |
| Query | 241    | TTTCGGGAACGACCTTACAACATTTCCGTCTACGTTTTCTAAATTAAAAAATCTGAAAGTG  | 300    |
|       |        |                                                                |        |
| Sbjct | 936180 | TTTCGGGAACGACCTTACGACATTTCCGTCTACGTTTTCTAAATTAAAAAATCTGAAAGTG  | 936239 |
| Query | 301    | TTACTGGCGGGAAATAACGATTTTACGATTCTACCCTCCGAACTTTGTTCCTTCCGTTG    | 360    |
|       |        |                                                                |        |
| Sbjct | 936240 | TTACTGGCGGGAAATAACGATTTTACGATTCTACCCTCCGAACTTTGTTCCTTCCATTG    | 936299 |
| Query | 361    | ATCAAAATTCTATACGTAGATCGGAATAAATTAACCTAACGGAAACGGATGTGGAAATT    | 420    |
|       |        |                                                                |        |
| Sbjct | 936300 | ATCAAAATTTTATACGTAGATCGGAATAAATTAATTCTAACGGAAACGGATGTGGAAATT   | 936359 |
| Query | 421    | CTCGCTTCTCTTTCTCCTTGGAGGAATTGGATCTGAGTCTGAATTCGGGGATTAAGGCG    | 480    |

|       |        |  |                                                              |        |
|-------|--------|--|--------------------------------------------------------------|--------|
| Sbjct | 936360 |  | CTCGCTTCTCTTTCTCCTTGGAGGAATTGGATCTGAGTCTGAATTCGGGGATTAAGGCG  | 936419 |
| Query | 481    |  | CTCCCTTTTAATTACGAAAACTTGTAATCTCATTAATCTAAAAAGATTGAATATTaaa   | 540    |
| Sbjct | 936420 |  | CTTCCTTTTAATTACGAAAACTTGTAATCTCATTAATTTAAAAAGATTGAATATTAAA   | 936479 |
| Query | 541    |  | aaaaCTTCATTAAAGGGAGAGGATGCAGATAAATTGCAGGCGATTCTTCCAAATACCAAA | 600    |
| Sbjct | 936480 |  | AAAACATCATTAAAGGGAGAGGATGCAGATAAATTGCAGGCGATTCTTCCAAATACCAAA | 936539 |
| Query | 601    |  | ATCGACTACTGA 612                                             |        |
| Sbjct | 936540 |  | ATCGACTACTGA 936551                                          |        |

>Leptospira borgpetersenii strain TC273 chromosome I, complete sequence  
Sequence ID: CP084042.1 Length: 3585577  
Range 1: 935929 to 936540

Score:1064 bits(576), Expect:0.0,  
Identities:600/612(98%), Gaps:0/612(0%), Strand: Plus/Plus

|       |        |  |                                                               |        |
|-------|--------|--|---------------------------------------------------------------|--------|
| Query | 1      |  | GGCTTCGTTTGTCTTACTGCGAGTTTCGACTGTAAAAAGAATGCGGAAGAGATTTTGGGA  | 60     |
| Sbjct | 935929 |  | GGCTTCGTTTGTCTTACTGCGAGTTTCAATTGTAAAAAGAATGCGGAAGAGATTTTGGGA  | 935988 |
| Query | 61     |  | GAGGCAAAGGCAAAACCGGAATTGGTTCAAACCTTTGGATTTTGAATGCAGAAGTTGTCC  | 120    |
| Sbjct | 935989 |  | GAGGCAAAGGCAAAACCGGAATTGGTTCAAACCTTTGGATTTTGAATGCAGAAGTTGTCC  | 936048 |
| Query | 121    |  | ACGGTTCCGGAAGAAGTTTGCAGTTTTCGAATTTAACCAAGTTGGATCTTCGTTTAAAC   | 180    |
| Sbjct | 936049 |  | ACGGTTCCGGAAGGAGTTTGCAGTTTTCGAATTTAACCAAGTTGGATCTTCGTTTAAAC   | 936108 |
| Query | 181    |  | AGTTTGACTTTTCTTCCGGAATTTATCGGAGAATGTAAACGCCTTGAACAACCTTAATCTT | 240    |
| Sbjct | 936109 |  | AGTTTGACTTTTCTTCCGGAATTTATCGGAGAATGTAAACGCCTTGAACAACCTTAATCTT | 936168 |
| Query | 241    |  | TTCGGGAACGACCTTACAACATTTCCGTCTACGTTTCTAAATTAAAAAATCTGAAAGTG   | 300    |
| Sbjct | 936169 |  | TTCGGGAACGACCTTACGACATTTCCGTCTACGTTTCTAAATTAAAAAATCTGAAAGTG   | 936228 |
| Query | 301    |  | TTACTGGCGGGAAATAACGATTTTACGATTCTACCCTCCGAACCTTTGTTTCTTCCGTTG  | 360    |
| Sbjct | 936229 |  | TTACTGGCGGGAAATAACGATTTTACGATTCTACCTTCCGAACCTTTGTTTCTTCCATTG  | 936288 |
| Query | 361    |  | ATCAAAATTCTATACGTAGATCGGAATAAATTAACCTCTAACGGAAACGGATGTGGAAATT | 420    |
| Sbjct | 936289 |  | ATCAAAATTTTATACGTAGATCGGAATAAATTAATTCTAACGGAAACGGATGTGGAAATT  | 936348 |
| Query | 421    |  | CTCGCTTCTCTTTCTCCTTGGAGGAATTGGATCTGAGTCTGAATTCGGGGATTAAGGCG   | 480    |
| Sbjct | 936349 |  | CTCGCTTCTCTTTCTCCTTGGAGGAATTGGATCTGAGTCTGAATTCGGGGATTAAGGCG   | 936408 |
| Query | 481    |  | CTCCCTTTTAATTACGAAAACTTGTAATCTCATTAATCTAAAAAGATTGAATATTaaa    | 540    |
| Sbjct | 936409 |  | CTTCCTTTTAATTACGAAAACTTGTAATCTCATTAATTTAAAAAGATTGAATATTAAA    | 936468 |
| Query | 541    |  | aaaaCTTCATTAAAGGGAGAGGATGCAGATAAATTGCAGGCGATTCTTCCAAATACCAAA  | 600    |
|       |        |  |                                                               |        |



|       |        |                                                              |        |
|-------|--------|--------------------------------------------------------------|--------|
| Sbjct | 936469 | AAAACATCATTAAAGGGAGAGGATGCAGATAAATTGCAGGCGATTCTTCCAAATACCAAA | 936528 |
| Query | 601    | ATCGACTACTGA 612                                             |        |
|       |        |                                                              |        |
| Sbjct | 936529 | ATCGACTACTGA 936540                                          |        |

>Leptospira borgpetersenii strain TC112 chromosome I, complete sequence  
Sequence ID: CP084036.1 Length: 3585599  
Range 1: 935940 to 936551

Score:1064 bits(576), Expect:0.0,  
Identities:600/612(98%), Gaps:0/612(0%), Strand: Plus/Plus

|       |        |                                                               |        |
|-------|--------|---------------------------------------------------------------|--------|
| Query | 1      | GGCTTCGTTTGTCTTACTGCGAGTTTCGACTGTAAAAAGAATGCGGAAGAGATTTTGGGA  | 60     |
|       |        |                                                               |        |
| Sbjct | 935940 | GGCTTCGTTTGTCTTACTGCGAGTTTCAATTGTAAAAAGAATGCGGAAGAGATTTTGGGA  | 935999 |
| Query | 61     | GAGGCAAAGGCAAACCGGAATTGGTTCAAACCTTTGGATTTTGAATGCAGAAGTTGTCC   | 120    |
|       |        |                                                               |        |
| Sbjct | 936000 | GAGGCAAAGGCAAACCGGAATTGGTTCAAACCTTTGGATTTTGAATGCAGAAGTTGTCC   | 936059 |
| Query | 121    | ACGGTTCCGGAAGAAGTTTGCAGTTTCCGAATTTAACCAAGTTGGATCTTCGTTTAAAC   | 180    |
|       |        |                                                               |        |
| Sbjct | 936060 | ACGGTTCCGGAAGGAGTTTGCAGTTTCCGAATTTAACCAAGTTGGATCTTCGTTTAAAC   | 936119 |
| Query | 181    | AGTTTGACTTTTCTTCCGGAATTTATCGGAGAATGTAAACGCCTTGAACAACCTTAATCTT | 240    |
|       |        |                                                               |        |
| Sbjct | 936120 | AGTTTGACTTTTCTTCCGGAATTTATCGGAGAATGTAAACGCCTTGAACAACCTTAATCTT | 936179 |
| Query | 241    | TTGCGGAACGACCTTACAACATTTCCGTCTACGTTTCTAAATTAAAAAATCTGAAAGTG   | 300    |
|       |        |                                                               |        |
| Sbjct | 936180 | TTGCGGAACGACCTTACGACATTTCCGTCTACGTTTCTAAATTAAAAAATCTGAAAGTG   | 936239 |
| Query | 301    | TTACTGGCGGGAAATAACGATTTTACGATTCTACCTCCGAACCTTTGTTTCTTCCGTTG   | 360    |
|       |        |                                                               |        |
| Sbjct | 936240 | TTACTGGCGGGAAATAACGATTTTACGATTCTACCTCCGAACCTTTGTTTCTTCCATTG   | 936299 |
| Query | 361    | ATCAAAATTCTATACGTAGATCGGAATAAATTAACCTAACGGAACGGATGTGGAAATT    | 420    |
|       |        |                                                               |        |
| Sbjct | 936300 | ATCAAAATTTTATACGTAGATCGGAATAAATTAATCTAACGGAACGGATGTGGAAATT    | 936359 |
| Query | 421    | CTCGCTTCTCTTCTCCTTGGAGGAATTGGATCTGAGTCTGAATTCGGGGATTAAGGCG    | 480    |
|       |        |                                                               |        |
| Sbjct | 936360 | CTCGCTTCTCTTCTCCTTGGAGGAATTGGATCTGAGTCTGAATTCGGGGATTAAGGCG    | 936419 |
| Query | 481    | CTCCCTTTTAATTACGAAAACTTGTAATCTCATTAATCTAAAAAGATTGAATATTaaa    | 540    |
|       |        |                                                               |        |
| Sbjct | 936420 | CTTCCTTTTAATTACGAAAACTTGTAATCTCATTAATTTAAAAAGATTGAATATTAAA    | 936479 |
| Query | 541    | aaaaCTTCATTAAAGGGAGAGGATGCAGATAAATTGCAGGCGATTCTTCCAAATACCAAA  | 600    |
|       |        |                                                               |        |
| Sbjct | 936480 | AAAACATCATTAAAGGGAGAGGATGCAGATAAATTGCAGGCGATTCTTCCAAATACCAAA  | 936539 |
| Query | 601    | ATCGACTACTGA 612                                              |        |
|       |        |                                                               |        |
| Sbjct | 936540 | ATCGACTACTGA 936551                                           |        |

>Leptospira borgpetersenii serovar Hardjo-bovis L550 chromosome 1, complete sequence  
Sequence ID: CP000348.1 Length: 3614446  
Range 1: 969260 to 969871

Score:1064 bits(576), Expect:0.0,  
Identities:600/612(98%), Gaps:0/612(0%), Strand: Plus/Plus

|       |        |                                                               |        |
|-------|--------|---------------------------------------------------------------|--------|
| Query | 1      | GGCTTCGTTTGTCTTACTGCGAGTTTCGACTGTAAAAAGAATGCGGAAGAGATTTTGGGA  | 60     |
|       |        |                                                               |        |
| Sbjct | 969260 | GGCTTCGTTTGTCTTACTGCGAGTTTCAATTGTAAAAAGAATGCGGAAGAGATTTTGGGA  | 969319 |
| Query | 61     | GAGGCAAAGGCCAAACCGGAATTGGTTCAAACCTTTGGATTTTGAATGCAGAAGTTGTCC  | 120    |
|       |        |                                                               |        |
| Sbjct | 969320 | GAGGCAAAGGCCAAACCGGAATTGGTTCAAACCTTTGGATTTTGAATGCAGAAGTTGTCC  | 969379 |
| Query | 121    | ACGGTTCCGGAAGAAGTTTGC GGTTTTCCGAATTTAACCAAGTTGGATCTTCGTTTAAAC | 180    |
|       |        |                                                               |        |
| Sbjct | 969380 | ACGGTTCCGGAAGGAGTTTGC GGTTTTCCGAATTTAACCAAGTTGGATCTTCGTTTAAAC | 969439 |
| Query | 181    | AGTTTGACTTTTCTTCCGGAATTTATCGGAGAATGTAAACGCCTTGAACAACCTTAATCTT | 240    |
|       |        |                                                               |        |
| Sbjct | 969440 | AGTTTGACTTTTCTTCCGGAATTTATCGGAGAATGTAAACGCCTTGAACAACCTTAATCTT | 969499 |
| Query | 241    | TTCGGGAACGACCTTACAACATTTCCGTCTACGTTTTCTAAATTAAAAAATCTGAAAGTG  | 300    |
|       |        |                                                               |        |
| Sbjct | 969500 | TTCGGGAACGACCTTACAACATTTCCGTCTACGTTTTCTAAATTAAAAAATCTGAAAGTG  | 969559 |
| Query | 301    | TTACTGGCGGGAAATAACGATTTTACGATTCTACCCTCCGAACCTTTGTTTCTTCCGTTG  | 360    |
|       |        |                                                               |        |
| Sbjct | 969560 | TTACTGGCGGGAAATAACGATTTTACGATTCTACCCTCCGAACCTTTGTTTCTTCCATTG  | 969619 |
| Query | 361    | ATCAAAATTCTATACGTAGATCGGAATAAATTAACCTAACGGAAACGGATGTGGAAATT   | 420    |
|       |        |                                                               |        |
| Sbjct | 969620 | ATCAAAATTTTATACGTAGATCGGAATAAATTAATTCTAACGGAAACGGATGTGGAAATT  | 969679 |
| Query | 421    | CTCGCTTCTCTTTCTCCTTGGAGGAATTGGATCTGAGTCTGAATTCGGGGATTAAGGCG   | 480    |
|       |        |                                                               |        |
| Sbjct | 969680 | CTCGCTTCTCTTTCTCCTTGGAGGAATTGGATCTGAGTCTGAATTCGGGGATTAAGGCG   | 969739 |
| Query | 481    | CTCCCTTTTAATTACGAAAACTTGTAATCTCATTAATCTAAAAAGATTGAATATTaaa    | 540    |
|       |        |                                                               |        |
| Sbjct | 969740 | CTTCCTTTTAATTACGAAAACTTGTAATCTCATTAATTTAAAAAGATTGAATATTAAA    | 969799 |
| Query | 541    | aaaaCTTCATTAAAGGGAGAGGATGCAGATAAATTGCAGGCGATTCTTCCAAATACCAAA  | 600    |
|       |        |                                                               |        |
| Sbjct | 969800 | AAAACATCATTAAAGGGAGAGGATGCAGATAAATTGCAGGCGATTCTTCCAAATACCAAA  | 969859 |
| Query | 601    | ATCGACTACTGA                                                  | 612    |
|       |        |                                                               |        |
| Sbjct | 969860 | ATCGACTACTGA                                                  | 969871 |
