# Supplementary material for: Leptospira borgpetersenii Leucine-Rich Repeat Proteins Provide Strong Protective Efficacy as Novel Leptospiral Vaccine Candidates
Source: Trop Med Infect Dis. 2022 Dec 22;8(1):6. doi: 10.3390/tropicalmed8010006 (PMC9863753; doi:10.3390/tropicalmed8010006)
Supplement: Supplementary file 1 [file tropicalmed-08-00006-s001.zip]

Archive with 4 entries (4 files):
- Supplementary data S1.pdf
- Supplementary data S2.pdf
- Supplementary data S3.pdf
- Supplementary Figure S1.pdf
